# Supplementary material
Source: PubMed Central journal article supplement (PMC4047187)
Supplement: NIHMS563835-supplement-Supporting_information.pdf [file NIHMS563835-supplement-Supporting_information.pdf]

## Supporting Information: Irreversible Inhibition of DNA Polymerase $\beta$ by Small Molecule Mimics of a DNA Lesion.

Dumitru Arian<sup>a</sup>, Mohammad Hedayati<sup>b</sup>, Haoming Zhou<sup>b</sup>, Zoe Bilis<sup>b</sup>, Karen Chen<sup>b</sup>, Theodore L. DeWeese<sup>b,c</sup>, and Marc M. Greenberg<sup>\*a</sup>

<sup>a</sup>Department of Chemistry, Johns Hopkins University, 3400 N. Charles St., Baltimore, MD 21218

<sup>b</sup>Department of Radiation Oncology and Molecular Radiation Sciences, Johns Hopkins University School of Medicine, Baltimore, MD 21231

<sup>c</sup>Sidney Kimmel Comprehensive Cancer Center, Johns Hopkins University School of Medicine, Baltimore, MD 21231

### Contents:

1. Experimental procedures. (S3-26)
2. **Supporting Information Table 1.** Rate dependence of product formation on presence of inhibitor as a function of cell type. (S26)
3. **Supporting Information Figure 1.** Concentration dependence of Pol  $\beta$  strand displacement synthesis inhibition by **2a**. (S26)
4. **Supporting Information Figure 2.** Concentration dependence of Pol  $\beta$  strand displacement synthesis inhibition by **16**. (S27)
5. **Supporting Information Figure 3.** Relative Pol  $\beta$  activity with and without **3a** following dialysis. (S27)
6. **Supporting Information Figure 4.** Pol  $\beta$  polymerase activity in the absence of inhibitor and the presence of **3a** or its reduced form, **17**. (S28)
7. **Supporting Information Figure 5.** Selectivity for Pol  $\beta$  inhibition by **3a**. (S28)
8. **Supporting Information Figure 6.** IC<sub>50</sub> of Pol  $\beta$  inactivation by **1a** (30 min preincubation). (S28)
9. **Supporting Information Figure 7.** Chart of aldehydes used to prepare oxime library (S29-30)
10. **Supporting Information Figure 8.** <sup>1</sup>H and <sup>13</sup>C NMR spectra of **11** in CDCl<sub>3</sub>. (S31)
11. **Supporting Information Figure 9.** <sup>1</sup>H and <sup>13</sup>C NMR spectra of **4\_fraction1** in CDCl<sub>3</sub>. (S32)
12. **Supporting Information Figure 10.** <sup>1</sup>H and <sup>13</sup>C NMR spectra of **4\_fraction2** in CDCl<sub>3</sub>. (S33)
13. **Supporting Information Figure 11.** <sup>1</sup>H and <sup>13</sup>C NMR spectra of **5** in acetone-d<sub>6</sub>. (S34)
14. **Supporting Information Figure 12.** <sup>31</sup>P NMR spectrum of **5** in acetone-d<sub>6</sub>. (S35)
15. **Supporting Information Figure 13.** <sup>1</sup>H and <sup>13</sup>C NMR spectra of **6** in CDCl<sub>3</sub>. (S36)
16. **Supporting Information Figure 14.** <sup>31</sup>P NMR spectrum of **6** in CDCl<sub>3</sub>. (S37)
17. **Supporting Information Figure 15.** <sup>1</sup>H and <sup>13</sup>C NMR spectra of **7** in CDCl<sub>3</sub>. (S38)
18. **Supporting Information Figure 16.** <sup>31</sup>P NMR spectrum of **7** in CDCl<sub>3</sub>. (S39)
19. **Supporting Information Figure 17.** <sup>1</sup>H and <sup>13</sup>C NMR spectra of **8** in CDCl<sub>3</sub>. (S40)
20. **Supporting Information Figure 18.** <sup>31</sup>P NMR spectrum of **8** in CDCl<sub>3</sub>. (S41)
21. **Supporting Information Figure 19.** <sup>1</sup>H and <sup>31</sup>P NMR spectra of **1a** in acetonitrile-d<sub>3</sub>. (S42)
22. **Supporting Information Figure 20.** <sup>1</sup>H and <sup>13</sup>C NMR spectra of **S2** in acetonitrile-d<sub>3</sub> (S43)
23. **Supporting Information Figure 21.** <sup>31</sup>P NMR spectrum of **S2** in acetonitrile-d<sub>3</sub>. (S44)
24. **Supporting Information Figure 22.** <sup>1</sup>H and <sup>13</sup>C NMR spectra of **S3** in CDCl<sub>3</sub>. (S45)
25. **Supporting Information Figure 23.** <sup>31</sup>P NMR spectrum of **S3** in CDCl<sub>3</sub>. (S46)
26. **Supporting Information Figure 24.** <sup>1</sup>H and <sup>13</sup>C NMR spectra of **S4** in CDCl<sub>3</sub>. (S47)

27. **Supporting Information Figure 25.**  $^{31}\text{P}$  NMR spectrum of **S4** in  $\text{CDCl}_3$ . (S48)
28. **Supporting Information Figure 26.**  $^1\text{H}$  and  $^{13}\text{C}$  NMR spectra of **S5** in  $\text{CDCl}_3$ . (S49)
29. **Supporting Information Figure 27.**  $^{31}\text{P}$  NMR spectrum of **S5** in  $\text{CDCl}_3$ . (S50)
30. **Supporting Information Figure 28.**  $^1\text{H}$  and  $^{31}\text{P}$  NMR spectra of **2a** in acetonitrile- $\text{d}_3$ . (S51)
31. **Supporting Information Figure 29.**  $^1\text{H}$  and  $^{13}\text{C}$  NMR spectra of **S6** in methanol- $\text{d}_4$ . (S52)
32. **Supporting Information Figure 30.**  $^{31}\text{P}$  NMR spectrum of **S6** in methanol- $\text{d}_4$ . (S53)
33. **Supporting Information Figure 31.**  $^1\text{H}$  and  $^{31}\text{P}$  NMR spectra of **3a** in  $\text{D}_2\text{O}$ . (S54)
34. **Supporting Information Figure 32.** MALDI-TOF MS spectra of **17**. (S55)
35. **Supporting Information Figure 33.**  $^1\text{H}$  and  $^{13}\text{C}$  NMR spectra of **S7** in  $\text{CDCl}_3$ . (S56)
36. **Supporting Information Figure 34.**  $^1\text{H}$  and  $^{13}\text{C}$  NMR spectra of **20a** in  $\text{CDCl}_3$ . (S57)
37. **Supporting Information Figure 35.**  $^1\text{H}$  and  $^{13}\text{C}$  NMR spectra of **20b** in  $\text{CDCl}_3$ . (S58)
38. **Supporting Information Figure 36.**  $^1\text{H}$  and  $^{13}\text{C}$  NMR spectra of **S8** in  $\text{CDCl}_3$ . (S59)
39. **Supporting Information Figure 37.**  $^{31}\text{P}$  NMR spectrum of **S8** in  $\text{CDCl}_3$ . (S60)
40. **Supporting Information Figure 38.**  $^1\text{H}$  and  $^{13}\text{C}$  NMR spectra of **21** in  $\text{CDCl}_3$ . (S61)
41. **Supporting Information Figure 39.**  $^{31}\text{P}$  NMR spectrum of **21** in  $\text{CDCl}_3$ . (S62)
42. **Supporting Information Figure 40.**  $^1\text{H}$  and  $^{13}\text{C}$  NMR spectra of **S9** in  $\text{CDCl}_3$ . (S63)
43. **Supporting Information Figure 41.**  $^{31}\text{P}$  NMR spectrum of **S9** in  $\text{CDCl}_3$ . (S64)
44. **Supporting Information Figure 42.**  $^1\text{H}$  and  $^{13}\text{C}$  NMR spectra of **18** in  $\text{D}_2\text{O}$ . (S65)
45. **Supporting Information Figure 43.**  $^{31}\text{P}$  NMR spectrum of **18** in  $\text{D}_2\text{O}$ . (S66)
46. **Supporting Information Figure 44.**  $^1\text{H}$  and  $^{13}\text{C}$  NMR spectra of **S10** in  $\text{CDCl}_3$ . (S67)
47. **Supporting Information Figure 45.**  $^{31}\text{P}$  NMR spectrum of **S10** in  $\text{CDCl}_3$ . (S68)
48. **Supporting Information Figure 46.**  $^1\text{H}$  and  $^{13}\text{C}$  NMR spectra of **S11** in  $\text{CDCl}_3$ . (S69)
49. **Supporting Information Figure 47.**  $^{31}\text{P}$  NMR spectrum of **S11** in  $\text{CDCl}_3$ . (S70)
50. **Supporting Information Figure 48.**  $^1\text{H}$  and  $^{13}\text{C}$  NMR spectra of **S12** in  $\text{CDCl}_3$ . (S71)
51. **Supporting Information Figure 49.**  $^{31}\text{P}$  NMR spectrum of **S12** in  $\text{CDCl}_3$ . (S72)
52. **Supporting Information Figure 50.**  $^1\text{H}$  and  $^{13}\text{C}$  NMR spectra of **16** in acetonitrile- $\text{d}_3$ . (S73)
53. **Supporting Information Figure 51.**  $^{31}\text{P}$  NMR spectrum of **16** in acetonitrile- $\text{d}_3$ . (S74)

**General Methods.** Oligonucleotides were synthesized on an Applied Biosystems Incorporated 394 oligonucleotide synthesizer. Oligonucleotide synthesis reagents were purchased from Glen Research (Sterling, VA). All chemicals were purchased from either Sigma-Aldrich or Fisher and were used without further purification. dNTPs and terminal deoxynucleotide transferase were obtained from New England Biolabs. DNA polymerase  $\beta$  was obtained from Trevigen.  $\alpha$ - $^{32}\text{P}$ -cordycepin was purchased from Perkin Elmer. C18-Sep-Pak cartridges were obtained from Waters. Quantification of radiolabeled oligonucleotides was carried out using a Molecular Dynamics Phosphorimager 840 equipped with ImageQuant Version 5.1 software. Fluorescence data were collected on a Varian Cary Eclipse fluorescence spectrophotometer.

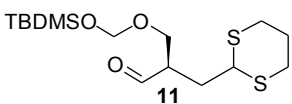

**Preparation of 11.** To a solution of  $\alpha,\alpha$ -diphenylprolinol trimethylsilyl ether catalyst (65.1 mg, 0.2 mmol) at 25 °C in toluene (4 mL) was added solid phosphate buffer pH 7 (50 mg) followed by aqueous formaldehyde solution (250  $\mu\text{L}$ , 3 mmol, 37 wt %). Aldehyde **10** (Kodama, T.; Greenberg, M. M. *J. Org. Chem.* **2005**, *70*, 9916.) (177 mg, 1 mmol) was added in one portion to the vigorously stirred suspension and the resulting mixture was stirred for 24 h. The 2 layers were then separated and the toluene was evaporated under reduced pressure (bath temperature < 40 °C). The residue was then redissolved in DCM (3 mL) and added to a premixed solution of imidazole (87.5 mg, 1.3 mmol) and TBDMSCl (150 mg, 1.3 mmol) in 2 mL of DCM that had been stirring for 20 min at 0 °C. The resulting mixture was stirred for 7 h at 0 °C before concentrating under vacuum. Purification on silica gel using 10 % EtOAc in hexanes afforded 105 mg (30 %) of **11**.  $^1\text{H}$  NMR ( $\text{CDCl}_3$ )  $\delta$  9.76 – 9.75 (m, 1H), 4.87 – 4.78 (m, 2H), 4.06 (t,  $J = 7.5$  Hz, 1H), 3.92 – 3.73 (m, 2H), 2.96 – 2.87 (m, 1H), 2.87 – 2.77 (m, 4H), 2.31 (dt,  $J = 14.8, 7.5$  Hz, 1H), 2.16 – 2.06 (m, 1H), 1.97 – 1.85



(m, 1H), 1.75 – 1.62 (m, 4H);  $^{13}\text{C}$  NMR ( $\text{CDCl}_3$ )  $\delta$  138.31, 138.29, 138.24, 138.0, 114.9, 114.69, 114.66, 114.63, 107.3, 105.3, 104.9, 104.7, 67.9, 67.6, 67.27, 67.17, 63.6, 60.7, 46.7, 44.5, 34.4, 32.2, 30.42, 30.35, 28.9, 28.8, 28.7; IR (film) 2937, 1640, 1445, 1362, 1230, 1091, 1044, 965, 909, 876  $\text{cm}^{-1}$ ; HRMS ( $\text{M} + \text{Na}^+$ ) calcd for  $\text{C}_{15}\text{H}_{26}\text{O}_4\text{Na}$  293.1723, found 293.1731.

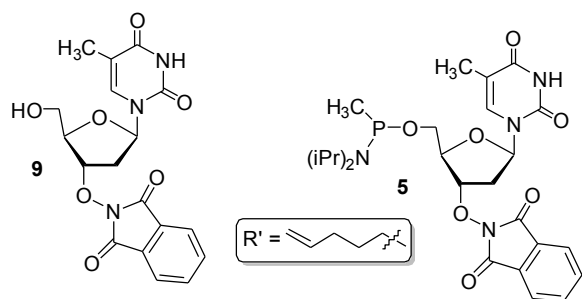

**Preparation of 5.** To a solution of **9**

(0.50 g, 1.3 mmol) in DCM (30 mL, the solubility in DCM is very poor) was added DIPEA (450  $\mu\text{L}$ , 2.6 mmol). The mixture was cooled to  $0^\circ\text{C}$  and *N,N*-diisopropylamino methyl

phosphonamidic chloride (0.36 mg, 2.0 mmol) was added dropwise. The mixture was allowed to warm to  $25^\circ\text{C}$  and stirred for 4 h. The solution becomes clear when the reaction is complete. The DCM layer was washed with  $\text{NaHCO}_3$  solution and then with brine. The organic phase was dried over  $\text{NaSO}_4$ . The solvent was evaporated under vacuum and the residue was purified by column chromatography using a mixture of DCM and EtOAc (1:1) with 1%  $\text{Et}_3\text{N}$ , yielding 0.41 g (60%) of **5** as white crystals.  $^1\text{H}$  NMR ( $\text{acetone-d}_6$ )  $\delta$  10.02 (br s, 1 H), 7.89 (m, 4 H), 7.68, 7.56 (each s, 1 H), 6.52 (m, 1 H), 5.08 (m, 1 H), 4.51 (m, 1 H), 3.85 (m, 2 H), 3.62 (m, 1 H), 3.53 (m, 2 H), 2.71 (dd, 1 H,  $J = 14.7, 5.6$  Hz), 2.37 (m, 1 H), 1.86 (dd, 3 H,  $J = 3.9, 1.1$  Hz), 1.17 (m, 9 H), 1.08 (t, 6 H,  $J = 7.1$  Hz);  $^{13}\text{C}$  NMR ( $\text{CDCl}_3$ )  $\delta$  205.2, 205.0, 163.6, 163.3, 150.3, 135.4, 135.3, 134.79, 134.77, 129.17, 129.15, 123.3, 110.1, 88.62, 88.55, 84.8, 84.5, 82.83, 82.76, 82.72, 82.66, 67.2, 66.5, 44.2, 44.0, 43.9, 36.5, 36.4, 25.3, 24.1, 23.5, 17.1, 17.0, 16.9, 11.73, 11.68;  $^{31}\text{P}$  NMR ( $\text{CDCl}_3$ )  $\delta$  125.25, 123.41. IR (film) 2966, 1753, 1681, 1466, 1363, 1277, 1184, 1123, 1062, 970, 876, 701  $\text{cm}^{-1}$ ; HRMS ( $\text{M} + \text{H}^+$ ) calcd for  $\text{C}_{25}\text{H}_{34}\text{N}_4\text{O}_7\text{P}$  533.2165, found 533.2155.



with 5 % methanol. This afforded 44 mg (81 %) of **7** as a white foam.  $^1\text{H}$  NMR ( $\text{CDCl}_3$ )  $\delta$  8.82 (s, 1H), 7.48, 7.45, 7.44, 7.43 (each d,  $J = 1.2$  Hz, 1H), 6.33 – 6.24 (m, 1H), 5.80 (m, 2H), 5.49 (s, 2H), 5.21 – 5.11 (m, 1H), 5.05 – 4.91 (m, 5H), 4.37 – 4.25 (m, 3H), 4.25 – 4.14 (m, 1H), 4.13 – 3.91 (m, 2H), 3.77 – 3.66 (m, 2H), 3.45 – 3.33 (m, 2H), 2.72 – 2.62 (m, 1H), 2.54 – 2.45 (m, 1H), 2.16 – 2.05 (m, 5H), 1.96 (m, 1H), 1.94, 1.93 (each d,  $J = 1.2$  Hz, 3H), 1.86 – 1.76 (m, 1H), 1.71 – 1.60 (m, 4H), 1.57 – 1.47 (m, 3H);  $^{13}\text{C}$  NMR ( $\text{CDCl}_3$ )  $\delta$  163.5, 150.3, 150.2, 138.23, 138.18, 138.17, 135.2, 135.1, 134.3, 123.5, 114.75, 114.69, 111.39, 111.38, 106.5, 106.3, 105.1, 104.49, 104.48, 102.3, 100.0, 85.1, 83.4, 83.3, 81.83, 81.77, 68.1, 67.71, 67.68, 67.4, 67.3, 65.91, 65.85, 65.8, 45.30, 45.26, 45.2, 36.80, 36.75, 34.4, 34.3, 30.32, 30.30, 28.79, 28.77, 12.53, 12.47, 11.9, 11.8, 10.4, 10.3;  $^{31}\text{P}$  NMR ( $\text{CDCl}_3$ )  $\delta$  31.99, 31.56, 31.19; IR (film) 2925, 1696, 1466, 1416, 1365, 1233, 1097, 988, 910, 820, 713  $\text{cm}^{-1}$ ; FAB-HRMS ( $\text{M} + \text{Na}^+$ ) calcd for  $\text{C}_{26}\text{H}_{42}\text{N}_3\text{O}_{10}\text{NaP}$  610.2500, found 610.2491.

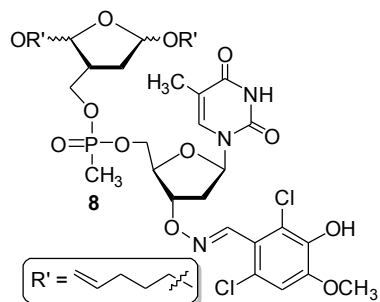

**Preparation of 8.** Alkoxyamine **7** (22 mg, 0.037 mmol)

was added to a solution of 2,6-dichloro-3-hydroxy-4-methoxy benzaldehyde (10 mg, 0.043 mmol) and acetic acid (10 mg, 10  $\mu\text{L}$ , 0.16 mmol) in DMSO (300  $\mu\text{L}$ ). The resulting mixture was incubated at 37°C for 5 h. DMSO was evaporated under high

vacuum and the residue was purified by column chromatography using 3 % methanol solution in DCM, affording 20.8 mg of **8** (79 %) as a colorless oil.  $^1\text{H}$  NMR ( $\text{CDCl}_3$ )  $\delta$  8.99, 8.97, 8.95 (each s, 1H), 8.32 (s, 1H), 7.52, 7.50, 7.48, 7.46 (each d,  $J = 1.2$  Hz, 1H), 6.87 (s, 1H), 6.46 (m, 1H), 6.32 (m, 1H), 5.85 – 5.74 (m, 2H), 5.13 (m, 1H), 5.02 – 4.92 (m, 6H), 4.43 – 4.01 (m, 5H), 3.93 (s, 3H), 3.70 (m, 2H), 3.39 (m, 2H), 2.68 (m, 2H), 2.25 – 2.04 (m, 6H), 1.95, 1.94 (each d,  $J = 1.2$  Hz, 3H), 1.86 – 1.74 (m, 2H), 1.71 – 1.60 (m, 4H), 1.59 – 1.49 (m, 3H);  $^{13}\text{C}$  NMR ( $\text{CDCl}_3$ )

$\delta$  163.5, 150.4, 148.1, 146.7, 141.8, 138.3, 138.19, 138.18, 135.2, 135.1, 125.4, 120.7, 120.2, 114.72, 114.71, 114.67, 114.66, 111.5, 111.3, 106.5, 106.4, 105.1, 104.50, 104.49, 85.3, 85.2, 82.5, 68.1, 67.70, 67.68, 67.4, 67.3, 56.6, 56.4, 45.3, 37.4, 37.3, 34.3, 30.32, 30.30, 28.80, 28.77, 12.54, 12.48, 10.44;  $^{31}\text{P}$  NMR ( $\text{CDCl}_3$ )  $\delta$  31.98, 31.52, 31.19; IR (film) 2940, 1690, 1599, 1491, 1275, 1245, 1061, 1008, 968, 915, 833, 767  $\text{cm}^{-1}$ ; HRMS ( $\text{M} + \text{Na}^+$ ) calcd for  $\text{C}_{34}\text{H}_{46}\text{N}_3\text{O}_{12}\text{NaPCl}_2$  812.2088, found 812.2111;  $\epsilon_{268} = 24,240 \text{ cm}^{-1}\text{M}^{-1}$  in MeCN.

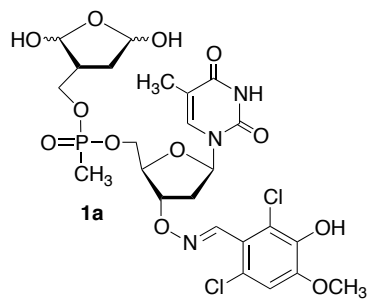

**Preparation of 1a.** To a solution of **8** (23 mg, 0.029 mmol) in MeCN (with 1 % water) (0.5 mL) was added solution of NBS (12.9 mg, 0.073 mmol) in MeCN (0.1 mL) at  $-5^\circ\text{C}$ . The reaction mixture was stirred for 3 min, at which time it was quenched with 0.1 mL of a saturated solution of  $\text{Na}_2\text{S}_2\text{O}_3$  and  $\text{NaHCO}_3$ . The organic layer was separated and the solvent was evaporated under reduced pressure at RT. The residue was redissolved in 100  $\mu\text{L}$  MeCN / water mixture (1:4) and loaded on C18 silica gel column, made from a Pasteur pipette (1.5 g silica). The product was eluted using a mixture of MeCN and water: 3 $\times$ 1 mL of 20 % MeCN; 3 $\times$ 1 mL of 30 % MeCN; 3 $\times$ 1 mL of 50 % (Total: 9 fractions 1 mL each). Two main components were isolated as a mixture (fraction 8), representing the cyclic and the dialdehyde forms – 10.5 mg (56 %).  $^1\text{H}$  NMR ( $\text{CD}_3\text{CN}$ )  $\delta$  8.28 (s, 1H), 7.45 (s, 1H), 7.00 (s, 1H), 6.31 – 6.21 (m, 1H), 5.50 – 4.84 (m, 3H), 4.40 – 4.31 (m, 1H), 4.27 – 4.18 (m, 2H), 4.10 – 3.90 (m, 2H), 3.82 (s, 3H), 3.75 – 3.52 (m, 2H), 3.48 – 3.25 (m, 2H), 2.62 – 2.44 (m, 1H), 2.37 – 2.16 (m, 2H), 1.81 (m, 4H), 1.63 – 1.37 (m, 6H);  $^{31}\text{P}$  NMR ( $\text{CD}_3\text{CN}$ )  $\delta$  32.08, 32.05, 32.00, 31.93, 31.90, 31.87, 31.83, 31.81, 31.74, 31.62, 31.59, 31.55, 31.52, 31.48, 31.45, 31.44, 31.42, 31.35, 31.31, 22.81; HRMS ( $\text{M} + \text{H}^+$ ) calcd for  $\text{C}_{24}\text{H}_{29}\text{Cl}_2\text{N}_3\text{O}_{11}\text{P}$  636.0917, found 636.0931;  $\epsilon_{270} = 20,000 \text{ cm}^{-1}\text{M}^{-1}$  in 50 % MeCN in water.



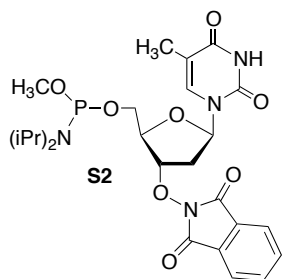

**Preparation of the methoxy phosphoramidite of 9 (S2).** To a solution of alcohol **9** (200 mg, 0.50 mmol) and DIPEA (260 mg, 2.00 mmol) in DCM (5 mL) was added N,N-diisopropylamino methoxy phosphoramidic chloride (157 mg, 0.80 mmol) at 0°C. The resulting solution was stirred at 25 °C for 1 h. The solvent was evaporated and the residue was purified by column chromatography using a gradient 10 % - 20 % EtOAc in DCM with 1 % of Et<sub>3</sub>N, yielding 160 mg (60 %) of **S2**. <sup>1</sup>H NMR (CD<sub>3</sub>CN) δ 9.20 (s, 1H), 7.84 (m, 4H), 7.63, 7.55 (each m, 1H), 6.42 (td, *J* = 8.5, 5.6 Hz, 1H), 4.99 (m, 1H), 4.45 (m, 1H), 3.77 (m, 2H), 3.49 (m, 2H), 3.37, 3.33 (each d, *J* = 13.4 Hz, 3H), 2.62, 2.59 (each d, *J* = 6.2, 1H), 2.27 (m, 1H), 1.85, 1.84 (each d, *J* = 0.5 Hz, 3H), 1.13 (m, 12H); <sup>13</sup>C NMR (CD<sub>3</sub>CN) δ 164.0, 163.6, 150.52, 150.46, 135.7, 135.5, 134.8, 129.1, 123.3, 117.3, 110.5, 88.4, 88.3, 84.6, 84.4, 82.29, 82.26, 82.20, 82.16, 63.8, 63.7, 62.9, 62.7, 50.2, 50.1, 49.9, 49.1, 44.95, 44.89, 42.66, 42.54, 36.3, 36.0, 24.04, 24.02, 24.01, 23.97, 23.95, 23.94, 23.90, 22.28, 22.26, 22.05, 22.04, 20.1, 11.6; <sup>31</sup>P NMR (CD<sub>3</sub>CN) δ 149.46, 149.23; IR (film) 2967, 1735, 1682, 1465, 1364, 1184, 970, 876, 700 cm<sup>-1</sup>; MALDI-TOF MS (*M* + Na<sup>+</sup>) calcd for C<sub>25</sub>H<sub>33</sub>N<sub>4</sub>NaO<sub>8</sub>P 571.2, found 571.2.

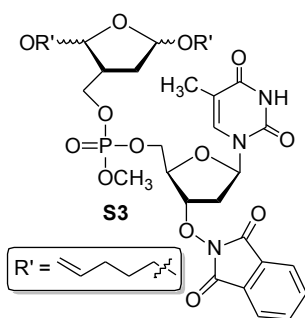

**Coupling of methoxy phosphoramidite with 4 (S3).** The above methoxy phosphoramidite (**S2**, 52 mg, 0.10 mmol) and **4** (27 mg, 0.10 mmol) were dissolved in anhydrous MeCN (0.5 mL). 5-Ethylthio-1H-tetrazole (0.50 mL, 0.13 mmol, 0.25 M solution in MeCN) was added to the reaction mixture via syringe under argon and the resulting solution was stirred for an hour at RT. *t*-BuOOH in decane (0.10 mL, 5 M solution) was added to the reaction mixture and stirred for additional 20 min. The solvents were evaporated under vacuum and the residue was purified by column chromatography using DCM

with 3 % MeOH, yielding 60 mg (82 %) of **S3**.  $^1\text{H}$  NMR ( $\text{CDCl}_3$ )  $\delta$  9.13 (d,  $J = 4.7$  Hz, 1H), 7.83, 7.77 (each m, 4H), 7.37 (m, 1H), 6.47 (m, 1H), 5.78 (m, 2H), 5.12 (m, 1H), 4.96 (m, 6H), 4.54 (s, 1H), 4.31 (m, 2H), 4.02 (m, 2H), 3.76 (m, 3H), 3.68 (m, 2H), 3.37 (m, 2H), 2.76 (ddd,  $J = 14.4, 5.8, 1.8$  Hz, 1H), 2.66 (m, 1H), 2.24 (m, 1H), 2.07 (m, 6H), 1.90 (s, 3H), 1.81 (m, 1H), 1.64 (m, 4H);  $^{13}\text{C}$  NMR ( $\text{CDCl}_3$ )  $\delta$  163.74, 163.73, 163.68, 150.2, 138.22, 138.21, 138.17, 138.15, 135.4, 134.9, 128.7, 123.9, 114.71, 114.69, 114.67, 114.60, 111.49, 111.44, 107.2, 106.2, 106.1, 105.1, 104.8, 104.5, 87.6, 87.5, 85.37, 85.31, 81.1, 81.0, 68.0, 67.68, 67.67, 67.65, 67.34, 67.25, 63.4, 54.70, 54.69, 49.9, 46.7, 45.20, 45.18, 45.14, 45.11, 36.6, 34.16, 34.10, 30.34, 30.30, 30.27, 28.84, 28.81, 28.76, 22.93, 22.91, 12.42, 12.40;  $^{31}\text{P}$  NMR ( $\text{CDCl}_3$ )  $\delta$  0.07, 0.02, -0.00, -0.03, -0.09; IR (film) 2937, 1735, 1690, 1467, 1369, 1276, 1017, 877, 703  $\text{cm}^{-1}$ ; HRMS ( $\text{M} + \text{Na}^+$ ) calcd for  $\text{C}_{34}\text{H}_{44}\text{N}_3\text{NaO}_{13}\text{P}$  756.2509, found 756.2496.

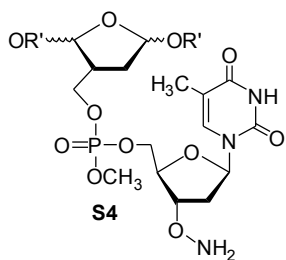

**Preparation of the alkoxyamine S4.** To a solution of **S3** (60

mg, 0.08 mmol) in THF (0.5 mL) was added hydrazine (0.05 mL, 6 % solution in water) and the mixture was stirred for 5 min at 25 °C. The volatile components were evaporated under vacuum and the residue was

purified by column chromatography using DCM with 4.5 % MeOH, yielding 38 mg (77 %) of **S4**.  $^1\text{H}$  NMR ( $\text{CDCl}_3$ )  $\delta$  9.14 (s, 1H), 7.43 (m, 1H), 6.31 (m, 1H), 5.80 (m, 2H), 5.48 (s, 2H), 5.13 (m, 1H), 4.98 (m, 5H), 4.36 (m, 1H), 4.28 (m, 3H), 4.05 (m, 2H), 3.80, 3.79 (each d,  $J = 11.2$  Hz, 3H), 3.69 (m, 2H), 3.37 (m, 2H), 2.68 (m, 1H), 2.47 (ddd,  $J = 14.0, 5.7, 1.6$  Hz, 1H), 2.08 (m, 5H), 1.98 (m, 1H), 1.92 (t,  $J = 1.4$  Hz, 3H), 1.81 (m, 1H), 1.65 (m, 4H);  $^{13}\text{C}$  NMR ( $\text{CDCl}_3$ )  $\delta$  163.7, 150.45, 150.43, 138.21, 138.16, 138.15, 135.2, 134.2, 123.5, 114.74, 114.73, 114.72, 114.69, 111.5, 111.4, 106.27, 106.24, 106.20, 105.1, 104.5, 84.9, 83.42, 83.40, 83.38, 81.62, 81.54, 68.10, 68.04, 68.0, 67.71, 67.69, 67.4, 54.62, 54.60, 54.56, 54.55, 45.21, 45.14, 36.72,

36.68, 34.21, 34.20, 34.18, 30.31, 30.30, 30.28, 28.77, 28.75, 12.44, 12.43;  $^{31}\text{P}$  NMR ( $\text{CDCl}_3$ )  $\delta$  0.37, 0.35, 0.31, 0.28, 0.19, 0.17, 0.15, 0.13; IR (film) 2937, 1691, 1467, 1274, 1032, 857  $\text{cm}^{-1}$ ; HRMS ( $\text{M} + \text{Na}^+$ ) calcd for  $\text{C}_{26}\text{H}_{42}\text{N}_3\text{NaO}_{11}\text{P}$  626.2455, found 626.2460.

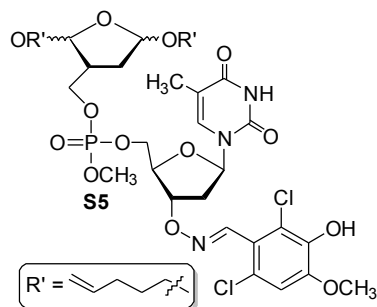

### Preparation of the oxime of the methyl phosphate

**triester (S5).** A solution of **S4** (32 mg, 0.05 mmol), 2,6-dichloro-3-hydroxy-4-methoxybenzaldehyde (15.5 mg, 0.07 mmol) and AcOH (9 mg, 0.15 mmol) in DMSO (0.5 mL) was incubated at 37 °C overnight. The DMSO was evaporated under vacuum and

the residue was purified by column chromatography using DCM with 3 % MeOH, yielding 36 mg (84 %) of the oxime as a foam.  $^1\text{H}$  NMR ( $\text{CDCl}_3$ )  $\delta$  9.17 (s, 1H), 8.31 (s, 1H), 7.48 (m, 1H), 6.86 (s, 1H), 6.50 (m, 1H), 6.40 (s, 1H), 5.80 (m, 2H), 5.13 (dt,  $J = 5.3, 2.5$  Hz, 1H), 4.98 (m, 6H), 4.42 (m, 1H), 4.32 (m, 2H), 4.06 (m, 2H), 3.92 (s, 3H), 3.81 (m, 3H), 3.71 (m, 2H), 3.38 (m, 2H), 2.62 (m, 2H), 2.18 (m, 1H), 2.09 (q,  $J = 6.9$  Hz, 5H), 1.95 (s, 3H), 1.80 (m, 1H), 1.65 (p,  $J = 7.6$  Hz, 4H);  $^{13}\text{C}$  NMR ( $\text{CDCl}_3$ )  $\delta$  163.6, 150.5, 148.2, 146.8, 141.8, 138.24, 138.17, 135.2, 125.4, 120.6, 120.2, 114.72, 114.67, 111.71, 111.66, 111.3, 106.24, 106.21, 104.5, 102.3, 85.0, 82.5, 82.2, 82.1, 67.7, 67.4, 66.9, 56.6, 54.65, 54.60, 45.22, 45.15, 37.3, 34.18, 34.15, 30.31, 30.30, 30.29, 28.85, 28.77, 28.76, 12.5;  $^{31}\text{P}$  NMR ( $\text{CDCl}_3$ )  $\delta$  0.28, 0.26, 0.09, 0.04; IR (film) 2941, 1690, 1439, 1275, 1017, 953  $\text{cm}^{-1}$ ; HRMS ( $\text{M} + \text{Na}^+$ ) calcd for  $\text{C}_{34}\text{H}_{46}\text{Cl}_2\text{N}_3\text{NaO}_{13}\text{P}$  828.2043, found 828.2044.

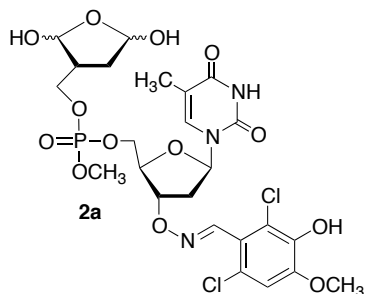

**Preparation of 2a.** To a solution of **S5** (10 mg, 0.012 mmol) in MeCN (0.5 mL) with 1 % water was added NBS (6 mg, 0.035 mmol) in MeCN (0.06 mL) at 0°C. The solution was stirred for 5 min before it was quenched with 1:1 mixture of saturated

solutions of Na<sub>2</sub>S<sub>2</sub>O<sub>3</sub> and NaHCO<sub>3</sub> (0.03 mL). The organic layer was separated and the solvent was evaporated under vacuum. The residue was redissolved in a mixture of water and MeCN (1:1) (0.04 mL) and then diluted with water (0.06 mL) before it was loaded on the column (the solution becomes cloudy after the dilution because of poor solubility of the product). The product was purified on a column made of a Pasteur pipette (with 1 g of C18 silica) using a gradient 20 % - 50 % MeCN in water (collected about 12 fractions 1 mL each). The fractions containing the desired product were combined and lyophilized, yielding 5.5 mg (66 %) of **2a** as a white powder. <sup>1</sup>H NMR (CD<sub>3</sub>CN) δ 8.31 (s, 1H), 7.45 (s, 1H), 7.03 (s, 1H), 6.29 (m, 1H), 5.46 - 5.16 (m, 2H), 4.94 (m, 1H), 4.36 (m, 1H), 4.29 (m, 2H), 4.03 (m, 2H), 3.87 (s, 3H), 3.75 (m, 3H), 2.52 (m, 2H), 2.31 (m, 2H), 1.84 (m, 4H); <sup>31</sup>P NMR (CD<sub>3</sub>CN) δ -0.16, -0.25; MALDI-TOF MS (dialdehyde form M + Na<sup>+</sup>) calcd for C<sub>24</sub>H<sub>28</sub>Cl<sub>2</sub>N<sub>3</sub>NaO<sub>12</sub>P 674.068, found 673.759.

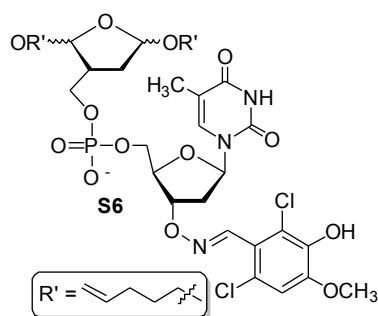

**Preparation of S6.** To a solution of **S5** (95 mg, 0.12 mmol) in DMF (0.5 mL) was added disodium 2-carbamoyl-2-cyanoethylene-1,1-dithiolate (See: Söderbück, E. *Acta. Chem. Scand.* **1970**, *24*, 228-234 for preparation of the reagent.) (61.9 mg, 0.24 mmol) in DMF (0.5 mL) and the mixture was incubated

at 25 °C for 1 h. DMF was evaporated under vacuum and the residue was purified by C18 silica using a gradient 20 % - 50 % MeCN in water. The fractions containing the desired product were lyophilized yielding 94 mg (99 %) of **S6** as white powder. The sodium salt was converted to TBA (tetrabutylammonium) salt using Dowex 50WX8-400 cation exchange resin. A Pasteur pipette was loaded with 1 mL of slurry (1.7 meq / mL) and washed with a solution of TBA-OH until protons are fully exchanged by TBA (pH of the collected solution becomes basic). The column is washed with distilled water several times (to wash out the excess TBA-OH). The

solution of compound in water (0.5 mL) was passed through the column very slowly (1 drop per second). The column is washed with 30 % MeCN in water until (the TBA salt is very hydrophobic and is not fully soluble in water) all the material comes out. The solutions were combined and lyophilized yielding 113 mg (93 %) of **S6** as a white powder.  $^1\text{H}$  NMR (MeOH- $d_4$ )  $\delta$  8.32 (s, 1H), 7.90 (d,  $J = 1.2$  Hz, 1H), 7.02 (s, 1H), 6.46 (m, 1H), 5.81 (m, 2H), 5.12 (m, 1H), 5.06 (d,  $J = 6.3$  Hz, 1H), 5.02 (m, 2H), 4.98 (m, 1H), 4.92 (m, 2H), 4.41 (m, 1H), 4.14 (m, 2H), 3.91 (s, 3H), 3.84 (m, 2H), 3.67 (m, 2H), 3.35 (m, 2H), 3.23 (m, 8H), 2.56 (m, 2H), 2.43 (m, 1H), 2.08 (m, 5H), 1.96 (s, 3H), 1.90 (m, 1H), 1.65 (m, 12H), 1.41 (h,  $J = 7.4$  Hz, 8H), 1.02 (t,  $J = 7.4$  Hz, 12H);  $^{13}\text{C}$  NMR (MeOH- $d_4$ )  $\delta$  165.0, 149.2, 146.31, 146.29, 142.8, 138.15, 138.13, 136.6, 123.9, 120.7, 120.5, 113.7, 111.2, 110.8, 106.69, 106.65, 104.81, 104.78, 84.9, 83.8, 83.4, 83.3, 67.21, 67.19, 66.97, 66.95, 65.61, 65.56, 65.27, 65.21, 65.17, 58.12, 58.09, 58.06, 55.7, 45.45, 45.37, 36.8, 33.75, 33.67, 30.1, 28.74, 28.71, 23.4, 19.34, 19.33, 19.31, 12.58, 12.57, 11.4;  $^{31}\text{P}$  NMR (MeOH- $d_4$ )  $\delta$  0.08, 0.03, -0.03, -0.04; IR (film) 2936, 1688, 1466, 1238, 1056, 957, 831, 732; HRMS ( $M^+$ ) calcd for  $\text{C}_{33}\text{H}_{43}\text{Cl}_2\text{N}_3\text{O}_{13}\text{P}$  790.1916, found 790.1904.

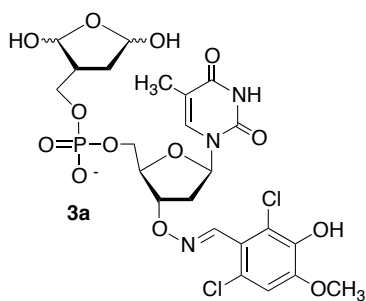

**Preparation of 3a.** To a solution of **S6** (6 mg, 0.006 mmol) in MeCN (0.6 mL) with 3 % water and phosphate solid buffer pH 7 (20 mg) was added NBS (3.2 mg, 0.018 mmol) in MeCN (0.05 mL) under vigorous stirring at 0°C. The stirring was continued for 5 min and a 1:1 mixture of saturated solutions of  $\text{Na}_2\text{S}_2\text{O}_3$  and  $\text{NaHCO}_3$  (0.1 mL) was added. The reaction flask was connected to vacuum and MeCN was evaporated. The residue (water and salts) was diluted with water and purified by C18 silica (1 g) on a column made of a Pasteur pipette using a gradient 5 % - 20 % MeCN in water (collected about 12 fractions 1 mL each). The fractions were combined and lyophilized yielding

1.4 mg (33 %) of **3a** as white powder.  $^1\text{H}$  NMR ( $\text{D}_2\text{O}$ )  $\delta$  8.30 (s, 1H), 7.89 (s, 1H), 6.99 (s, 1H), 6.45 (m, 1H), 5.62 - 5.33 (m, 2H), 5.06 (m, 2H), 4.49 (m, 2H), 4.15 (m, 1H), 4.07 (m, 2H), 3.87 (s, 3H), 2.62 (m, 2H), 2.46 (m, 2H), 1.91 (m, 4H);  $^{31}\text{P}$  NMR (162 MHz,  $\text{D}_2\text{O}$ )  $\delta$  2.16, -0.07, -0.12; MALDI-TOF MS (dialdehyde form  $\text{M} + \text{Na}^+$ ) calcd for  $\text{C}_{23}\text{H}_{26}\text{Cl}_2\text{N}_3\text{NaO}_{12}\text{P}$  660.053, found 660.010.

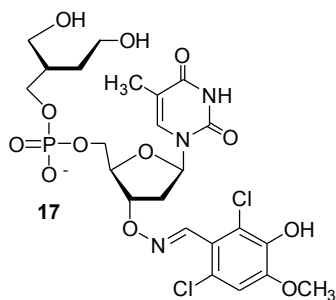

**Preparation of 17.** A solution of **3a** (20  $\mu\text{L}$ , 5 mM) in water was reduced with  $\text{NaBH}_4$  (2  $\mu\text{L}$ , 100 mM). The excess reducing agent was quenched with AcOH after 5 min. TLC analysis of the product (eluted with 40 % MeCN in water on C18 silica plates) shows a similar  $R_f$  with the starting material. MALDI-TOF MS (diol form  $\text{M} + \text{Na}^+$ ) calcd for  $\text{C}_{23}\text{H}_{30}\text{Cl}_2\text{N}_3\text{NaO}_{12}\text{P}$  664.084, found 660.043.

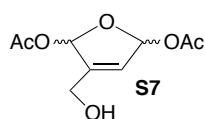

**Preparation of S7.** To a suspension of  $\text{Pb}(\text{OAc})_4$  (2 g, 4.5 mmol) in glacial AcOH (10 mL) was added 3-hydroxymethylfuran (400 mg, 4.1 mmol) and the mixture was stirred at 25  $^\circ\text{C}$  for 20 h (the solution becomes clear). AcOH was evaporated and  $\text{Et}_2\text{O}$  was added to the residue. The precipitate was filtered, the filtrate was collected, evaporated and the residue was purified by column chromatography using DCM with 30 % EtOAc, yielding 600 mg (68 %) of **S7** as a mixture of 2 major isomers (ratio 2:1, according to  $^1\text{H}$  NMR).  $^1\text{H}$  NMR ( $\text{CDCl}_3$ )  $\delta$  6.94 (m, 1H), 6.74 (m, 1H), 6.09 (m, 1H), 4.33 (m, 2H), 2.13, 2.10 (each d,  $J = 12.8$  Hz, 6H);  $^{13}\text{C}$  NMR ( $\text{CDCl}_3$ )  $\delta$  170.35, 170.34, 170.0, 169.9, 145.5, 145.3, 125.0, 124.7, 101.3, 100.6, 99.99, 99.91, 99.4, 57.6, 57.5, 21.16, 21.14, 21.05; IR (film) 1737, 1374, 1222, 1178, 967  $\text{cm}^{-1}$ ; HRMS ( $\text{M} + \text{NH}_4^+$ ) calcd for  $\text{C}_9\text{H}_{16}\text{NO}_6$  234.0972, found 234.0980.

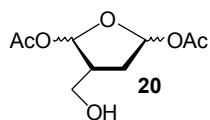

**Preparation of 20.** A solution of **S7** (600 mg, 2.7 mmol) in EtOAc (60 mL) was placed in a hydrogenation apparatus. 5 % Rhodium on alumina

(300 mg) was added and the hydrogenation was carried out at 70 psi for 14 h. The solution was filtered off through alumina and the EtOAc was evaporated in vacuo. The residue was purified by silica gel chromatography using DCM with 50 % EtOAc to elute the first diastereomer **20a** (90 mg), followed by 60 % EtOAc to elute the second component **20b**, which represent a mixture of several diastereomers, but the major one represent about 90 % (170 mg) of the mixture. Total amount of isolated material represented 260 mg (44 %). **20a**:  $^1\text{H}$  NMR ( $\text{CDCl}_3$ )  $\delta$  6.41 (dd,  $J = 5.9, 1.2$  Hz, 1H), 6.33 (s, 1H), 3.81 (m, 1H), 3.67 (m, 1H), 2.49 (m, 2H), 2.04 (d,  $J = 1.9$  Hz, 6H), 1.85 (m, 1H);  $^{13}\text{C}$  NMR ( $\text{CDCl}_3$ )  $\delta$  170.0, 169.7, 100.6, 98.5, 62.6, 45.9, 31.9, 21.18, 21.17; IR (film) 1737, 1365, 1225, 1093, 964  $\text{cm}^{-1}$ ; HRMS ( $\text{M} + \text{NH}_4^+$ ) calcd for  $\text{C}_9\text{H}_{18}\text{NO}_6$  236.1129, found 236.1134. **20b**:  $^1\text{H}$  NMR ( $\text{CDCl}_3$ )  $\delta$  6.31 (m, 2H), 3.68 (m, 2H), 2.63 (m, 1H), 2.41 (m, 1H), 2.10 (m, 6H), 1.84 (m, 1H);  $^{13}\text{C}$  NMR ( $\text{CDCl}_3$ )  $\delta$  170.5, 170.1, 99.08, 99.06, 99.03, 98.7, 98.2, 71.5, 71.0, 68.5, 64.5, 64.2, 60.8, 60.4, 48.1, 46.8, 45.4, 39.8, 39.1, 35.1, 34.8, 31.8, 25.2, 21.4, 21.21, 21.17; IR (film) 1737, 1371, 1227, 1102, 958  $\text{cm}^{-1}$ ; HRMS ( $\text{M} + \text{NH}_4^+$ ) calcd for  $\text{C}_9\text{H}_{18}\text{NO}_6$  236.1129, found 236.1128.

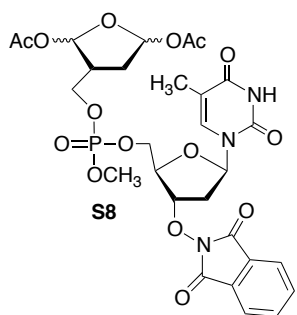

**Preparation of S8.** To a solution of **20b** (170 mg, 0.33 mmol) and **S2** (60 mg, 0.27 mmol) in anhydrous MeCN (2 mL) was added a solution of 5-ethylthio-1H-tetrazole in MeCN (1.32 mL, 0.33 mmol, 0.25 M solution). The resulting mixture was stirred for 1 h at 25 °C at which time *t*-BuOOH in decane (0.20 mL, 5 M solution) was added and the mixture was stirred for an additional 20 min. The solvents were evaporated under vacuum and the residue was purified by column chromatography using DCM with 3 % MeOH, yielding 160 mg (87 %) of **S8** as a mixture of 4 diastereomers, according to the  $^{31}\text{P}$  NMR spectrum.  $^1\text{H}$  NMR ( $\text{CDCl}_3$ )  $\delta$  9.34 (s, 1H), 7.79 (m, 4H), 7.36 (s, 1H), 6.44 (m, 1H), 6.38 (m,

1H), 6.33 (m, 1H), 5.00 (m, 1H), 4.54 (s, 1H), 4.33 (m, 2H), 4.14 (m, 2H), 3.77 (ddd,  $J = 11.5$ , 6.2, 5.5 Hz, 3H), 2.75 (m, 1H), 2.64 (m, 1H), 2.49 (m, 1H), 2.31 (m, 1H), 2.03 (m, 3H), 1.98 (m, 3H), 1.88 (m, 3H), 1.81 (m, 1H);  $^{13}\text{C}$  NMR ( $\text{CDCl}_3$ )  $\delta$  169.53, 169.51, 169.50, 169.47, 169.43, 163.86, 163.84, 163.76, 163.74, 150.23, 150.20, 135.8, 134.9, 128.7, 123.9, 111.43, 111.39, 111.37, 111.28, 99.30, 99.25, 99.22, 98.12, 98.10, 98.05, 87.4, 85.6, 81.1, 81.0, 67.3, 66.9, 54.90, 54.87, 54.84, 54.81, 54.79, 54.76, 44.15, 44.13, 44.11, 44.08, 44.06, 44.04, 36.56, 36.48, 36.43, 36.39, 31.60, 31.58, 31.56, 31.54, 27.0, 21.16, 21.14, 21.04, 21.02, 21.01, 14.9, 12.4;  $^{31}\text{P}$  NMR ( $\text{CDCl}_3$ )  $\delta$  -0.15, -0.31, -0.43, -0.53; IR (film) 2345, 1731, 1687, 1467, 1367, 1227, 1016, 970, 877, 731, 701  $\text{cm}^{-1}$ ; HRMS ( $\text{M} + \text{Na}^+$ ) calcd for  $\text{C}_{28}\text{H}_{32}\text{N}_3\text{NaO}_{15}\text{P}$  704.1469, found 704.1463.

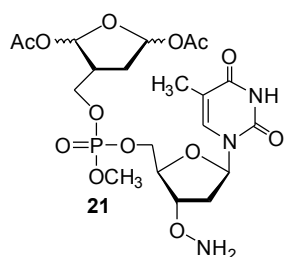

**Preparation of 21.** The above phthalimide, **S8** (160 mg, 0.23

mmol) in THF (3 mL) was treated with hydrazine (0.2 mL, 6 % solution in water) for 10 min. TLC analysis shows complete reaction. The volatile components were evaporated under vacuum and the residue was

purified by column chromatography using DCM with 4.5 % MeOH, yielding 60 mg (48 %) of free **21** as a mixture of 4 diastereomers according to the  $^{31}\text{P}$  NMR spectrum.  $^1\text{H}$  NMR ( $\text{CDCl}_3$ )  $\delta$  9.28 (s, 1H), 7.42 (s, 1H), 6.41 (m, 1H), 6.36 (m, 1H), 6.29 (m, 1H), 5.60 (s, 2H), 4.35 (m, 1H), 4.28 (m, 3H), 4.14 (m, 2H), 3.80 (ddd,  $J = 11.2$ , 4.6, 2.8 Hz, 3H), 2.65 (m, 1H), 2.51 (m, 2H), 2.04 (m, 6H), 1.98 (m, 1H), 1.92 (m, 3H), 1.81 (m, 1H);  $^{13}\text{C}$  NMR ( $\text{CDCl}_3$ )  $\delta$  169.50, 169.48, 169.47, 169.45, 169.44, 169.43, 169.42, 163.81, 163.80, 150.47, 150.45, 135.36, 135.34, 135.33, 134.3, 123.4, 111.44, 111.42, 111.40, 111.32, 99.23, 99.21, 99.19, 99.17, 98.09, 98.08, 98.06, 98.05, 85.03, 84.98, 84.96, 83.36, 83.34, 83.28, 81.62, 81.60, 81.58, 81.52, 68.23, 68.22, 68.18, 68.17, 68.16, 66.88, 66.87, 66.84, 66.83, 66.81, 66.79, 54.78, 54.75, 54.72, 54.70, 54.69, 54.65, 44.15, 44.13, 44.11, 44.08, 44.06, 44.05, 44.01, 36.63, 36.58, 31.62, 31.59, 31.57, 21.16, 21.14,



21.08, 21.07, 12.40, 12.39;  $^{31}\text{P}$  NMR ( $\text{CDCl}_3$ )  $\delta$  0.14, -0.05, -0.12, -0.18; IR (film) 2345, 1745, 1688, 1470, 1367, 1227, 1099, 1004, 968, 906  $\text{cm}^{-1}$ ; HRMS ( $\text{M} + \text{Na}^+$ ) calcd for  $\text{C}_{20}\text{H}_{30}\text{N}_3\text{NaO}_{13}\text{P}$  574.1414, found 574.1424.

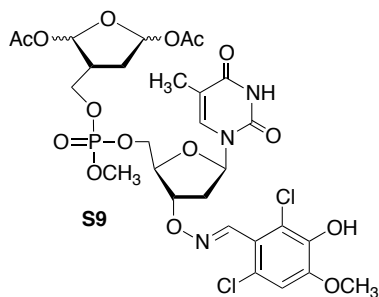

**Preparation of S9.** A solution of **21** (30 mg, 0.05 mmol), 2,6-dichloro-3-hydroxy-4-methoxybenzaldehyde (15 mg, 0.07 mmol) and AcOH (9 mg, 0.15 mmol) in DMSO (0.5 mL) was incubated at 37 °C overnight. The DMSO was evaporated under vacuum and the residue was purified by column chromatography using DCM with 3 % MeOH, yielding 45 mg (100 %) of the oxime as a foam.  $^1\text{H}$  NMR ( $\text{CDCl}_3$ )  $\delta$  9.46 (s, 1H), 8.28 (s, 1H), 7.44 (s, 1H), 6.83 (s, 1H), 6.44 (m, 1H), 6.39 (m, 1H), 6.33 (m, 1H), 4.94 (m, 1H), 4.40 (m, 1H), 4.33 (m, 2H), 4.15 (m, 2H), 3.89 (s, 3H), 3.79 (ddd,  $J = 11.2, 3.9, 1.7$  Hz, 3H), 2.64 (m, 1H), 2.49 (m, 1H), 2.17 (m, 1H), 2.00 (m, 6H), 1.91 (s, 3H), 1.80 (m, 1H);  $^{13}\text{C}$  NMR ( $\text{CDCl}_3$ )  $\delta$  169.42, 169.39, 163.81, 163.80, 150.55, 150.54, 148.4, 146.8, 142.1, 135.3, 125.1, 120.5, 120.4, 111.54, 111.53, 111.51, 111.45, 111.3, 99.22, 99.19, 99.16, 98.04, 98.00, 85.0, 82.3, 82.1, 67.9, 66.8, 56.6, 54.79, 54.76, 54.73, 54.70, 54.67, 44.13, 44.06, 40.8, 37.19, 37.14, 31.60, 31.58, 31.56, 21.15, 21.14, 21.13, 21.05, 21.04, 12.4;  $^{31}\text{P}$  NMR ( $\text{CDCl}_3$ )  $\delta$  0.01, -0.10, -0.20, -0.28; IR (film) 2957, 1749, 1690, 1275, 1228, 1017, 970, 862  $\text{cm}^{-1}$ ; HRMS ( $\text{M} + \text{Na}^+$ ) calcd for  $\text{C}_{28}\text{H}_{34}\text{Cl}_2\text{N}_3\text{NaO}_{15}\text{P}$  776.1002, found 776.0981.

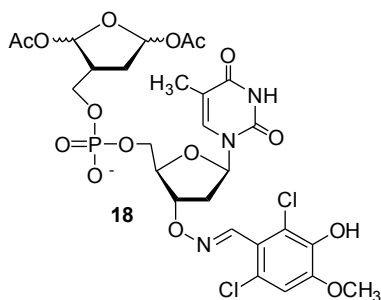

**Preparation of 18.** To a solution of the above oxime (45 mg, 0.06 mmol) in DMF (0.2 mL) was added disodium 2-carbamoyl-2-cyanoethylene-1,1-dithiolate (31.2 mg, 0.12 mmol) in DMF (0.2 mL) and the mixture was incubated at 25 °C for 1h. DMF was evaporated under vacuum and the residue was purified

by C18 silica using a gradient 10 % - 40 % MeCN in water. The fractions containing the desired product were lyophilized yielding 32 mg (78 %) of sodium salt **18** as white powder.  $^1\text{H}$  NMR ( $\text{D}_2\text{O}$ )  $\delta$  8.11 (s, 1H), 7.72 (s, 1H), 6.76 (s, 1H), 6.35 (m, 1H), 6.25 (d,  $J = 5.3$  Hz, 1H), 6.21 (d,  $J = 8.5$  Hz, 1H), 5.00 (m, 1H), 4.41 (s, 1H), 4.13 (m, 2H), 3.97 (m, 2H), 3.81 (s, 3H), 2.65 (q,  $J = 8.5$  Hz, 1H), 2.56 (m, 1H), 2.49 (p,  $J = 8.2, 7.2$  Hz, 1H), 2.35 (dt,  $J = 14.9, 7.5$  Hz, 1H), 2.03 (m, 6H), 1.90 (m, 1H), 1.86 (s, 3H);  $^{13}\text{C}$  NMR ( $\text{D}_2\text{O}$ )  $\delta$  172.60, 172.56, 172.49, 166.10, 166.08, 151.1, 149.2, 142.5, 137.1, 123.9, 120.0, 119.2, 111.21, 111.20, 100.1, 98.9, 83.1, 56.2, 30.8, 20.55, 20.45, 11.7;  $^{31}\text{P}$  NMR ( $\text{D}_2\text{O}$ )  $\delta$  -0.28, -0.29; HRMS ( $\text{M}^-$ ) calcd for  $\text{C}_{27}\text{H}_{31}\text{Cl}_2\text{N}_3\text{O}_{15}\text{P}$  738.0875, found 738.0874;  $\epsilon_{270\text{ nm}} = 18800\text{ cm}^{-1}\text{M}^{-1}$  in water.

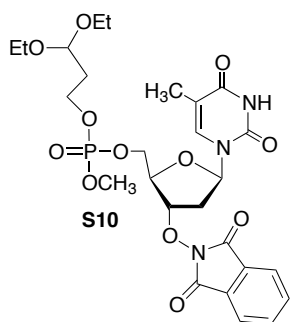

**Preparation of S10.** To a solution of **S2** (52 mg, 0.1 mmol) and 3,3-diethoxy-1-propanol (19 mg, 0.13 mmol) in anhydrous MeCN (0.5 mL) was added a solution of 5-ethylthio-1H-tetrazole in MeCN (0.5 mL, 0.13 mmol, 0.25 M solution) and the resulting mixture was stirred for 1 h at 25 °C. *t*-BuOOH in decane (0.10 mL, 5 M solution) was

added to the reaction mixture and stirring was continued for an additional 20 min. The solvents were evaporated under vacuum and the residue was purified by column chromatography using DCM with 3.5 % MeOH, yielding 40 mg (65 %) of **S10** as a mixture of 2 diastereomers, according to the  $^{31}\text{P}$  NMR spectrum.  $^1\text{H}$  NMR ( $\text{CDCl}_3$ )  $\delta$  9.04 (s, 1H), 7.83, 7.78 (each m, 4H), 7.41 (s, 1H), 6.50 (m, 1H), 4.98 (d,  $J = 6.3$  Hz, 1H), 4.61 (q,  $J = 5.7$  Hz, 1H), 4.55 (m, 1H), 4.31 (m, 2H), 4.14 (q,  $J = 6.6$  Hz, 2H), 3.78, 3.77 (each d,  $J = 11.2$  Hz, 3H), 3.60 (m, 2H), 3.46 (m, 2H), 2.76 (ddd,  $J = 14.6, 5.8, 1.9$  Hz, 1H), 2.24 (m, 1H), 1.97 (dt,  $J = 11.3, 5.8$  Hz, 2H), 1.91 (s, 3H), 1.45 (d,  $J = 6.3$  Hz, 2H), 1.17 (m, 6H);  $^{13}\text{C}$  NMR ( $\text{CDCl}_3$ )  $\delta$  163.74, 163.68, 150.16, 150.14, 135.46, 135.43, 134.9, 128.7, 123.9, 111.50, 111.47, 102.6, 99.52, 99.47, 87.63, 87.61, 85.2,

81.19, 81.10, 67.1, 64.98, 64.93, 64.87, 61.86, 61.72, 61.68, 61.59, 59.2, 54.62, 54.58, 54.57, 54.52, 47.4, 36.71, 36.68, 35.8, 34.68, 34.64, 34.61, 34.58, 22.9, 19.3, 15.32, 15.28, 15.27, 12.4;  $^{31}\text{P}$  NMR ( $\text{CDCl}_3$ )  $\delta$  0.04, -0.01; IR (film) 2973, 1736, 1690, 1467, 1373, 1277, 1187, 1126, 1033, 877, 703  $\text{cm}^{-1}$ ; HRMS ( $\text{M} + \text{Na}^+$ ) calcd for  $\text{C}_{26}\text{H}_{34}\text{N}_3\text{NaO}_{12}\text{P}$  634.1778, found 634.1752.

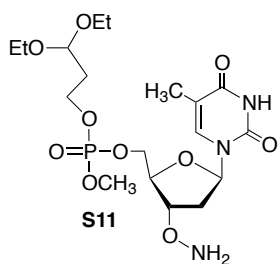

**Preparation of S11.** Phthalimide **S10** (35 mg, 0.06 mmol) in THF (0.5 mL) reacted with hydrazine (0.1 mL, 6 % solution in water) for 5 min at 25 °C. The volatile components were evaporated and the residue was purified by column chromatography using DCM with 5 %

MeOH, yielding 24 mg (89 %) of **S11** as an oil.  $^1\text{H}$  NMR ( $\text{CDCl}_3$ )  $\delta$  9.02 (s, 1H), 7.46 (m, 1H), 6.32 (ddd,  $J = 8.9, 5.6, 3.4$  Hz, 1H), 5.50 (s, 2H), 4.63 (q,  $J = 5.6$  Hz, 1H), 4.37 (d,  $J = 6.3$  Hz, 1H), 4.30 (m, 3H), 4.16 (m, 2H), 3.81, 3.80 (each d,  $J = 11.2$  Hz, 3H), 3.64 (m, 2H), 3.49 (m, 2H), 2.48 (dd,  $J = 14.4, 6.0$  Hz, 1H), 2.00 (m, 3H), 1.93 (t,  $J = 1.2$  Hz, 3H), 1.90 (s, 1H), 1.19 (m, 6H);  $^{13}\text{C}$  NMR ( $\text{CDCl}_3$ )  $\delta$  163.7, 150.42, 150.40, 135.3, 111.49, 111.44, 99.53, 99.50, 84.94, 84.91, 83.53, 83.49, 81.68, 81.60, 67.9, 64.84, 64.79, 64.73, 61.72, 61.67, 61.58, 54.52, 54.49, 54.47, 54.43, 36.80, 36.74, 34.71, 34.64, 15.30, 15.28, 12.40;  $^{31}\text{P}$  NMR ( $\text{CDCl}_3$ )  $\delta$  0.39, 0.28; IR (film) 2972, 1691, 1467, 1274, 1033, 857  $\text{cm}^{-1}$ ; HRMS ( $\text{M} + \text{Na}^+$ ) calcd for  $\text{C}_{18}\text{H}_{32}\text{N}_3\text{NaO}_{10}\text{P}$  504.1723, found 504.1724.

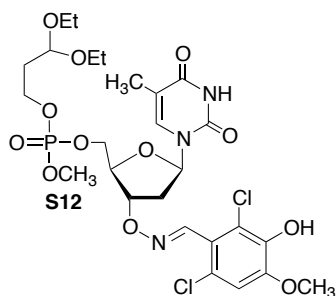

**Preparation of S12.** A solution of **S11** (28 mg, 0.06 mmol), 2,6-dichloro-3-hydroxy-4-methoxybenzaldehyde (17 mg, 0.08 mmol) and AcOH (9 mg, 0.15 mmol) in DMSO (0.5 mL) was incubated at 37°C overnight. The DMSO was evaporated under vacuum and the residue was purified by column chromatography

using DCM with 4 % MeOH, yielding 40 mg (97 %) of **S12** as a foam.  $^1\text{H}$  NMR ( $\text{CDCl}_3$ )  $\delta$  9.26

(s, 1H), 8.31 (s, 1H), 7.51 (m, 1H), 6.85 (s, 1H), 6.51 (m, 1H), 6.48 (m, 1H), 4.97 (d,  $J = 7.0$  Hz, 1H), 4.62 (td,  $J = 5.7, 3.6$  Hz, 1H), 4.42 (m, 1H), 4.33 (m, 2H), 4.17 (q,  $J = 6.7$  Hz, 2H), 3.91 (s, 3H), 3.80 (d,  $J = 11.2$  Hz, 3H), 3.63 (m, 2H), 3.48 (m, 2H), 2.63 (dd,  $J = 14.1, 5.9$  Hz, 1H), 2.16 (m, 1H), 1.99 (q,  $J = 6.4$  Hz, 2H), 1.95 (s, 3H), 1.17 (m, 6H);  $^{13}\text{C}$  NMR ( $\text{CDCl}_3$ )  $\delta$  163.7, 150.61, 150.60, 148.2, 146.8, 141.9, 135.3, 125.4, 120.6, 120.2, 111.69, 111.64, 111.3, 99.55, 99.52, 85.00, 84.99, 82.6, 82.27, 82.21, 64.89, 64.84, 64.78, 61.75, 61.73, 61.61, 56.6, 54.57, 54.53, 54.51, 54.47, 37.46, 37.40, 34.71, 34.69, 34.65, 34.63, 15.3, 12.4;  $^{31}\text{P}$  NMR ( $\text{CDCl}_3$ )  $\delta$  0.30, 0.17; IR (film) 2973, 1690, 1492, 1440, 1274, 1032, 860  $\text{cm}^{-1}$ ; HRMS ( $\text{M} + \text{Na}^+$ ) calcd for  $\text{C}_{26}\text{H}_{36}\text{Cl}_2\text{N}_3\text{NaO}_{12}\text{P}$  706.1311, found 706.1289.

**Preparation of 16.** A solution of **S12** (40 mg, 0.06 mmol)

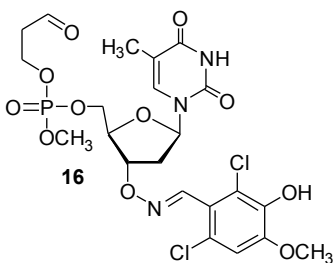

was refluxed in acetone (1 mL) in presence of pyridinium *p*-toluenesulfonate (10 mg, 0.04 mmol) and water (0.05 mL) for 5 h. TLC analysis shows insignificant amount of starting material. The solvents were evaporated and the residue was purified by column

chromatography on silica using DCM with 5 % MeOH, yielding 26 mg (76 %) of **16** as a white solid.  $^1\text{H}$  NMR ( $\text{CD}_3\text{CN}$ )  $\delta$  9.68 (m, 1H), 9.28 (s, 1H), 8.29 (s, 1H), 7.46 (s, 1H), 7.03 (s, 1H), 6.32 (m, 1H), 5.45 (s, 1H), 4.97 (m, 1H), 4.34 (m, 3H), 4.27 (m, 2H), 3.89 (s, 3H), 3.73 (d,  $J = 11.2$  Hz, 3H), 2.79 (td,  $J = 5.9, 1.3$  Hz, 2H), 2.53 (dd,  $J = 14.0, 5.7$  Hz, 1H), 2.28 (dt,  $J = 15.6, 8.4$  Hz, 1H), 1.85 (d,  $J = 1.1$  Hz, 3H);  $^{13}\text{C}$  NMR ( $\text{CD}_3\text{CN}$ )  $\delta$  200.10, 200.08, 163.7, 150.5, 148.9, 146.7, 142.4, 135.55, 135.53, 124.4, 120.5, 119.9, 111.8, 110.7, 84.91, 84.87, 82.46, 82.44, 82.1, 82.0, 67.4, 61.67, 61.66, 61.62, 61.61, 56.4, 54.34, 54.33, 54.31, 54.27, 54.25, 43.55, 43.48, 36.45, 36.44, 11.5;  $^{31}\text{P}$  NMR ( $\text{CD}_3\text{CN}$ )  $\delta$  -0.17, -0.28; IR (film) 2956, 1680, 1487, 1439, 1263, 1032, 841, 731  $\text{cm}^{-1}$ ; HRMS ( $\text{M} + \text{Na}^+$ ) calcd for  $\text{C}_{22}\text{H}_{27}\text{Cl}_2\text{N}_3\text{O}_{11}\text{P}$  610.0760, found 610.0765.

**Synthesis of oxime library.** The library was prepared and stored in 96 well PCR plates. A solution of alkoxyamine **7** in DMSO (1.16 mL, 17.4 mM) was aliquoted into 232 wells (5  $\mu$ L in each, 87 nmol). Solutions of each aldehyde (232) in DMSO (150 mM) were added to each well (0.7  $\mu$ L, 105 nmol), followed by the addition of a solution of acetic acid in DMSO (1  $\mu$ L, 300 nmol). The plates were sealed and incubated at 37 °C for 12 h. DMSO and acetic acid were evaporated in a desiccator under high vacuum for 5 h. The contents of each well were redissolved in 22  $\mu$ L of DMSO to provide a 4 mM solution of oxime and stored at -20 °C.

### **Screening of inhibitor library**

**a. Deprotection.** To screen the library, 5  $\mu$ L of DMSO solutions of **8** were transferred to another set of plates and placed under vacuum to remove DMSO. The contents of each well were redissolved in 5  $\mu$ L of acetonitrile containing 12 mM of N-bromosuccinimide. After 20 min incubation at 0 °C, 1  $\mu$ L of Na<sub>2</sub>S<sub>2</sub>O<sub>3</sub> solution in water (100 mM) and additional 4  $\mu$ L of acetonitrile were added.

**b. Pol  $\beta$  inhibition.** A solution of Pol  $\beta$  (10 nM) in 50 mM HEPES buffer pH = 7.5, 5 mM MgCl<sub>2</sub>, 0.2 mM EDTA, 50 mM KCl and 0.01 % Tween 20, was added to a 96 well format microtiter plate (360  $\mu$ L in each well). It is worth noting that the well should be full in order to get accurate fluorescence data (~380  $\mu$ L). The solutions of inhibitors in acetonitrile produced above (10  $\mu$ L) were transferred to the plates containing Pol  $\beta$  and incubated for 20 min (final concentration of the inhibitor was ~50  $\mu$ M). To determine the polymerase activity in the presence of each inhibitor, a solution of **13** (3.8  $\mu$ L, 5  $\mu$ M) and dTTP (3.8  $\mu$ L, 10 mM) were also added (to make final [**13**] = 50 nM and 100  $\mu$ M of dTTP). The plates were immediately placed in the microtiter plate reader and the measurements were recorded.

**Inhibition of Pol  $\beta$  studied by fluorescence as a function of concentration of specific inhibitors.** Solution of Pol  $\beta$  (360  $\mu$ L, 10 nM) in 50 mM HEPES buffer pH = 7.5, 5 mM MgCl<sub>2</sub>, 0.2 mM EDTA, 50 mM KCl and 0.01 % Tween 20, was added to the wells of a 96 well format microtiter plate. It is worth noting that the well should be full in order to get accurate fluorescence data (~ 380  $\mu$ L). The solutions of inhibitors (40x) in acetonitrile obtained after pentenyl deprotection (10  $\mu$ L) were transferred to the wells containing Pol  $\beta$  and incubated for 20 min. To determine the polymerase activity of enzyme in the presence of each inhibitor, solutions of ternary complex **13** (3.8  $\mu$ L, 5  $\mu$ M) and dTTP (3.8  $\mu$ L, 10 mM) were also added (to make final 50 nM of **13** and 100  $\mu$ M of dTTP). The plates were placed immediately in the microtiter plate reader Cary Eclipse Varian and the measurements started.

**Time dependent inhibition of Pol  $\beta$  via fluorescence spectroscopy.** Pol  $\beta$  (360  $\mu$ L, 10 nM) in 50 mM HEPES buffer pH = 7.5, 5 mM MgCl<sub>2</sub>, 0.2 mM EDTA, 50 mM KCl and 0.01 % Tween 20, was added to 5 wells of a 96 well format microtiter plate. The inhibitor solution (40 x, 10  $\mu$ L) was added to the first well and preincubated for 20 min. At this time, the same portion of inhibitor was added to the second well. Equal amounts of inhibitor were added subsequent wells after an additional 20, 35, and 40 min. Once the inhibitor was added to the fifth well, solutions of ternary complex **13** (3.8  $\mu$ L, 5  $\mu$ M) and dTTP (3.8  $\mu$ L, 10 mM) were also added and the fluorescence measurement was started immediately. This procedure yielded the activity of Pol  $\beta$  (10 nM) after different preincubation times (0, 5, 20, 40, 60 min) with the inhibitor.

**Time dependent inactivation of Pol  $\beta$  by **1a** (**3a**) via gel electrophoresis.** A solution (CH<sub>3</sub>CN) of **1a** or **3a** (10  $\mu$ L) was added to Pol  $\beta$  (400  $\mu$ L, 5 nM) in 50 mM HEPES buffer pH = 7.5, 5 mM MgCl<sub>2</sub>, 0.2 mM EDTA, 50 mM KCl and 0.01 % Tween 20. The final inhibitor concentration varied between 5 and 30  $\mu$ M. At specific times (0-40 min), which represent the

preincubation periods, aliquots (25  $\mu\text{L}$ ) were mixed with  $3'^{32}\text{P}$ -**15** (1  $\mu\text{L}$ , 5  $\mu\text{M}$ ). Aliquots (4  $\mu\text{L}$ ) of the reactions were removed (5, 10, 15, 20, 30 min) and unreacted dRP was stabilized by reacting with  $\text{NaBH}_4$  (1  $\mu\text{L}$ , 0.5 M). The aliquots containing reducing agent were kept on ice for 1 h before mixing with loading buffer (5  $\mu\text{L}$ ) and analyzing by 20 % denaturing PAGE. The preincubation times for each inhibitor concentration varied: 5  $\mu\text{M}$  – 0, 10, 20, 30, 40 min; 10, 15  $\mu\text{M}$  – 0, 5, 10, 15, 20 min; 20  $\mu\text{M}$  – 0, 1, 3, 5, 10 min; 30  $\mu\text{M}$  – 0, 1, 2, 3, 5 min.

**Dialysis of Pol  $\beta$  – inhibitor **1a** (**3a**) reaction.** Pol  $\beta$  (500 nM) was preincubated with the inhibitor **1a** or **3a** (50  $\mu\text{M}$ ) for 30 min in a solution containing 50 mM HEPES buffer pH = 7.5, 5 mM  $\text{MgCl}_2$ , 0.2 mM EDTA, 50 mM KCl, 0.01 % Tween 20 and 10 % glycerol. An aliquot (5  $\mu\text{L}$ ) was diluted to 500  $\mu\text{L}$  and placed in a dialysis cassette. A similar dialysis was set up using Pol  $\beta$  that was not reacted with **3a**. The experiment was carried out in triplicate. Dialysis was carried out in the reaction buffer. The remaining lyase activity of the enzyme was measured on aliquots (25  $\mu\text{L}$ , 0, 1, 2, 3 days) using  $3'^{32}\text{P}$ -**15** (200 nM). Aliquots (4  $\mu\text{L}$ , 5, 10, 15, 20, 30 min) from the reactions were stabilized with  $\text{NaBH}_4$  solution (1  $\mu\text{L}$ , 0.5 M). The aliquots were kept on ice for 1 h before mixing with loading buffer (5  $\mu\text{L}$ ) and analyzing by 20 % denaturing PAGE.

**IC<sub>50</sub> value for inhibitor **1a** and **3a**.** Pol  $\beta$  (500 nM) was preincubated with inhibitor **3a** (0, 2.5, 5, 7.5, 10, 20, 30, 40, 50, 70, 100  $\mu\text{M}$ ) for 30 min in a solution containing 50 mM HEPES buffer pH = 7.5, 5 mM  $\text{MgCl}_2$ , 0.2 mM EDTA, 50 mM KCl and 0.01 % Tween 20. Aliquots (1  $\mu\text{L}$ ) were diluted to 100  $\mu\text{L}$ . The remaining lyase activity of the enzyme was determined using  $3'^{32}\text{P}$ -**15** (200 nM). Aliquots (4  $\mu\text{L}$ ) were removed at indicated time points (5, 10, 15, 20, 30 min) and stabilized with  $\text{NaBH}_4$  solution (1  $\mu\text{L}$ , 0.5 M). The aliquots were kept on ice for 1 h before mixing with loading buffer (5  $\mu\text{L}$ ) and separating by 20 % denaturing PAGE. The IC<sub>50</sub> for **1a** was determined in the same manner except the inhibitor concentration range was between 0

and 200  $\mu\text{M}$ . The relative activities were fit to the following sigmoidal equation:  $\text{Relative Activity} = A_2 + [(A_1 - A_2) / (1 + (x/x_0)^p)]$ , where  $x$  = concentration of inhibitor,  $A_2$  = minimum enzyme activity,  $A_1$  = maximum enzyme activity,  $x_0 = \text{IC}_{50}$ , and  $p$  – Hill slope, which characterizes the slope of the curve at its midpoint. The data were fit iteratively using Origin 6.1.

**Specificity of the inhibitor 3a for Pol  $\beta$  against Klenow (exo<sup>-</sup>).** A 96 well format microtiter plate was used to probe the polymerase activity of Pol  $\beta$  and Klenow (exo<sup>-</sup>) in the presence of inhibitor **3a**. The plate was charged with the solution containing **13** (50 nM), dTTP (5, 25, 50, 75  $\mu\text{M}$ ) and **3a** (0, 25, 50  $\mu\text{M}$ ) in 50 mM HEPES buffer pH = 7.5, 5 mM  $\text{MgCl}_2$ , 0.2 mM EDTA, 50 mM KCl and 0.01 % Tween 20. The volume of the solution in each well is  $\sim 400 \mu\text{L}$ . Pol  $\beta$  (final concentration, 10 nM) or Klenow exo<sup>-</sup> (final concentration 5 nM) is added and the measurement of the fluorescence is started immediately.

**Cell Culture and Clonogenic Survival.** DU 145 cells were obtained from the American Type Culture Collection (ATCC, HTB-81, Manassas, VA) and maintained in RPMI 1640 culture medium (Sigma-Aldrich R8758, St. Louis, MO), supplemented with 10% fetal bovine serum (Sigma-Aldrich F6178, St. Louis, MO). SV40-transformed mouse embryonic fibroblasts (MEFs) were obtained from Sam Wilson, NIEHS. MEFs were maintained in high glucose DMEM culture medium supplemented with 10% FBS and glutamax. Cultures were grown at 37°C in a humidified atmosphere of 5% carbon dioxide (DU145 cells) or 10% carbon dioxide (MEFs) without any antibiotics and subcultured when they reached confluence. For clonogenic survival analysis the appropriate number of cells were grown in standard 6-well tissue culture dishes in the growth media (2 mL per well). After 2 days the cells were treated with Pol  $\beta$  inhibitors (**3a** or **18**) by addition of sterile stock solution in water directly to the growth media to the desired final concentrations. Cells were treated similarly with methyl methanesulfonate



(MMS, Sigma-Aldrich, St. Louis, MO). For combined treatments **18** was added to the cells first followed by MMS. The compounds remained present throughout the entire assay. Two weeks after the treatment the cells were fixed and stained with 0.2% solution of crystal violet in 50% methanol. Colonies with  $\geq 50$  cells were counted. All treatments were carried out in triplicate.

**Preparation of cell lysates.** Cells were harvested by mild trypsinization. The cells were then washed three times with phosphate buffered saline. Cell pellets were suspended in 1 X Passive Lysis Buffer (PBL, Promega Corporation, E1941, Madison, WI) at concentration of  $1 \times 10^7$  cells per mL and frozen in aliquots at  $-80^\circ\text{C}$ . Protein concentrations were determined by Bio-Rad protein assay dye (Bio-Rad, 500-0006, Hercules, CA) according to the manufacturer's protocol and using bovine serum albumin as a standard.

**Assessing the lyase activity of DU145 cell extracts (lysates) in the presence of an inhibitor.** DU145 cell extract (2.94 mg / mL of protein,  $10 \times 10^6$  cells / mL) was diluted 1:6 with HM buffer (3.5  $\mu\text{L}$  diluted with 20.5  $\mu\text{L}$  of buffer). Solutions of **3a** or **18** (all 25 X in water, 1  $\mu\text{L}$ , 0, 10, 20, 50, 100  $\mu\text{M}$ ) were preincubated with the diluted cell extract for 1 h. The dRP substrate,  $3'^{32}\text{P-15}$  (1  $\mu\text{L}$ , 25 X) was added to obtain 200 nM desired concentration and aliquots (4  $\mu\text{L}$ ) were collected at specific time points and stabilized with  $\text{NaBH}_4$  (1  $\mu\text{L}$ , 1 M). The aliquots were kept on ice for 1 h before mixing with loading buffer (5  $\mu\text{L}$ ). The samples were analyzed by 20 % denaturing PAGE and quantified using a phosphorimager.

**Assessing the effect of 18 on lyase activity of mouse embryonic fibroblast lysates.** Cell lysate (32  $\mu\text{g}$  protein) from the corresponding cell line (obtained from Dr. Sam Wilson, NIEHS) was incubated in HM buffer with or without **18** (50  $\mu\text{M}$ ) for 40 min at  $25^\circ\text{C}$  (10  $\mu\text{L}$  total volume), at which time  $3'^{32}\text{P-15}$  (2  $\mu\text{L}$ , final concentration: 100 nM) was added. Aliquots (4  $\mu\text{L}$ ) were removed at 5, 15, and 25 min and frozen in dry-ice, except for Pol  $\lambda$  wild type

lysates, from which aliquots were removed at 2, 5, and 10 min. When the reactions were complete, NaBH<sub>4</sub> (1 μL, 0.5 M) was added to each aliquot. The aliquots were kept on ice for 1 h before mixing with loading buffer (5 μL). The samples were analyzed by 20 % denaturing PAGE and quantified using a phosphorimager.

**Supporting Information Table 1.** Rate dependence of product formation on presence of inhibitor as a function of cell type.

| Cell Type             | Inhibitor | Rate ( $\times 10^{-1} \% \cdot \text{min}^{-1}$ ) <sup>a</sup> | n <sup>b</sup> |
|-----------------------|-----------|-----------------------------------------------------------------|----------------|
| Pol β wt              | -         | 17.2 ± 5.2                                                      | 6              |
| Pol β wt              | +         | 9.2 ± 2.4                                                       | 4              |
| Pol β -               | -         | 7.0 ± 2.1                                                       | 6              |
| Pol β -               | +         | 5.5 ± 1.5                                                       | 6              |
| Pol λ -               | -         | 15.9 ± 4.4                                                      | 10             |
| Pol λ -               | +         | 9.1 ± 2.3                                                       | 12             |
| Pol β/λ -             | -         | 15.0 ± 4.0                                                      | 12             |
| Pol β/λ -             | +         | 11.0 ± 4.0                                                      | 10             |
| Pol λ wt <sup>c</sup> | -         | 23.7 ± 3.7                                                      | 3              |
| Pol λ wt <sup>c</sup> | +         | 12.4 ± 3.2                                                      | 4              |

<sup>a</sup>Reactions carried out in the presence of 32 μg protein. Aliquots taken at 5, 15, and 25 min. Rates are reported as the average ± std. dev. of n reactions. <sup>b</sup>Number of reactions used to determine average and standard deviation. <sup>c</sup>Aliquots taken at 2, 5, and 10 min.

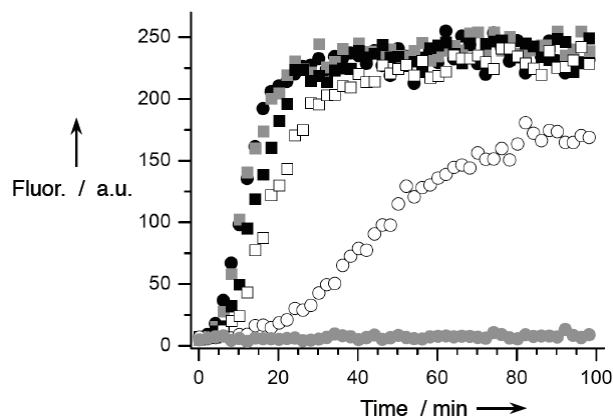

**Supporting Information Figure 1.** Concentration dependence of Pol β strand displacement synthesis inhibition by **2a**. [**2a**] (μM): 0, ●; 1, ■; 5, ■; 10, □; 25, ○; 50, ●

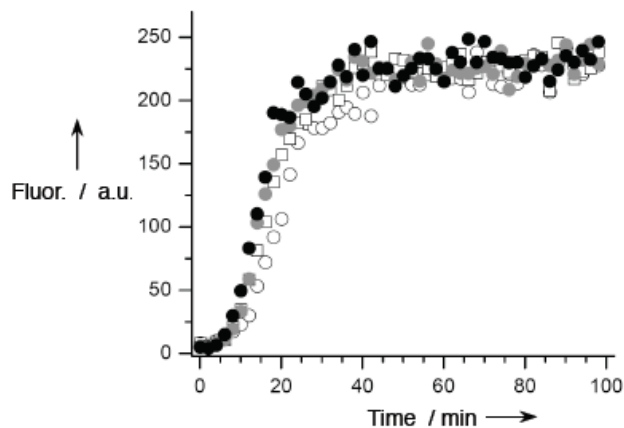

**Supporting Information Figure 2.** Concentration dependence of Pol  $\beta$  strand displacement synthesis inhibition by **16**. [**16**] ( $\mu\text{M}$ ): 0, ●; 25, ●; 50, □; 150, ○

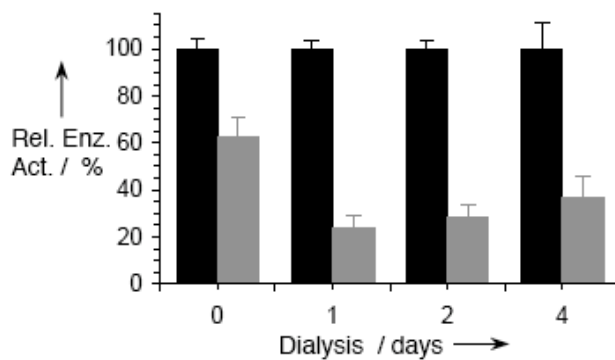

**Supporting Information Figure 3.** Relative Pol  $\beta$  activity with and without **3a** following dialysis. [**3a**] ( $\mu\text{M}$ ): 0, ■; 20, ■

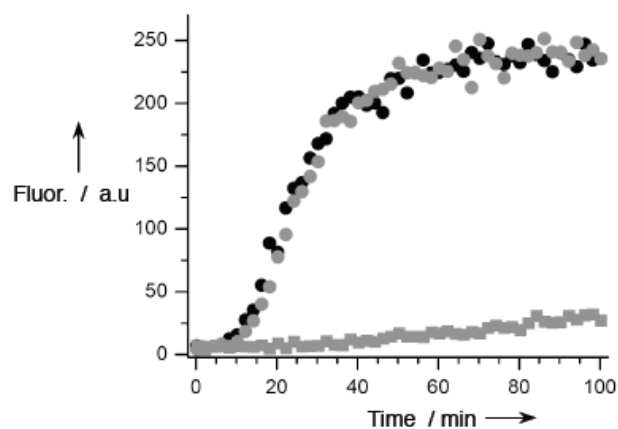

**Supporting Information Figure 4.** Pol  $\beta$  polymerase activity in the absence of inhibitor and the presence of **3a** or its reduced form, **17**. No inhibitor, ●; **17**, 20  $\mu\text{M}$ , ●; **3a**, 20  $\mu\text{M}$ , ■

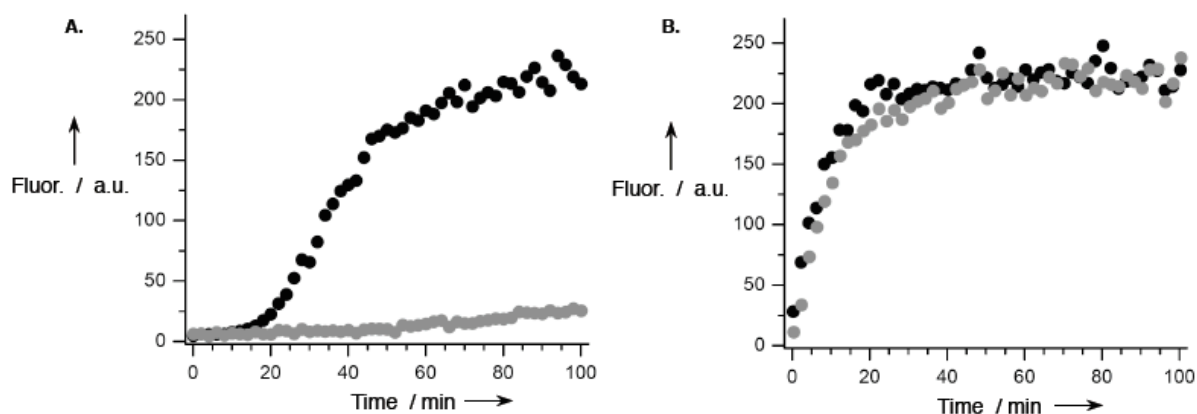

**Supporting Information Figure 5.** Selectivity for Pol  $\beta$  inhibition by **3a**. A) Effect on Pol  $\beta$ . B) Effect on Klenow  $\text{exo}^-$ . [**3a**] ( $\mu\text{M}$ ), 0, ●; 10, ●

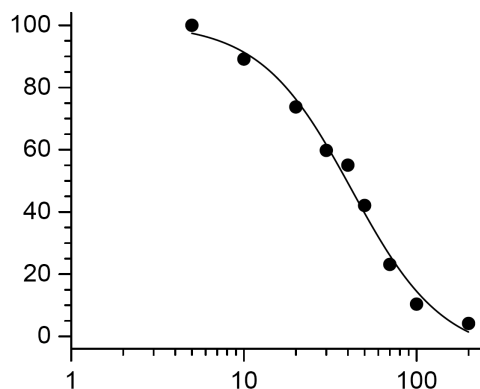

**Supporting Information Figure 6.**  $\text{IC}_{50}$  of Pol  $\beta$  inactivation by **1a** (30 min preincubation).

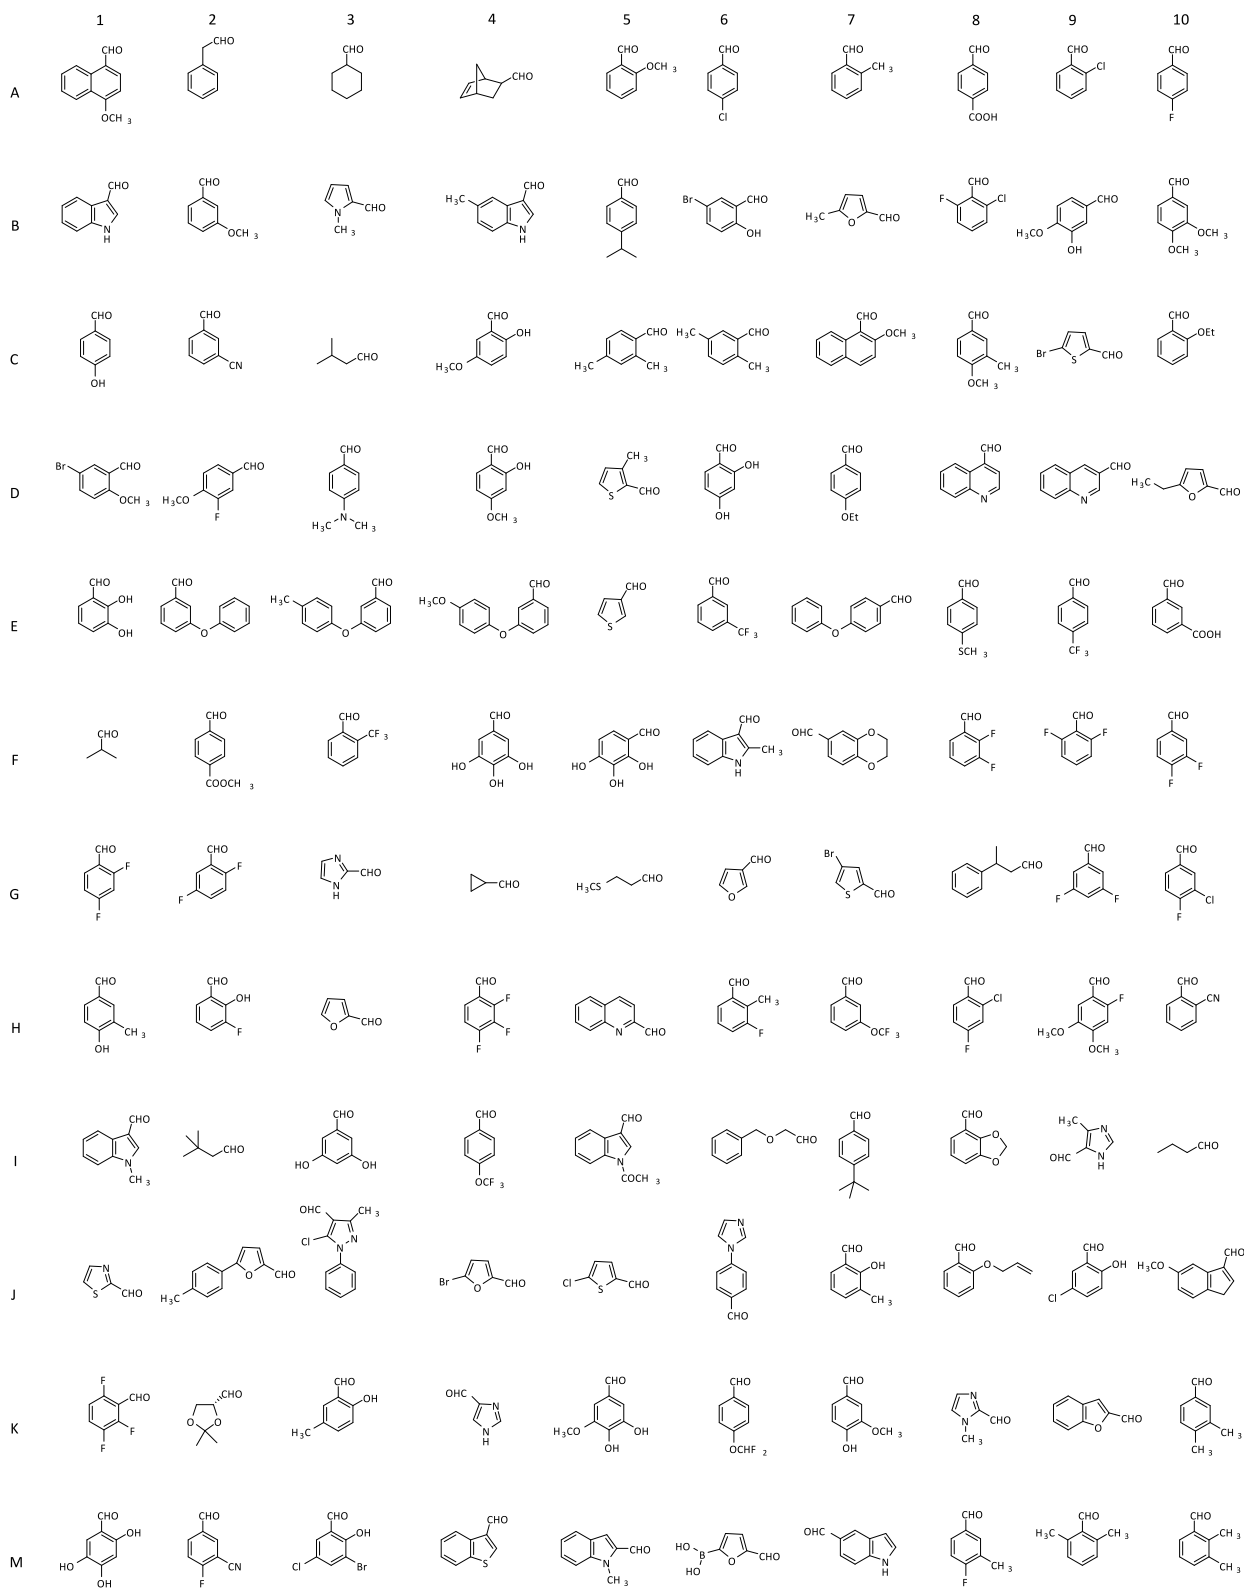

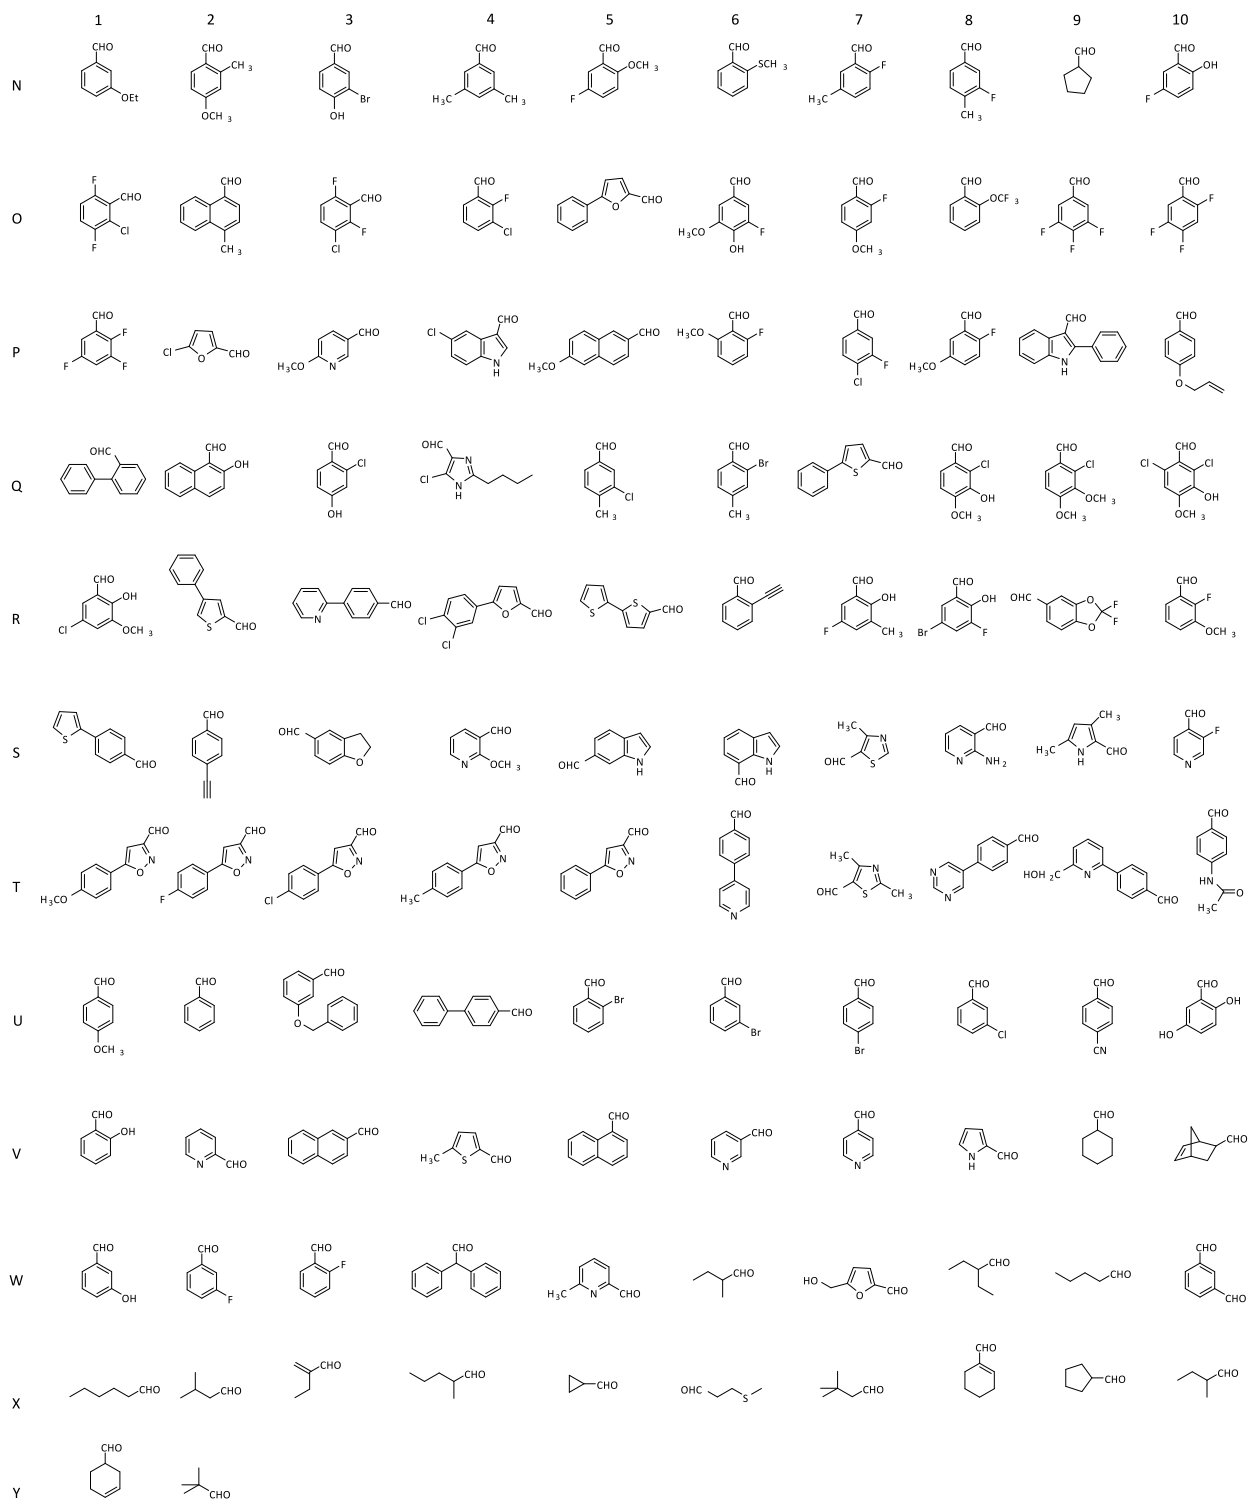

Supporting Information Figure 7. Chart of aldehydes used to prepare oxime library.

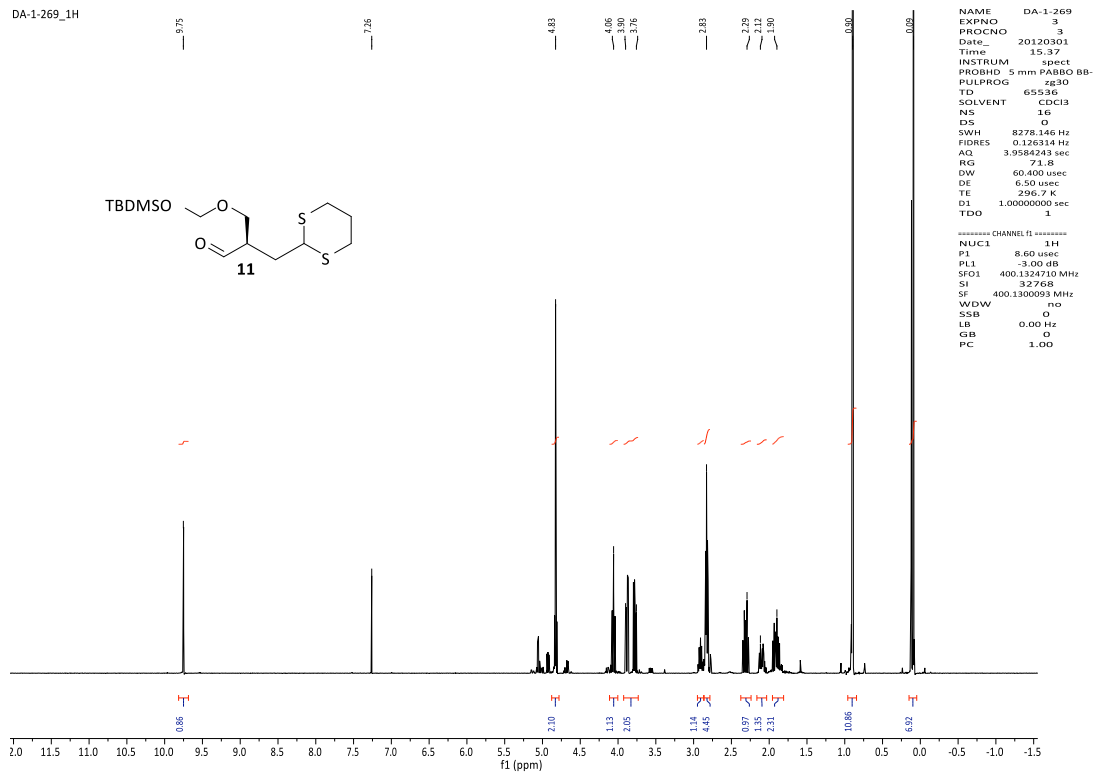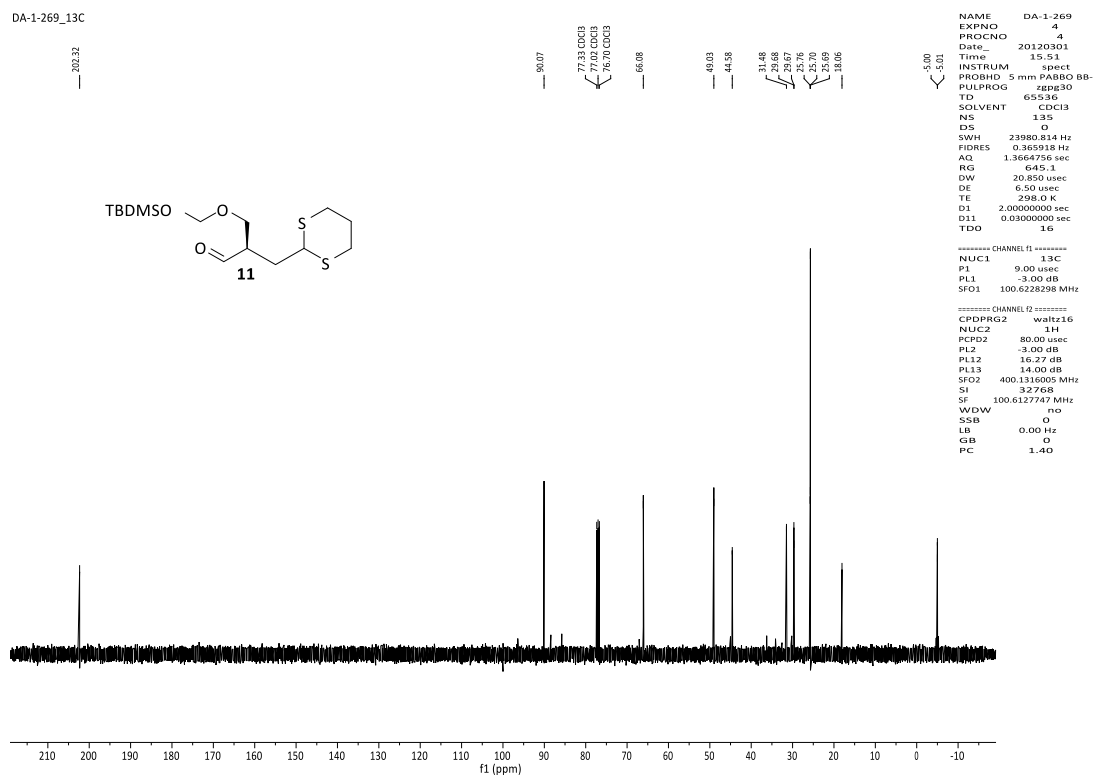

Supporting Information Figure 8. <sup>1</sup>H and <sup>13</sup>C NMR spectra of **11** in CDCl<sub>3</sub>.

DA-1-271\_1\_H

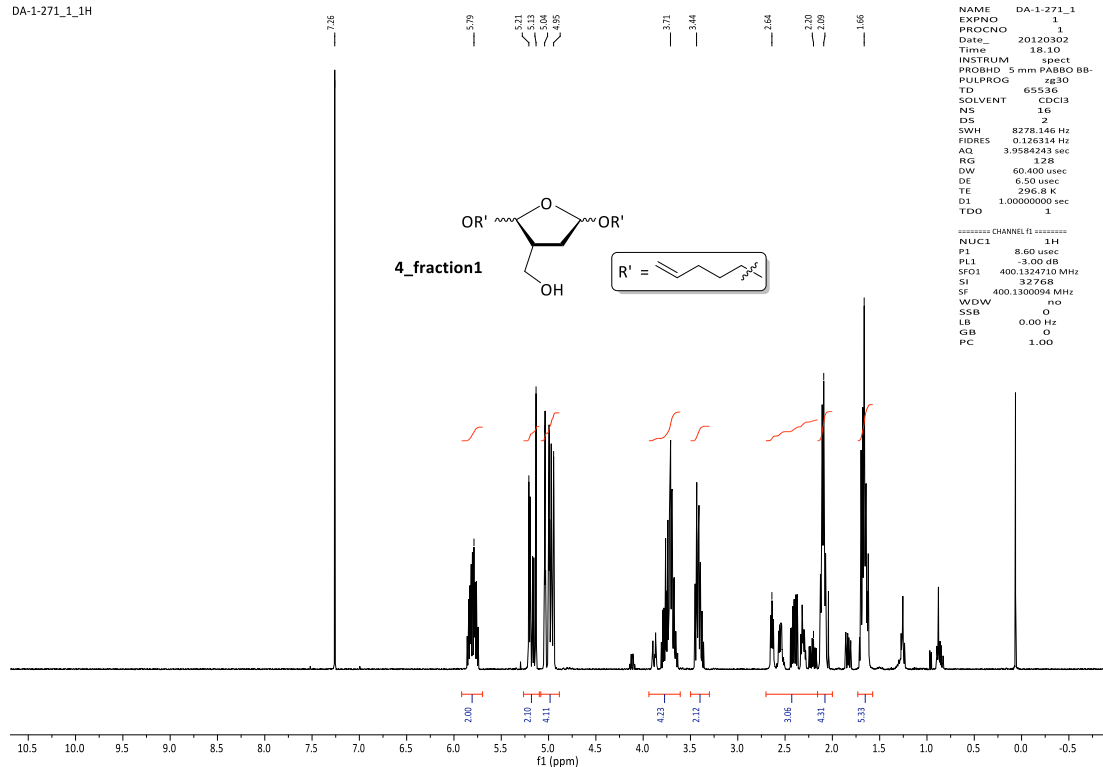

DA-1-271\_1\_13C

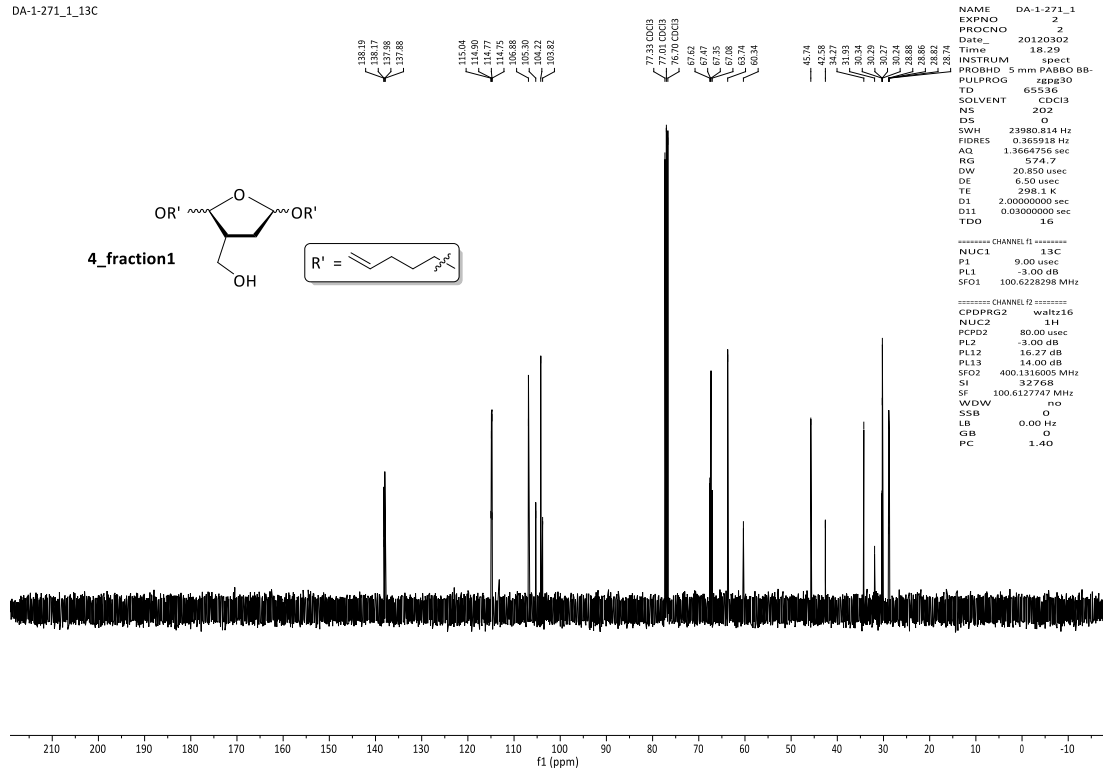

Supporting Information Figure 9. <sup>1</sup>H and <sup>13</sup>C NMR spectra of 4\_fraction1 in CDCl<sub>3</sub>.



DA-1-271\_2\_1H

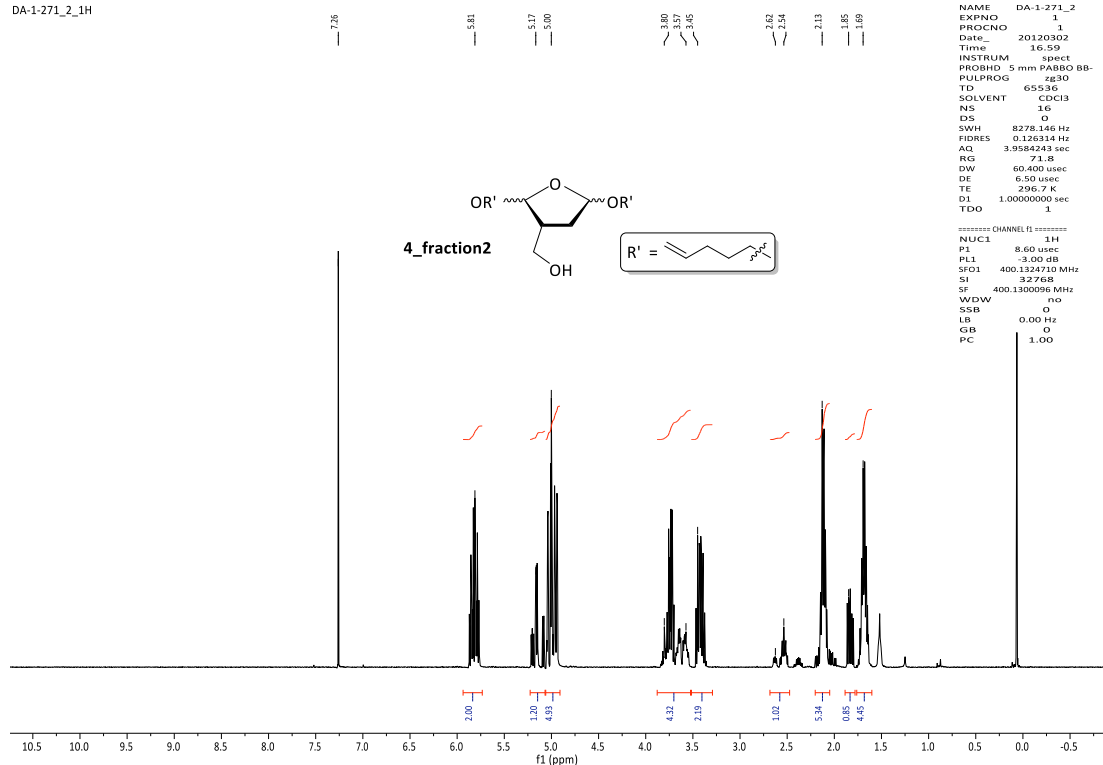

DA-1-271\_2\_13C

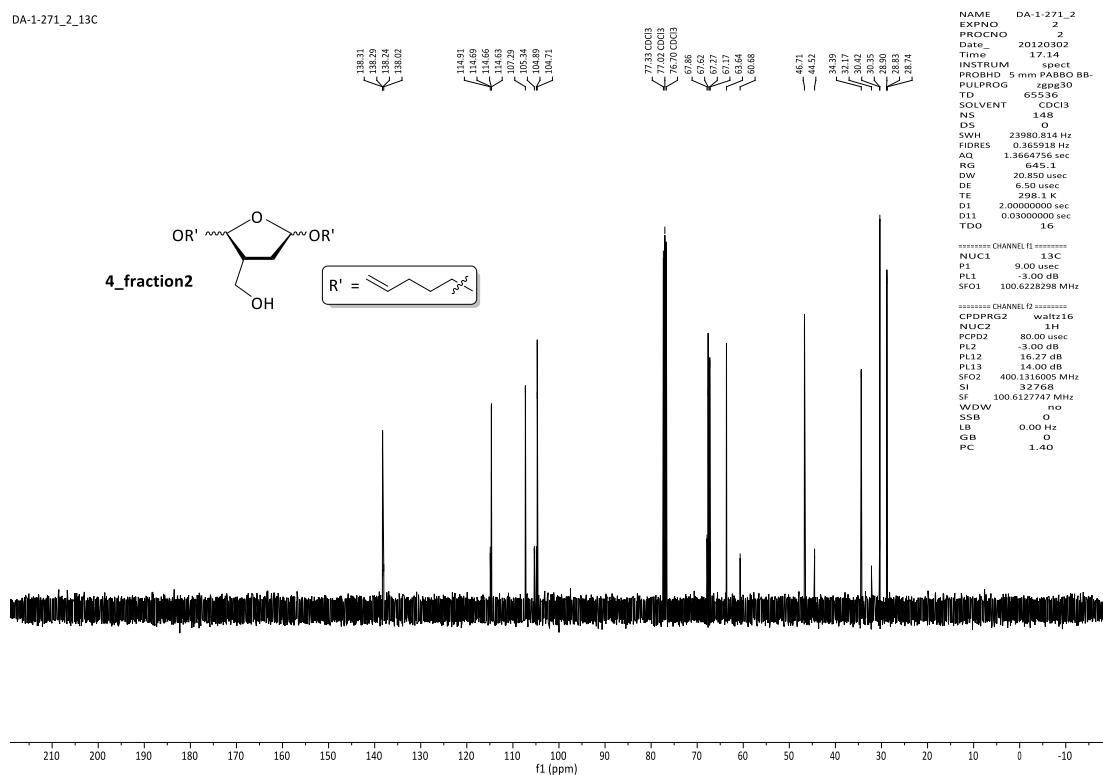

Supporting Information Figure 10. <sup>1</sup>H and <sup>13</sup>C NMR spectra of 4\_fraction2 in CDCl<sub>3</sub>.

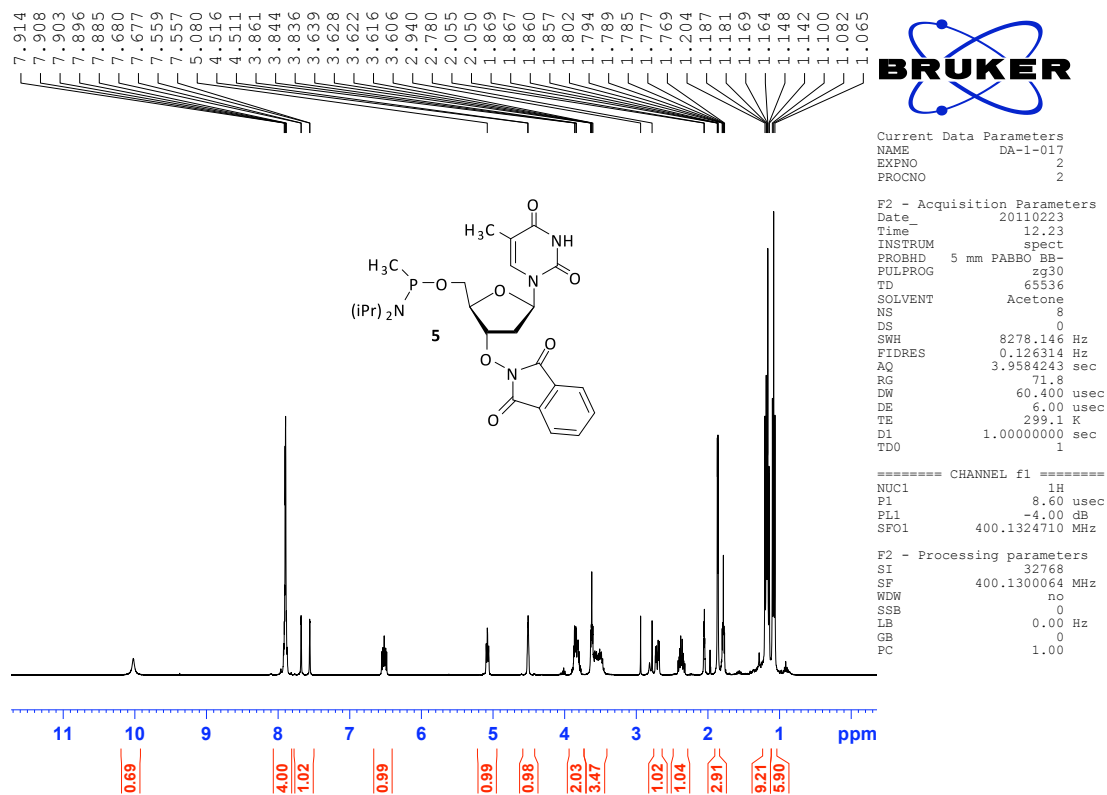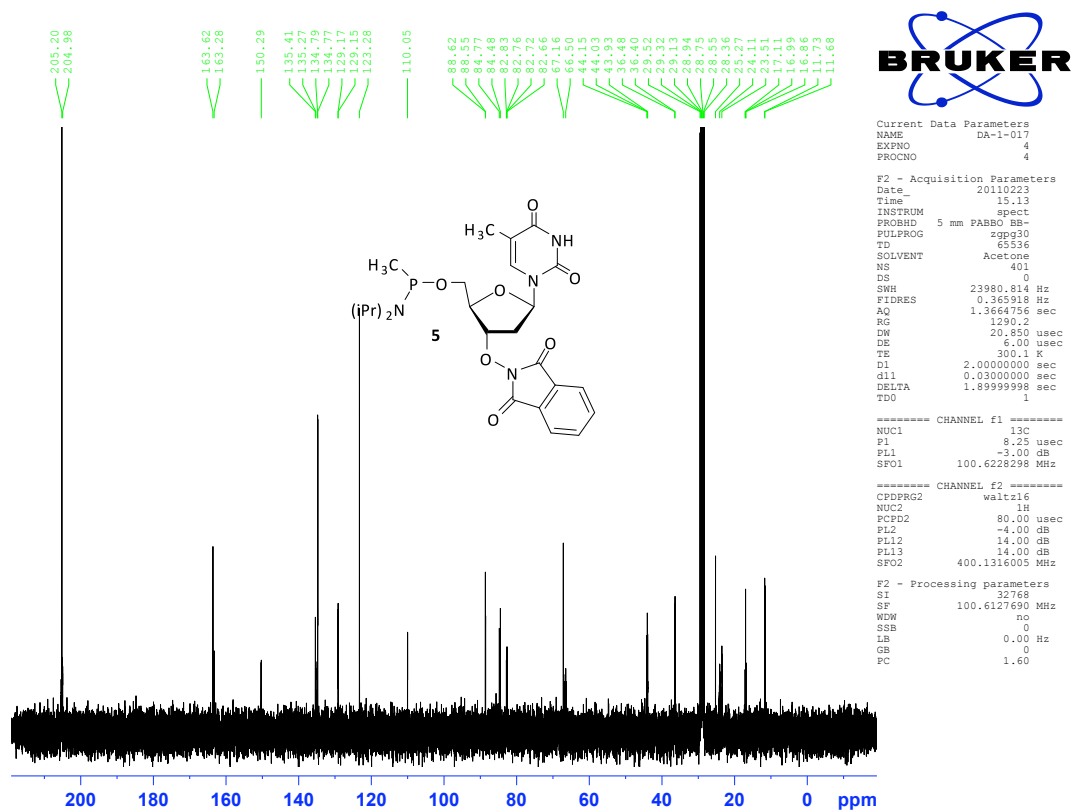

Supporting Information Figure 11. <sup>1</sup>H and <sup>13</sup>C NMR spectra of **5** in acetone-d<sub>6</sub>.

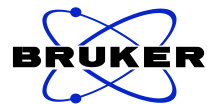

Current Data Parameters  
NAME DA-1-017  
EXPNO 5  
PROCNO 5

F2 - Acquisition Parameters  
Date 20110223  
Time 15.39  
INSTRUM spect  
PROBHD 5 mm PABBO BB-  
PULPROG zgpg30  
TD 65536  
SOLVENT Acetone  
NS 16  
DS 0  
SWH 75187.969 Hz  
FIDRES 1.147277 Hz  
AQ 0.4358644 sec  
RG 20642.5  
DW 6.650 usec  
DE 6.00 usec  
TE 299.5 K  
D1 2.0000000 sec  
d11 0.0300000 sec  
DELTA 1.89999998 sec  
TD0 1

===== CHANNEL f1 =====  
NUC1 31P  
P1 8.20 usec  
PL1 -2.00 dB  
SFO1 161.9674942 MHz

===== CHANNEL f2 =====  
CPDPRG2 waltz16  
NUC2 1H  
PCPD2 80.00 usec  
PL2 -4.00 dB  
PL12 14.00 dB  
PL13 14.00 dB  
SFO2 400.1316005 MHz

F2 - Processing parameters  
SI 32768  
SF 161.9755920 MHz  
WDW no  
SSB 0  
LB 0.00 Hz  
GB 0  
PC 5.00

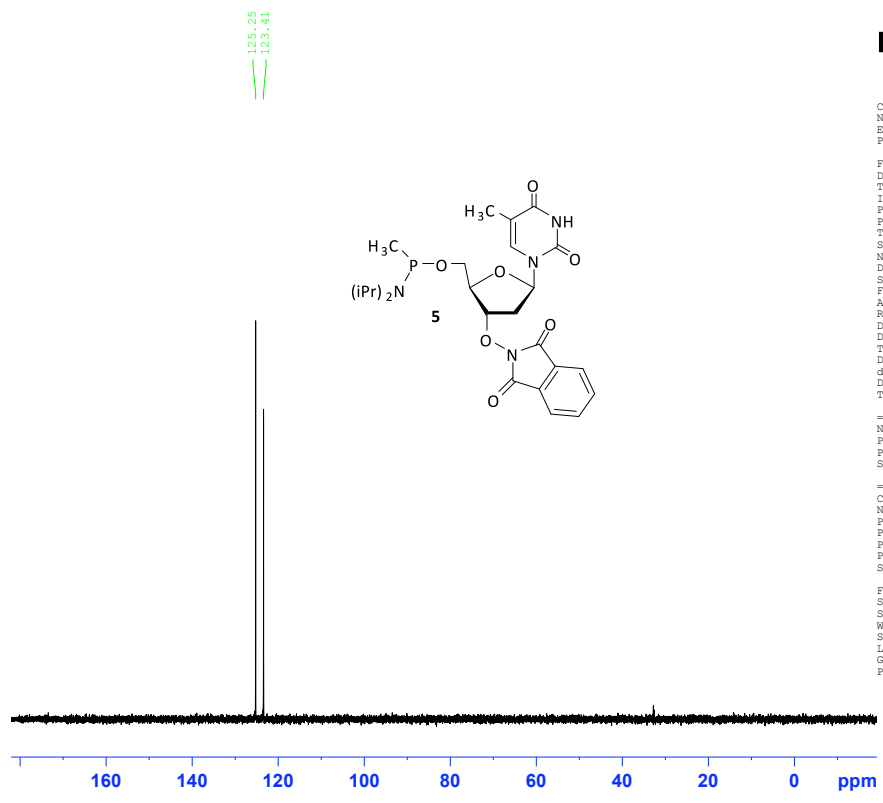

Supporting Information Figure 12. <sup>31</sup>P NMR spectra of **5** in acetone-d<sub>6</sub>.

DA-1-272\_1H

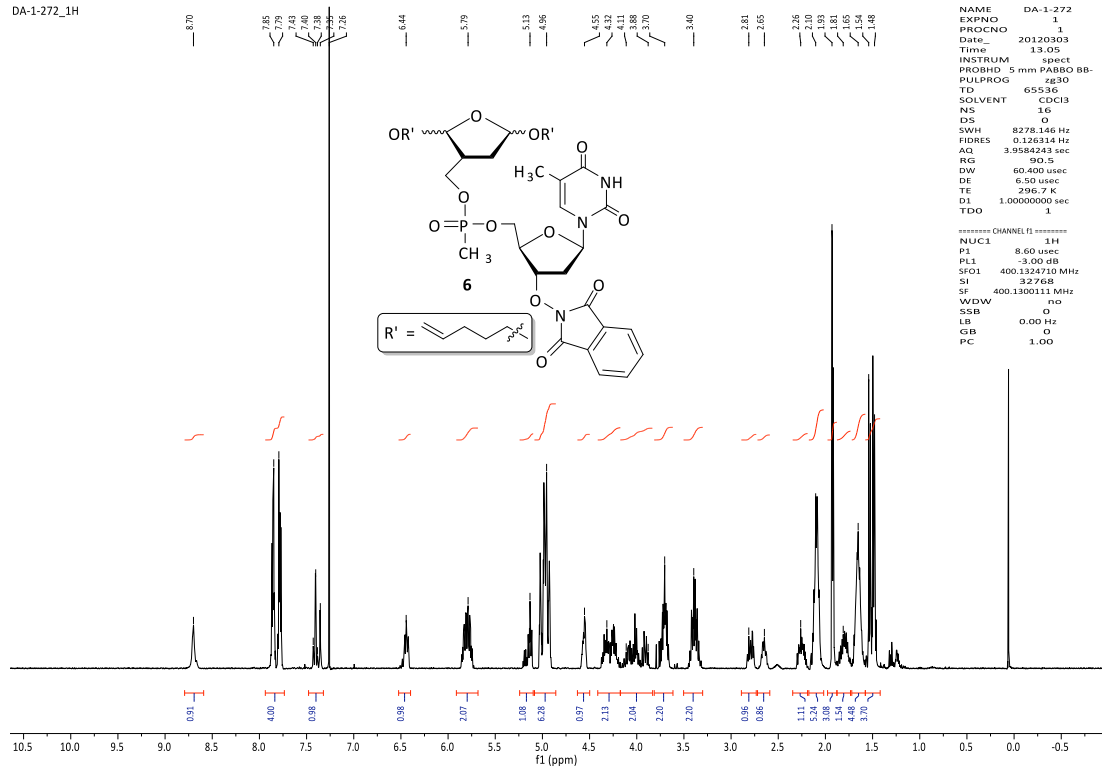

DA-1-272\_13C

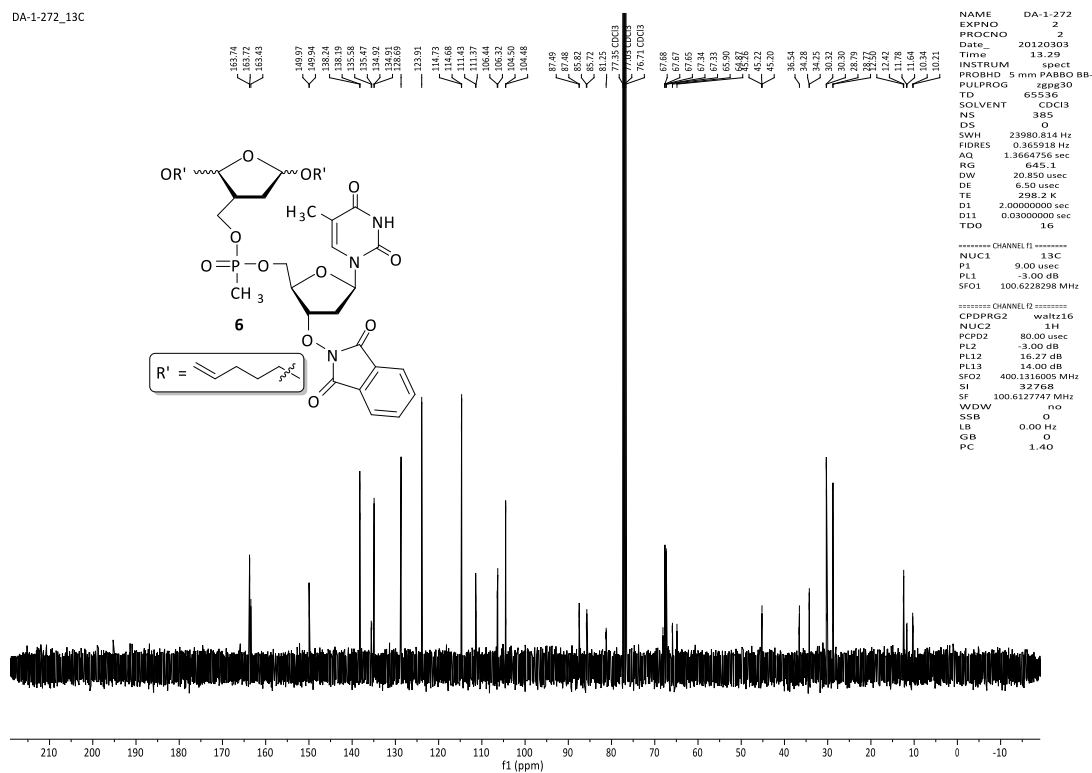Supporting Information Figure 13. <sup>1</sup>H and <sup>13</sup>C NMR spectra of 6 in CDCl<sub>3</sub>.

DA-1-272\_31P

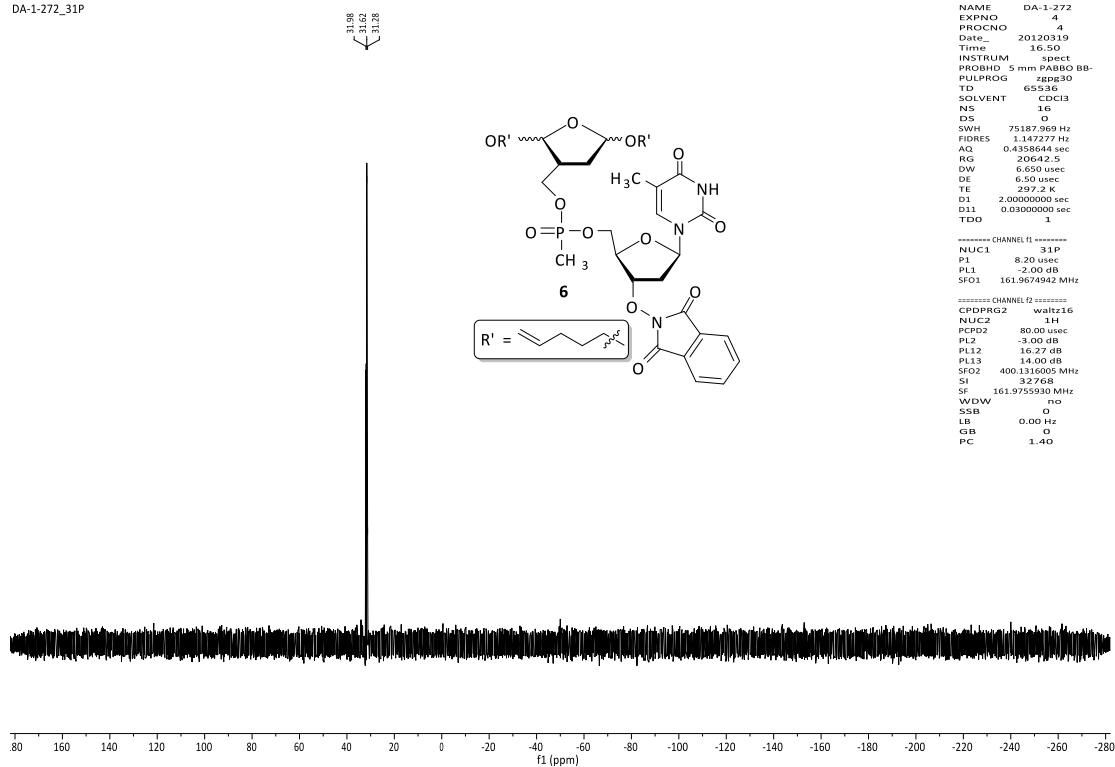

Supporting Information Figure 14. <sup>31</sup>P NMR spectra of **6** in CDCl<sub>3</sub>.

DA-1-274\_1H

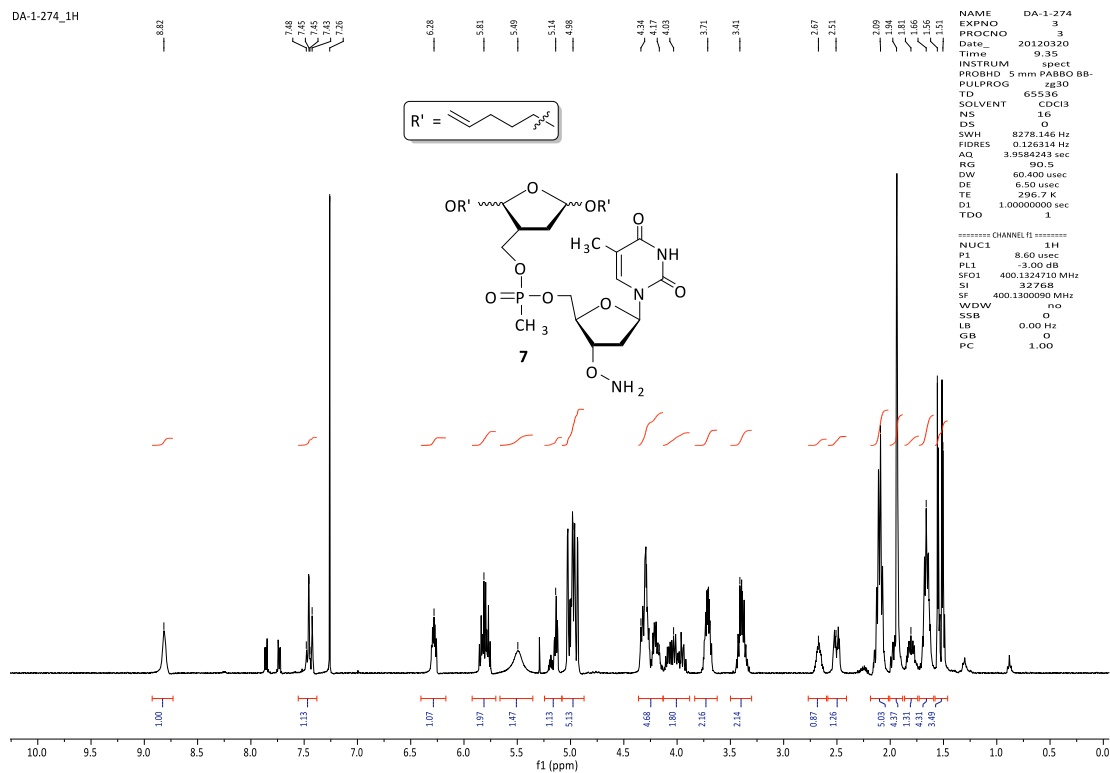

DA-1-274\_13C

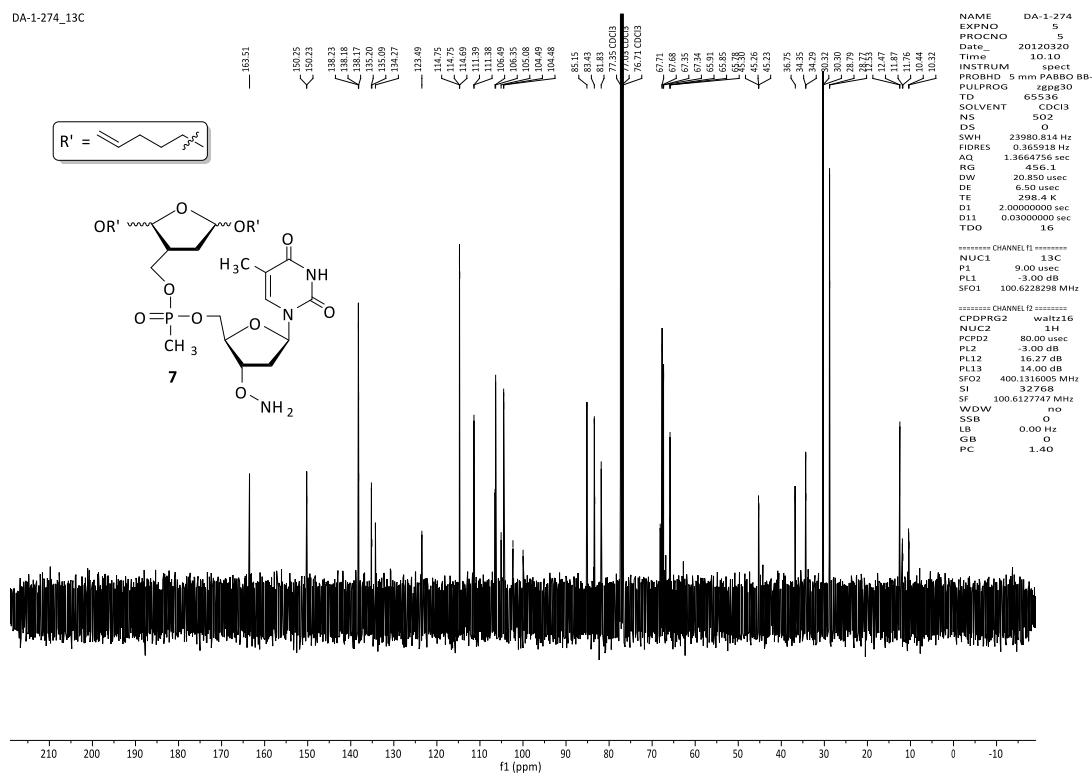Supporting Information Figure 15. <sup>1</sup>H and <sup>13</sup>C NMR spectra of **7** in CDCl<sub>3</sub>.

DA-1-274\_31P

31.99  
31.96  
31.93

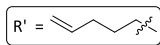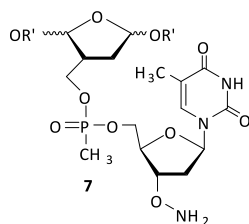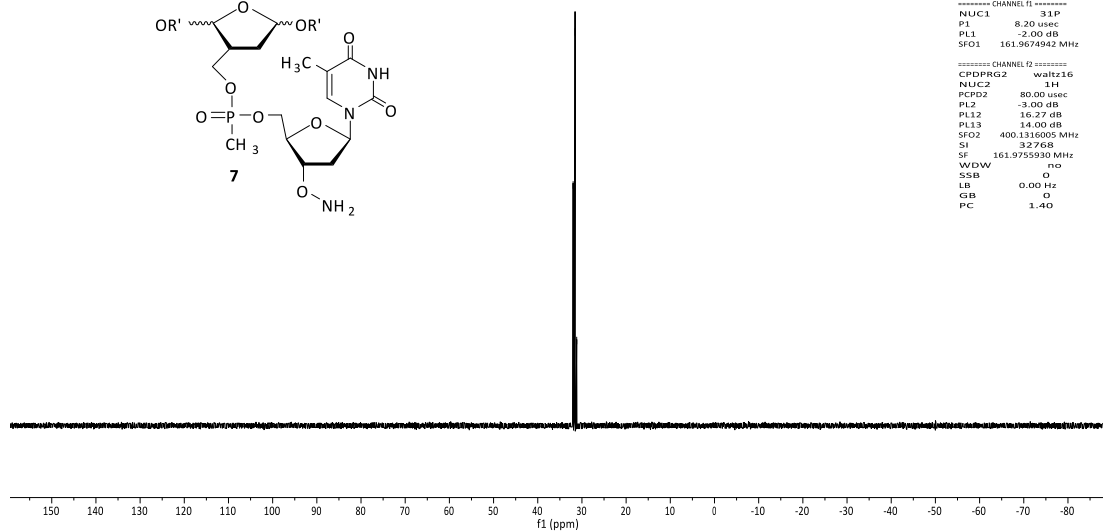

```
NAME DA-1-274
EXPNO 4
PROCNO 4
Date_ 20120320
Time 9.38
INSTRUM spect
PROBHD 5 mm PABBO BB-
PULPROG zgpg30
TD 65536
SOLVENT CDCl3
NS 16
DS 0
SWH 75187.969 Hz
FIDRES 1.147277 Hz
AQ 0.435564 sec
RG 20642.5
DW 6.550 usec
DE 6.50 usec
TE 297.3 K
D1 2.0000000 sec
D11 0.0300000 sec
TDO 1
```

```
===== CHANNEL f1 =====
NUC1 31P
P1 8.20 usec
PL1 -2.00 dB
SFO1 161.9674942 MHz
```

```
===== CHANNEL f2 =====
CPDPRG2 waltz16
NUC2 1H
PCPD2 80.00 usec
PL2 -3.00 dB
PL12 16.27 dB
PL13 14.00 dB
SFO2 400.1316005 MHz
SI 32768
SF 161.9755930 MHz
WDW no
SSB 0
LB 0.00 Hz
GB 0
PC 1.40
```

Supporting Information Figure 16. <sup>31</sup>P NMR spectrum of **7** in CDCl<sub>3</sub>.

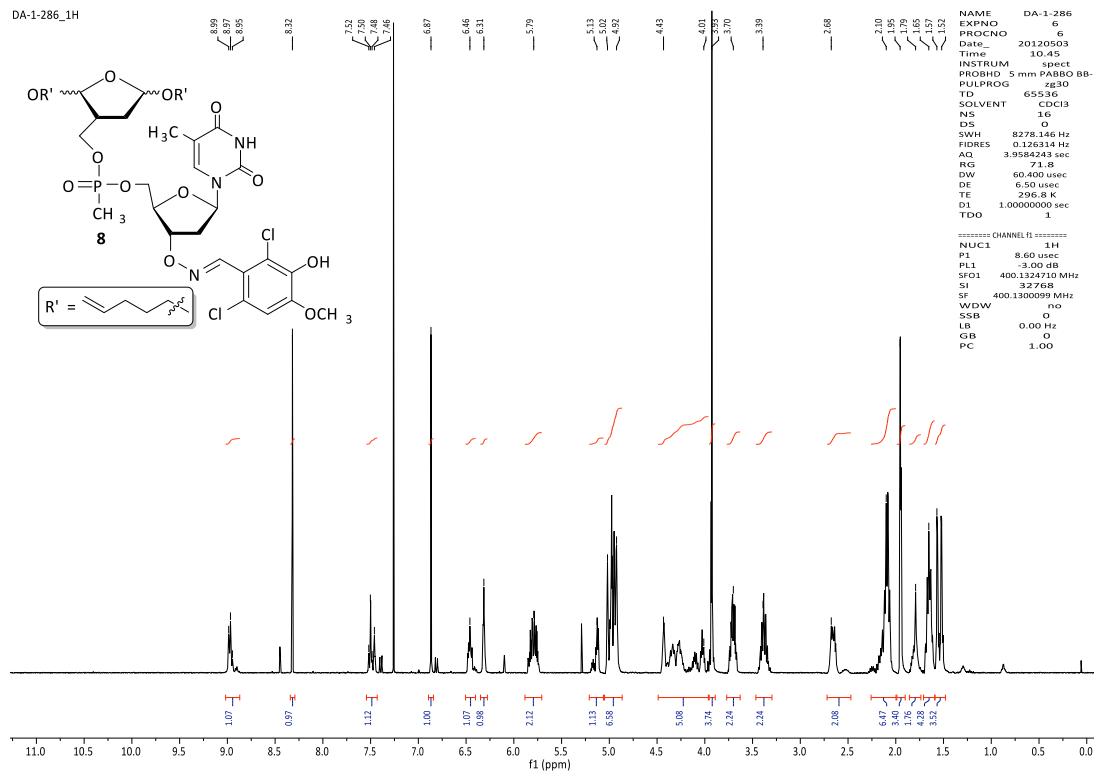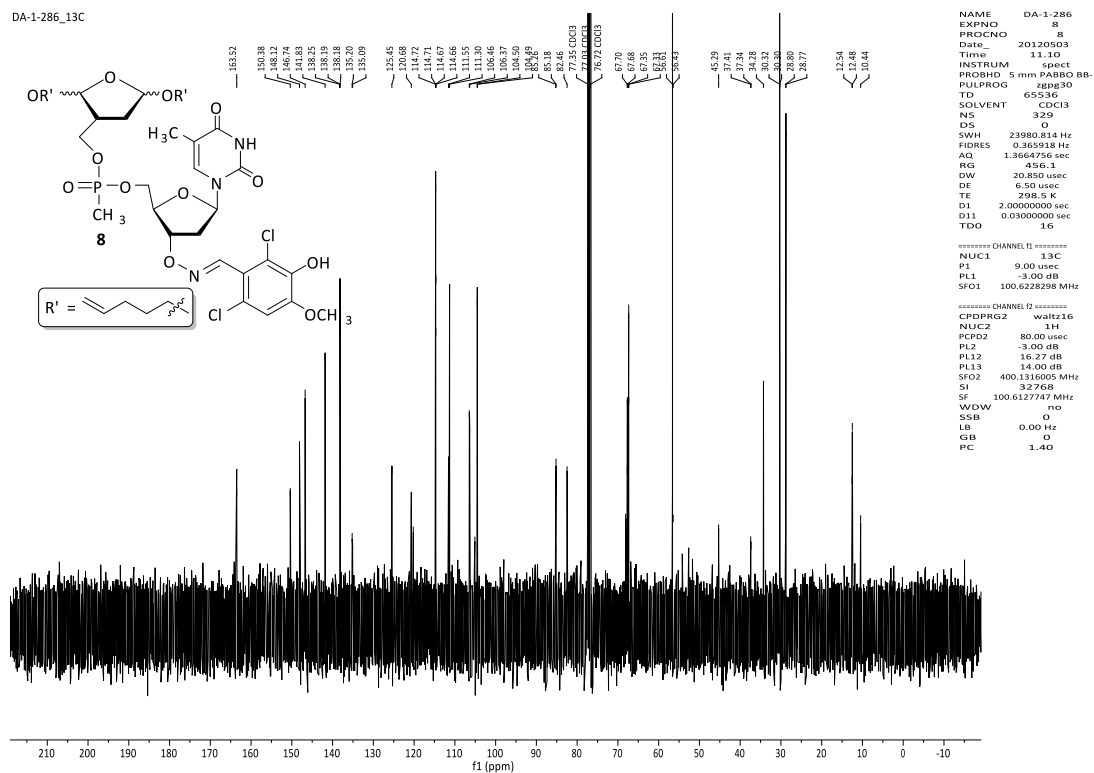

Supporting Information Figure 17.  $^1\text{H}$  and  $^{13}\text{C}$  NMR spectra of **8** in  $\text{CDCl}_3$ .



DA-1-286\_31P

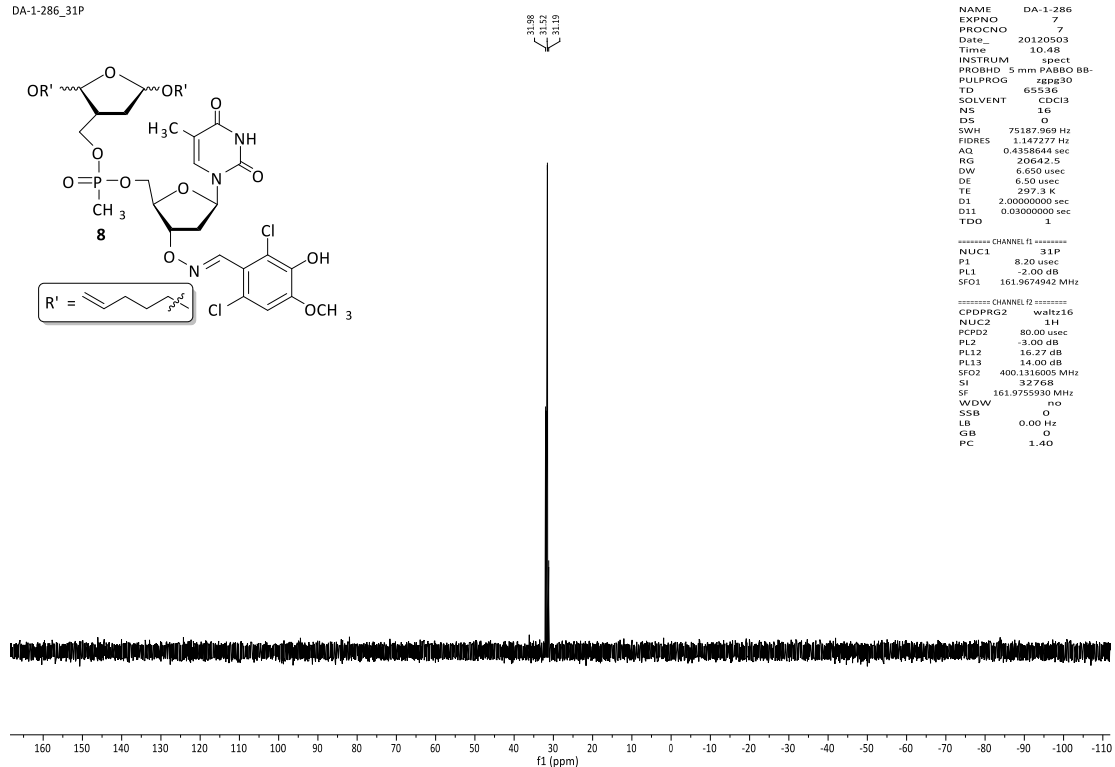

Supporting Information Figure 18. <sup>31</sup>P NMR spectrum of **8** in CDCl<sub>3</sub>.

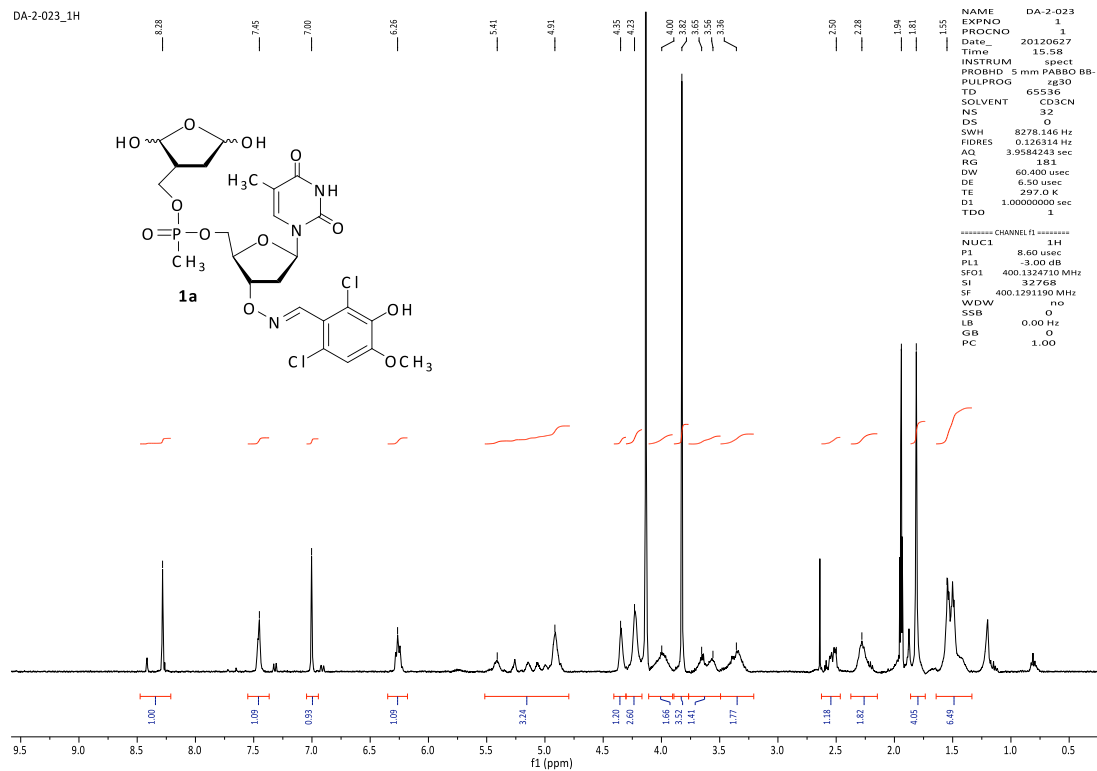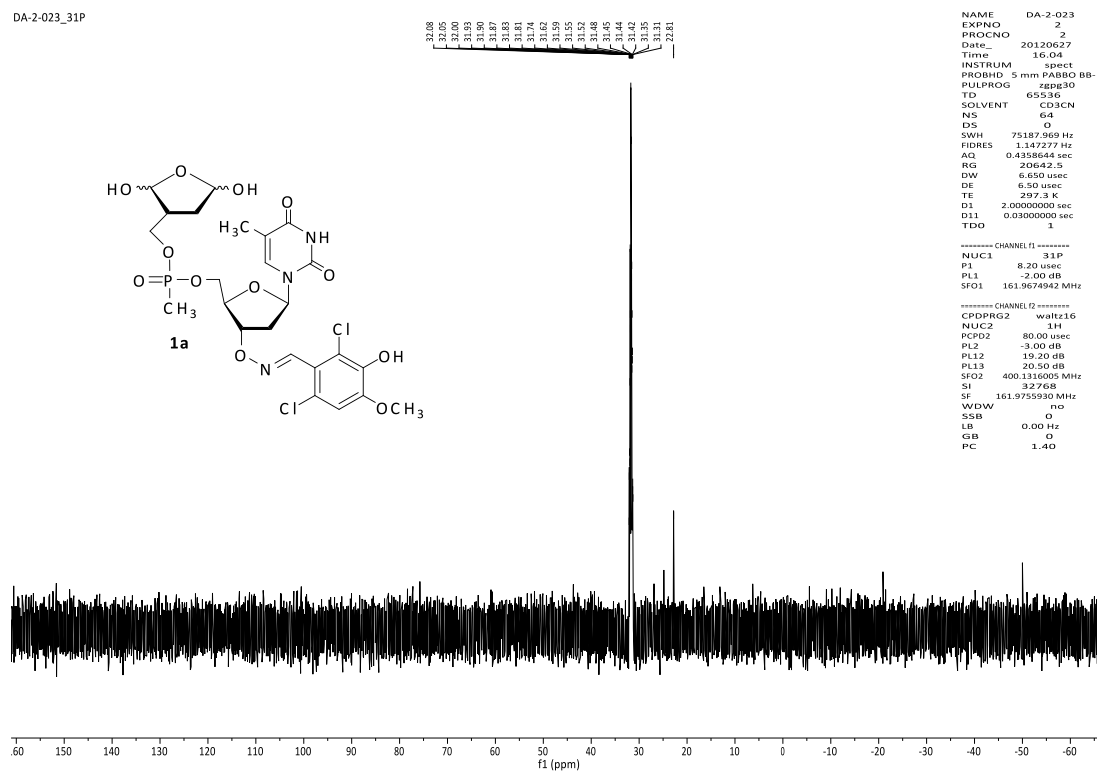

Supporting Information Figure 19.  $^1\text{H}$  and  $^{31}\text{P}$  NMR spectra of **1a** in acetonitrile- $\text{d}_3$ .

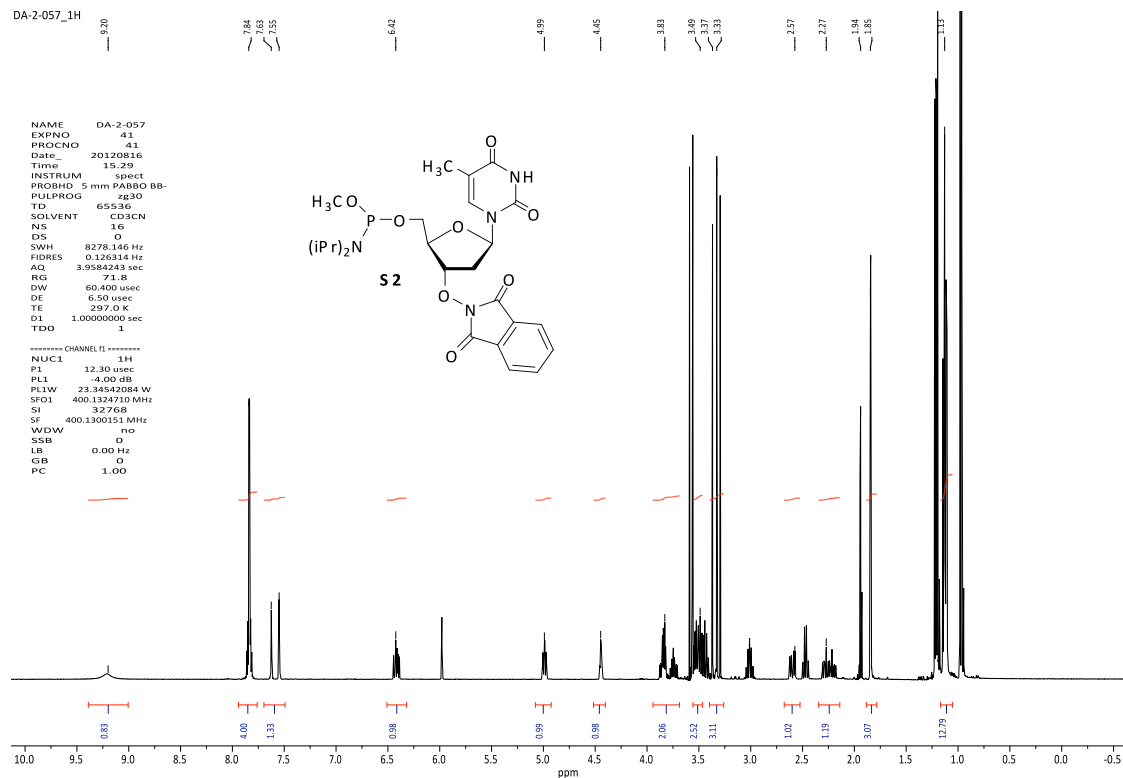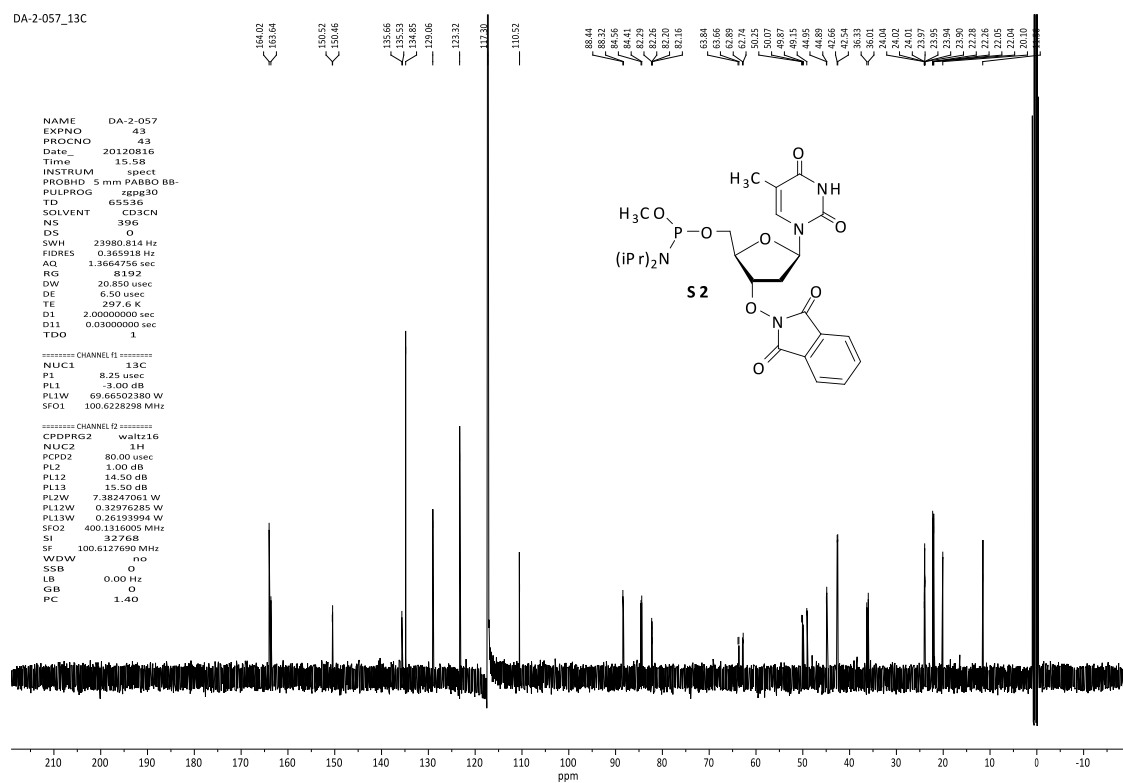

Supporting Information Figure 20. <sup>1</sup>H and <sup>13</sup>C NMR spectra of S2 in acetonitrile-d<sub>3</sub>.

DA-2-057\_31P

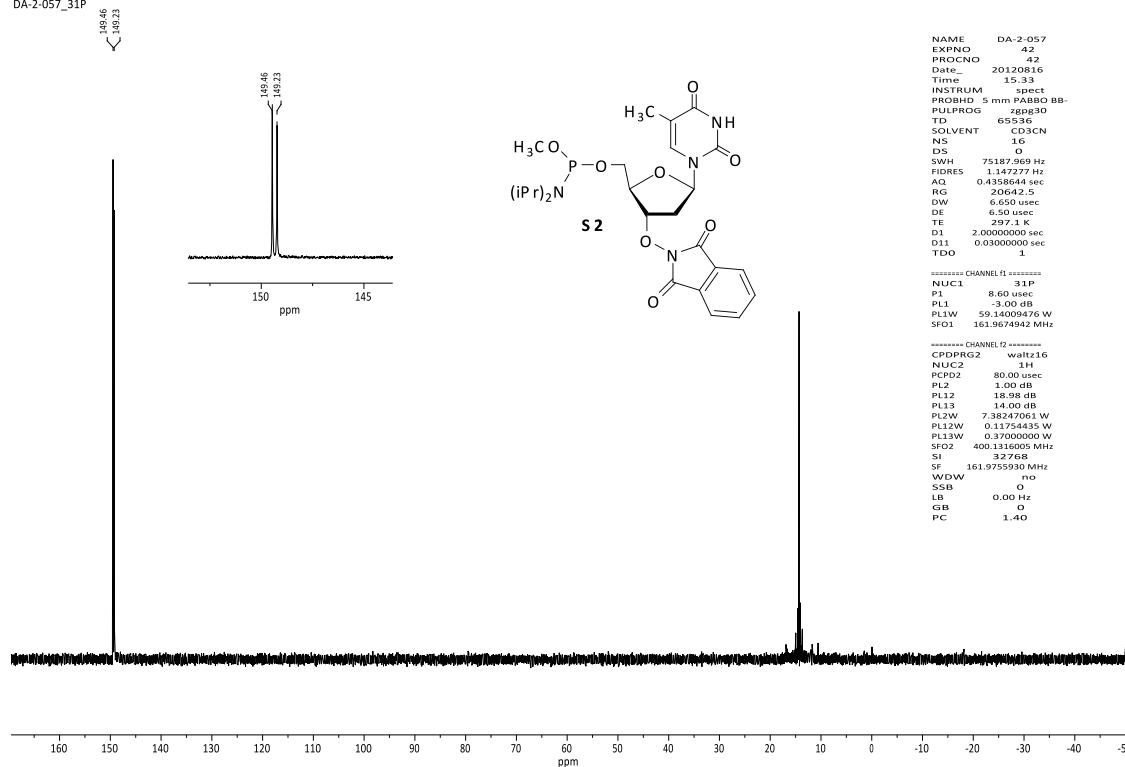

Supporting Information Figure 21.  $^{31}\text{P}$  NMR spectrum of **S2** in acetonitrile- $\text{d}_3$ .

DA-2-064\_1H

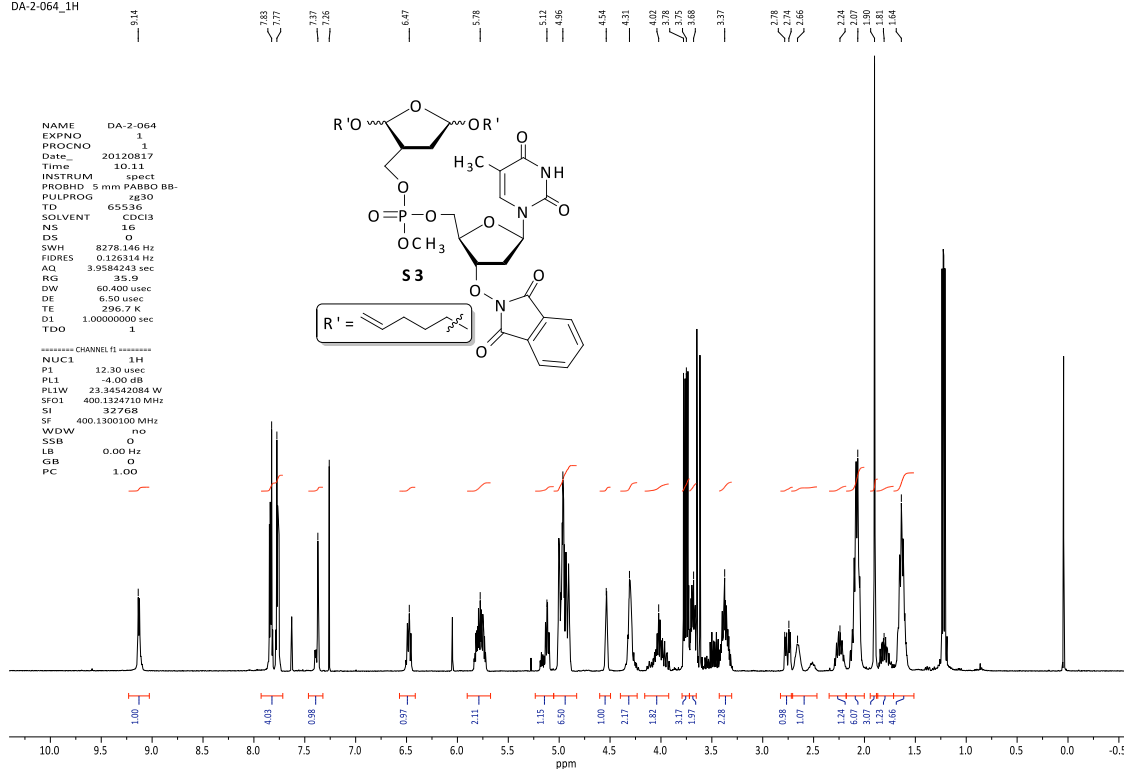

DA-2-064\_13C

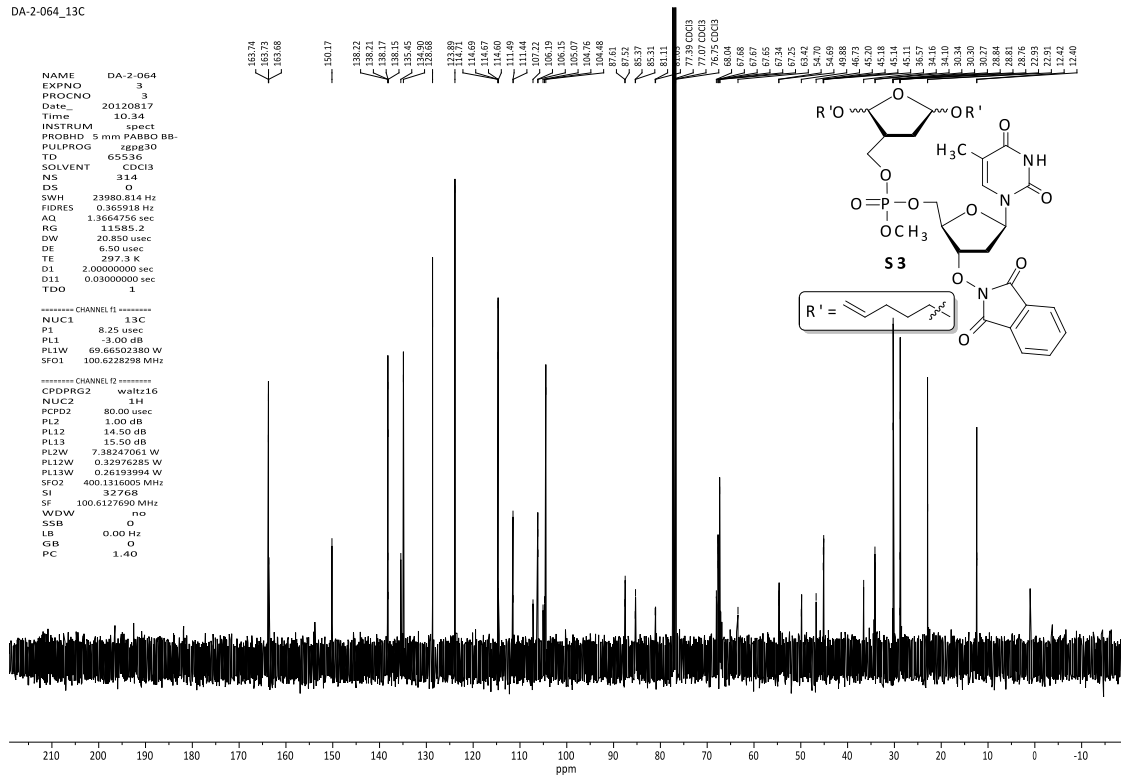Supporting Information Figure 22. <sup>1</sup>H and <sup>13</sup>C NMR spectra of S3 in CDCl<sub>3</sub>.

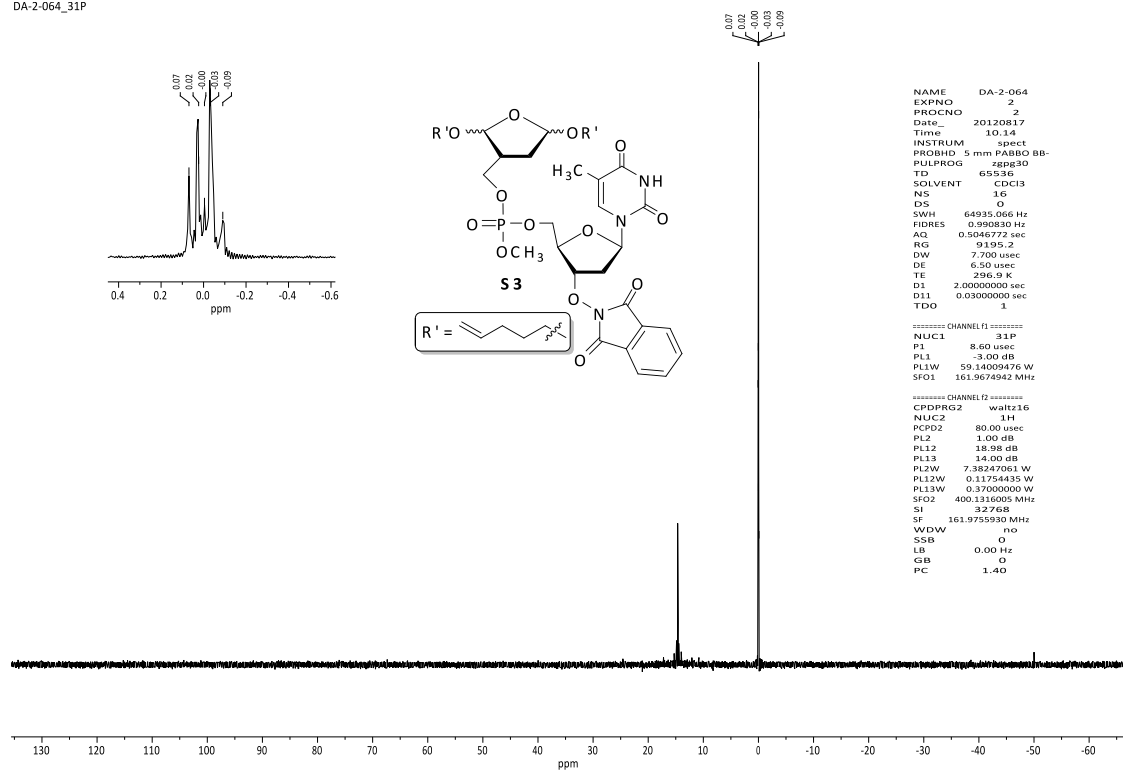

Supporting Information Figure 23.  $^{31}\text{P}$  NMR spectrum of S3 in  $\text{CDCl}_3$ .

DA-2-066\_1H

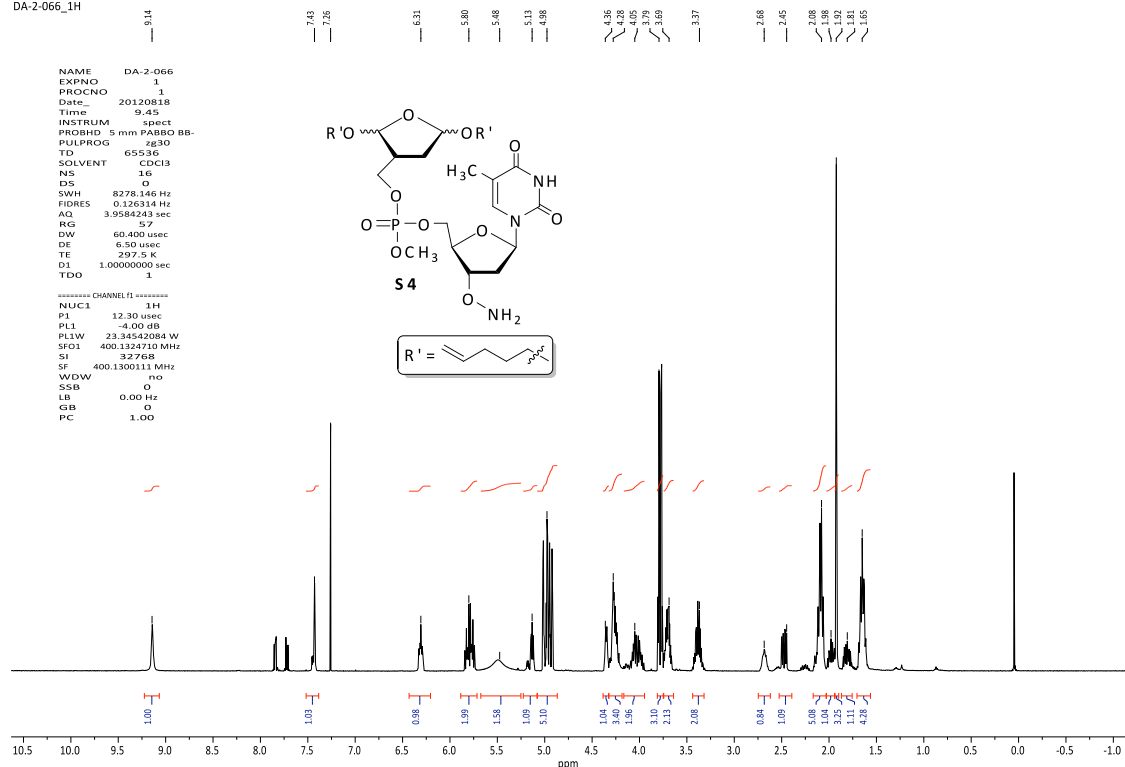

DA-2-066\_13C

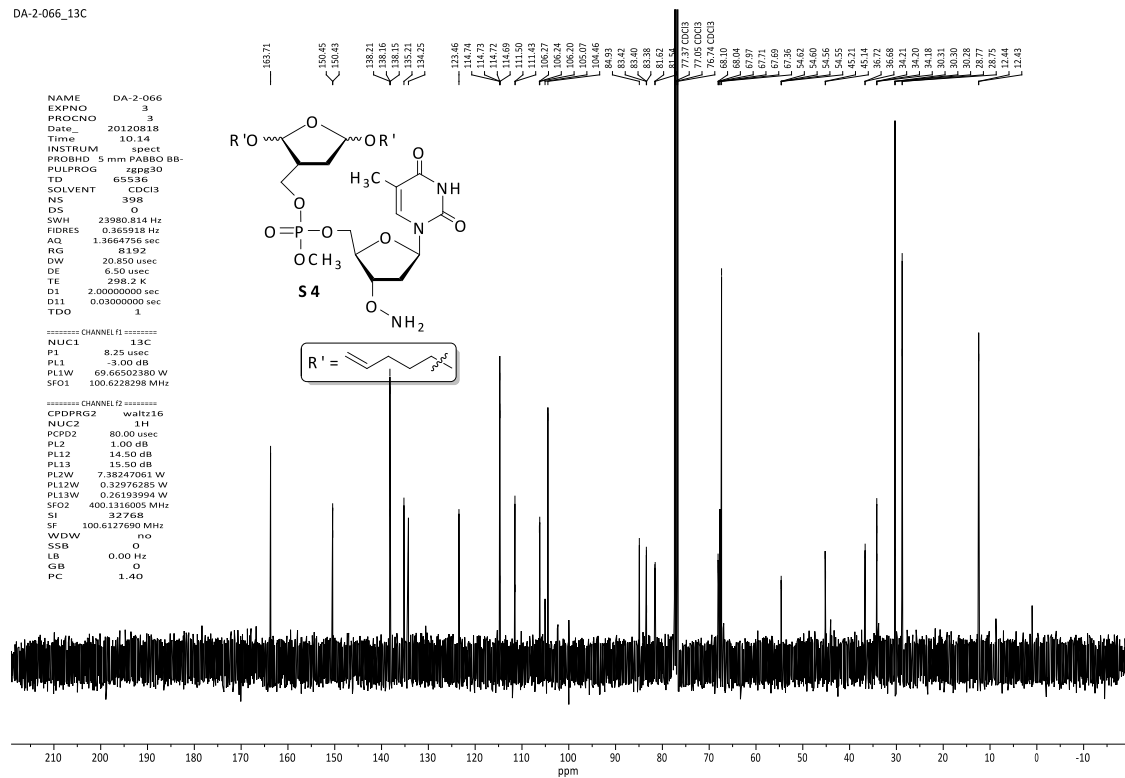

Supporting Information Figure 24. <sup>1</sup>H and <sup>13</sup>C NMR spectra of S4 in CDCl<sub>3</sub>.

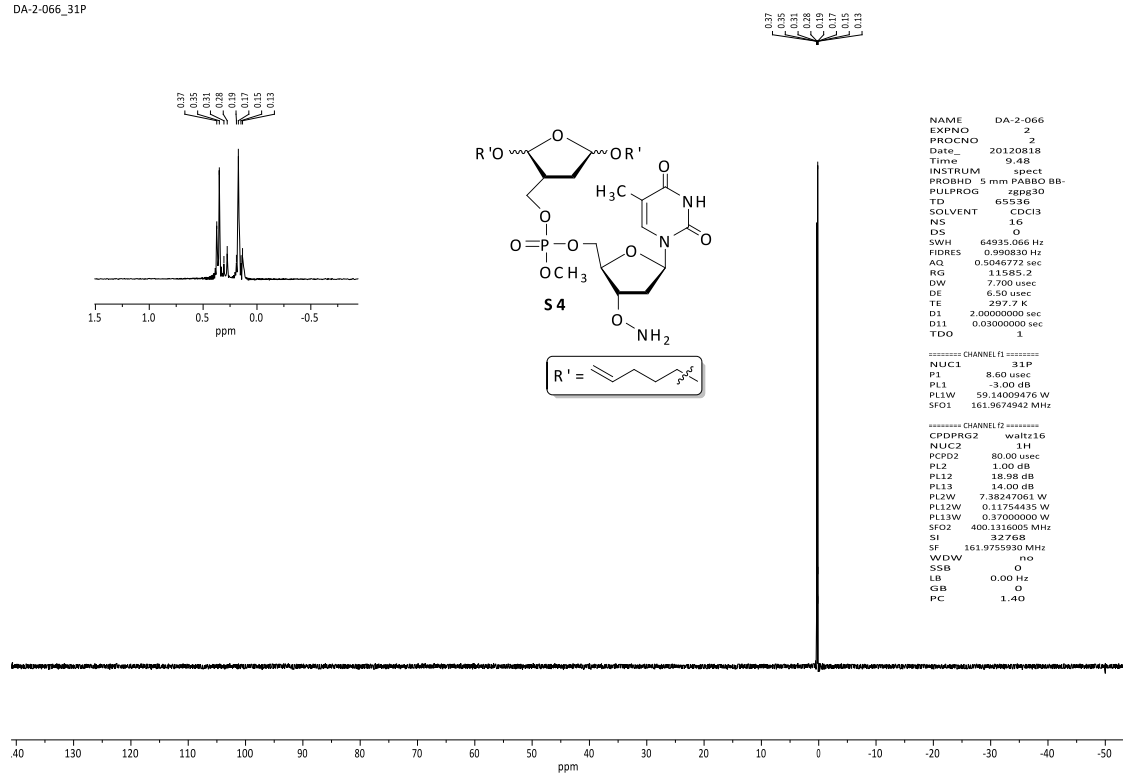

Supporting Information Figure 25. <sup>31</sup>P NMR spectrum of **S4** in CDCl<sub>3</sub>.



DA-2-068\_1H

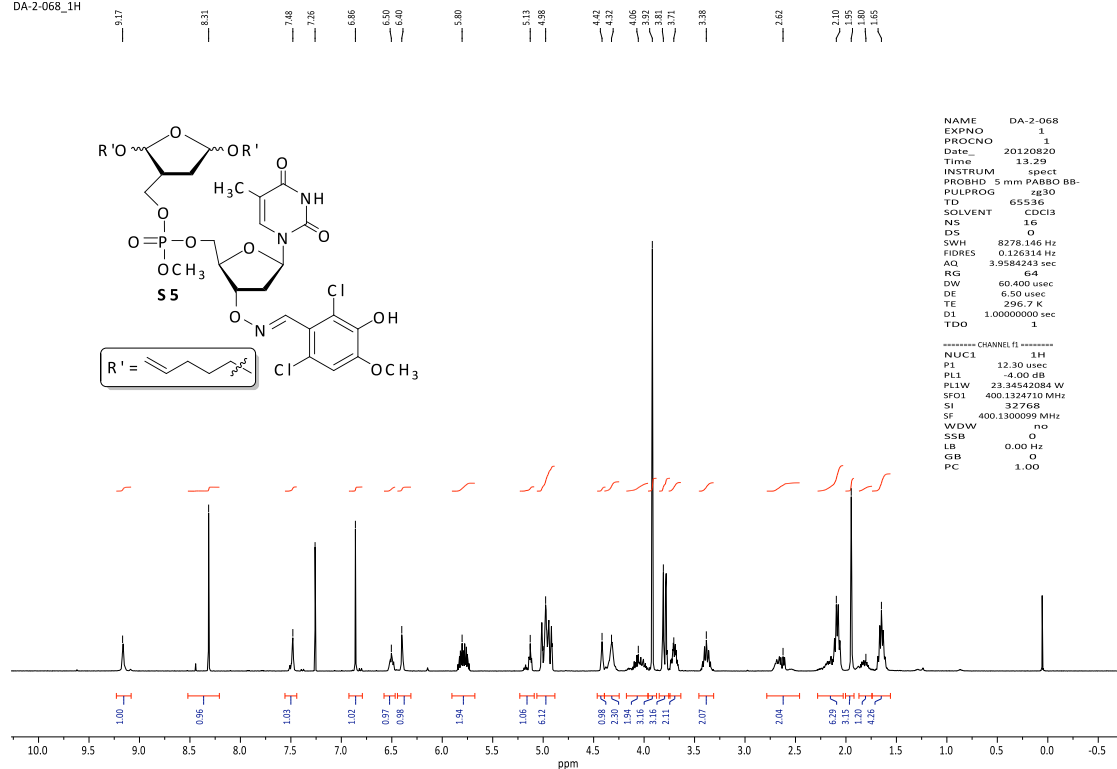

```

NAME      DA-2-068
EXPNO     1
PROCNO    1
Date_     20120820
Time      13.29
INSTRUM   spect
PROBHD    5 mm PABBO BB-
PULPROG   zg30
TD         65536
SOLVENT   CDCl3
NS         16
DS         0
SWH        8278.146 Hz
FIDRES     0.126314 Hz
AQ         3.9584243 sec
RG         64
DW         60.400 usec
DE         6.50 usec
TE         295.7 K
D1         1.0000000 sec
TDO        1

===== CHANNEL f1 =====
NUC1       13C
P1         12.30 usec
PL1        -4.00 dB
PL1W       23.34542084 W
SFO1       400.1324710 MHz
SI         32768
SF         400.1300099 MHz
WDW        no
SSB        0
LB         0.00 Hz
GB         0
PC         1.00

```

DA-2-068\_13C

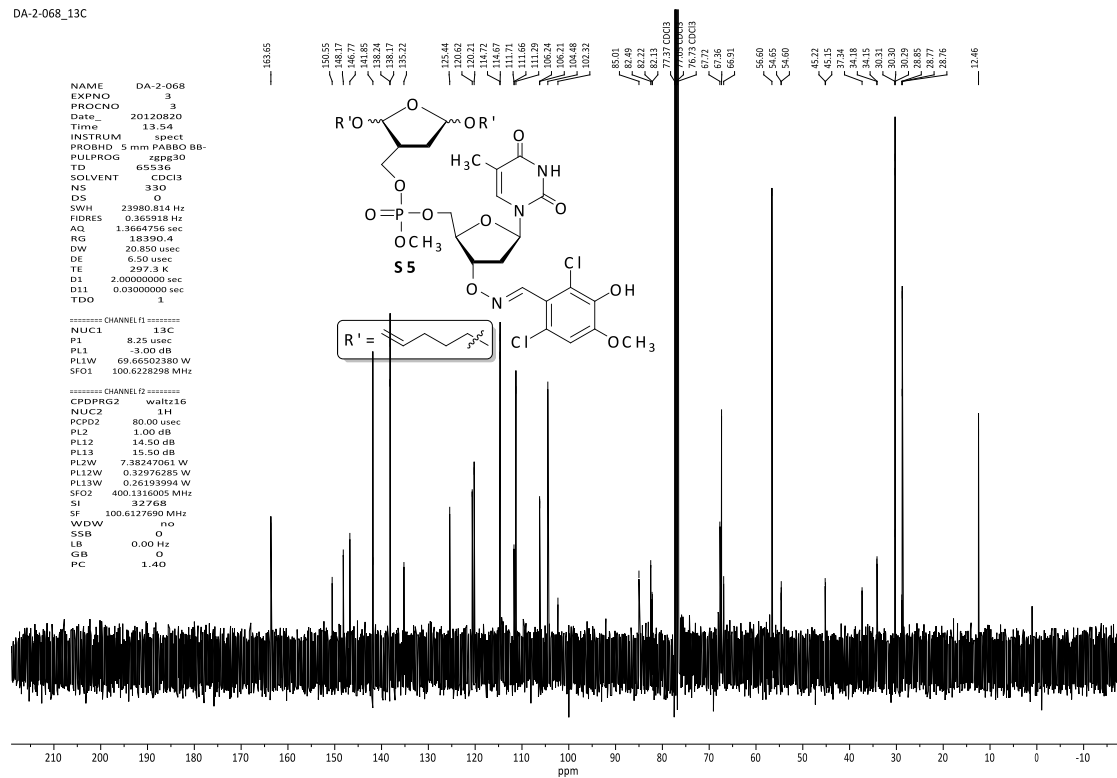

```

NAME      DA-2-068
EXPNO     3
PROCNO    3
Date_     20120820
Time      13.54
INSTRUM   spect
PROBHD    5 mm PABBO BB-
PULPROG   zgpg30
TD         65536
SOLVENT   CDCl3
NS         330
DS         0
SWH        23980.814 Hz
FIDRES     0.365918 Hz
AQ         1.3664756 sec
RG         18390.4
DW         20.850 usec
DE         6.50 usec
TE         297.3 K
D1         2.0000000 sec
D11        0.0300000 sec
TDO        1

===== CHANNEL f1 =====
NUC1       13C
P1         8.25 usec
PL1        -3.00 dB
PL1W       69.66500380 W
SFO1       100.6228298 MHz

===== CHANNEL f2 =====
CPDPRG2   waltz16
NUC2       1H
PCPD2     80.00 usec
PL2        1.00 dB
PL12      14.50 dB
PL13      15.50 dB
PL2W      7.38247061 W
PL12W     0.32976285 W
PL13W     0.26193994 W
SFO2     400.1316005 MHz
SI         32768
SF        100.6127690 MHz
WDW        no
SSB        0
LB         0.00 Hz
GB         0
PC         1.40

```

Supporting Information Figure 26. <sup>1</sup>H and <sup>13</sup>C NMR spectra of S5 in CDCl<sub>3</sub>.

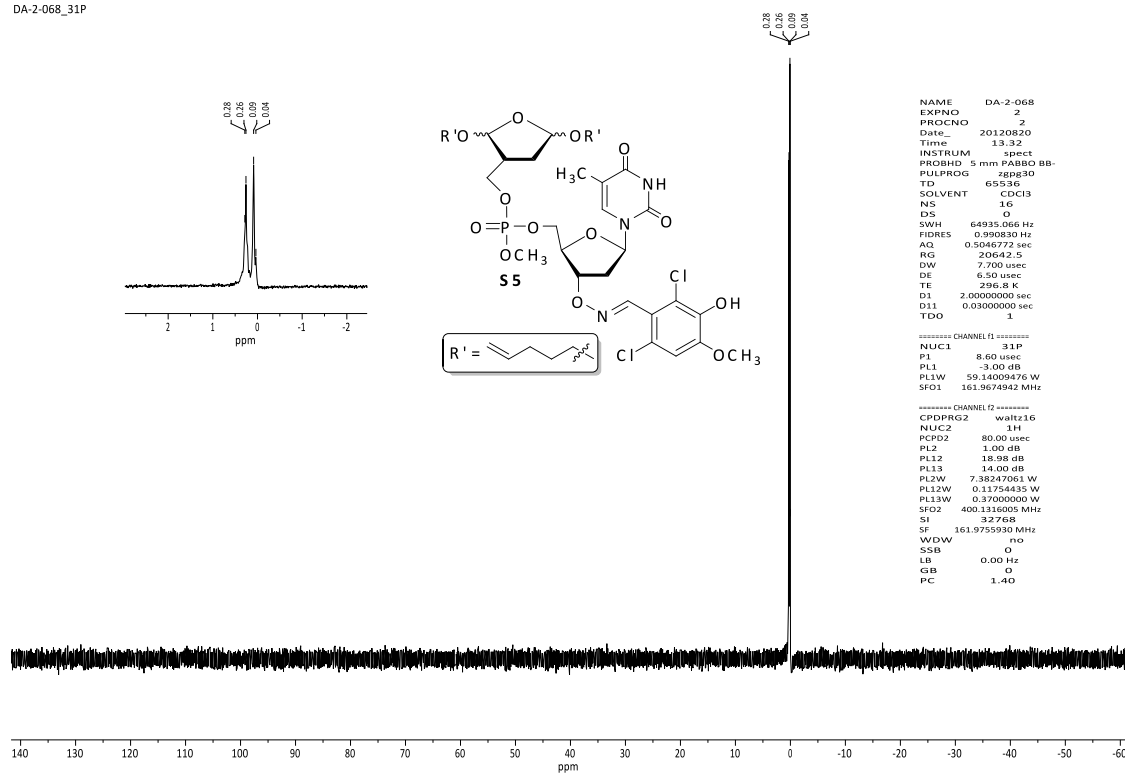

Supporting Information Figure 27.  $^{31}\text{P}$  NMR spectrum of **S5** in  $\text{CDCl}_3$ .

DA-2-072\_1H

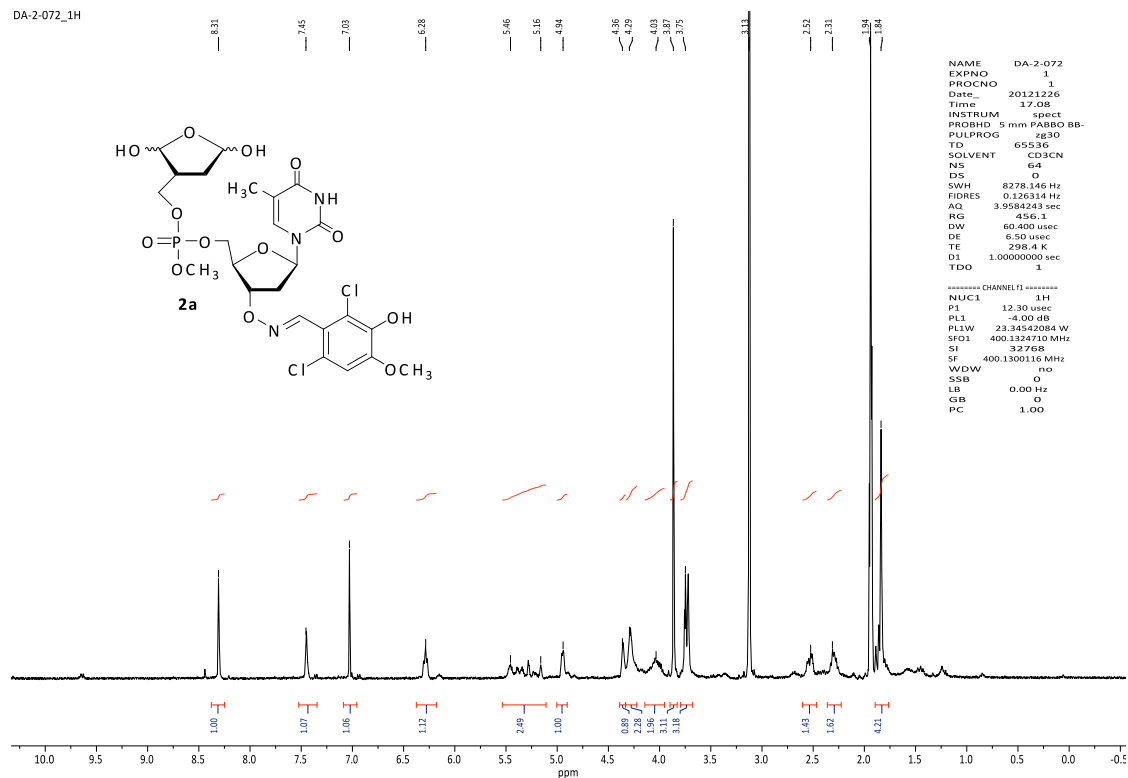

```

NAME DA-2-072
EXPNO 1
PROCNO 1
Date_ 20121226
Time 17.08
INSTRUM spect
PROBHD 5 mm PABBO BB-
PULPROG zg30
TD 65536
SOLVENT CD3CN
NS 64
DS 0
SWH 8278.166 Hz
FIDRES 0.126314 Hz
AQ 3.9584243 sec
RG 456.1
DW 60.400 usec
DE 6.50 usec
TE 298.4 K
D1 1.00000000 sec
TDO 1
===== CHANNEL f1 =====
NUC1 1H
P1 12.30 usec
PL1 -4.00 dB
PL1W 23.34440084 W
SFO1 400.1324710 MHz
SI 32768
SF 400.1300116 MHz
WDW no
SSB 0
LB 0.00 Hz
GB 0
PC 1.00
  
```

DA-2-072\_31P

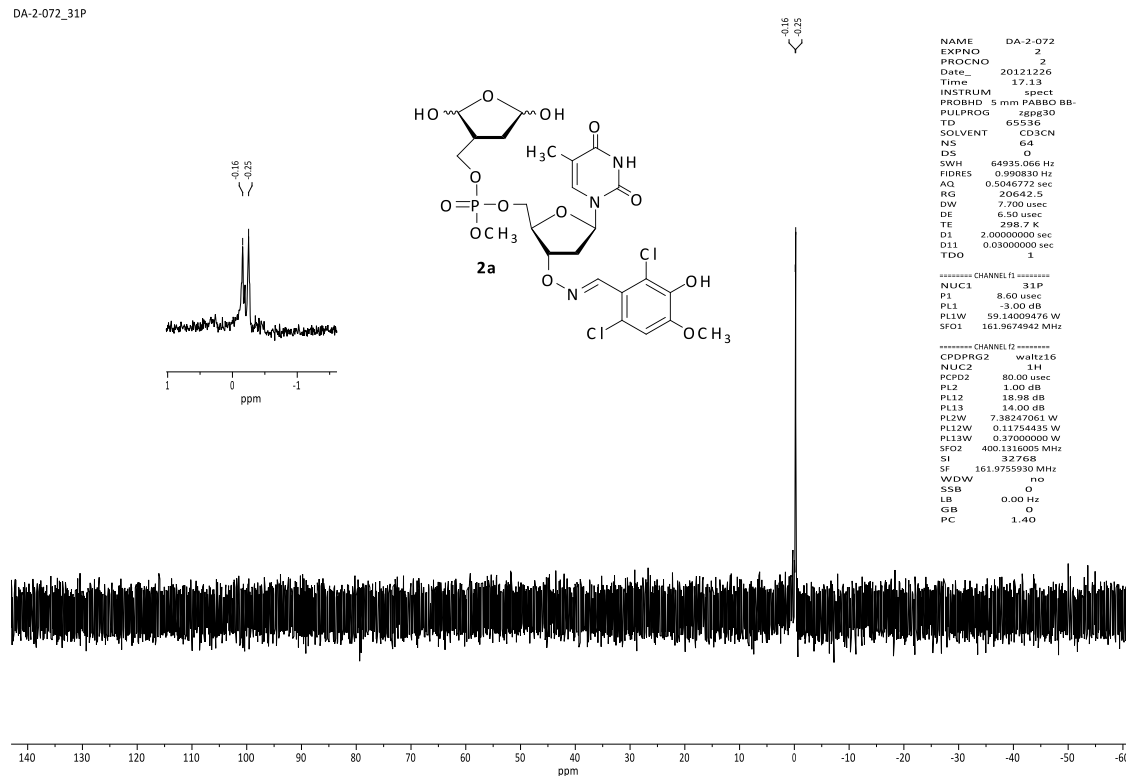

```

NAME DA-2-072
EXPNO 2
PROCNO 2
Date_ 20121226
Time 17.13
INSTRUM spect
PROBHD 5 mm PABBO BB-
PULPROG zgpg30
TD 65536
SOLVENT CD3CN
NS 64
DS 0
SWH 64935.066 Hz
FIDRES 0.990830 Hz
AQ 0.5096772 sec
RG 20642.5
DW 7.700 usec
DE 6.50 usec
TE 298.7 K
D1 2.00000000 sec
D11 0.03000000 sec
TDO 1
===== CHANNEL f1 =====
NUC1 31P
P1 8.60 usec
PL1 -3.00 dB
PL1W 59.14009976 W
SFO1 161.9674942 MHz
===== CHANNEL f2 =====
CPDPRG2 waltz16
NUC2 1H
PCPD2 80.00 usec
PL2 1.00 dB
PL12 18.98 dB
PL13 14.00 dB
PL1W 7.38247061 W
PL2W 0.11754435 W
PL3W 0.37000000 W
SFO2 400.1316005 MHz
SI 32768
SF 161.9755930 MHz
WDW no
SSB 0
LB 0.00 Hz
GB 0
PC 1.40
  
```

Supporting Information Figure 28. <sup>1</sup>H and <sup>31</sup>P NMR spectra of **2a** in acetonitrile-d<sub>3</sub>.

DA-2-073\_1H

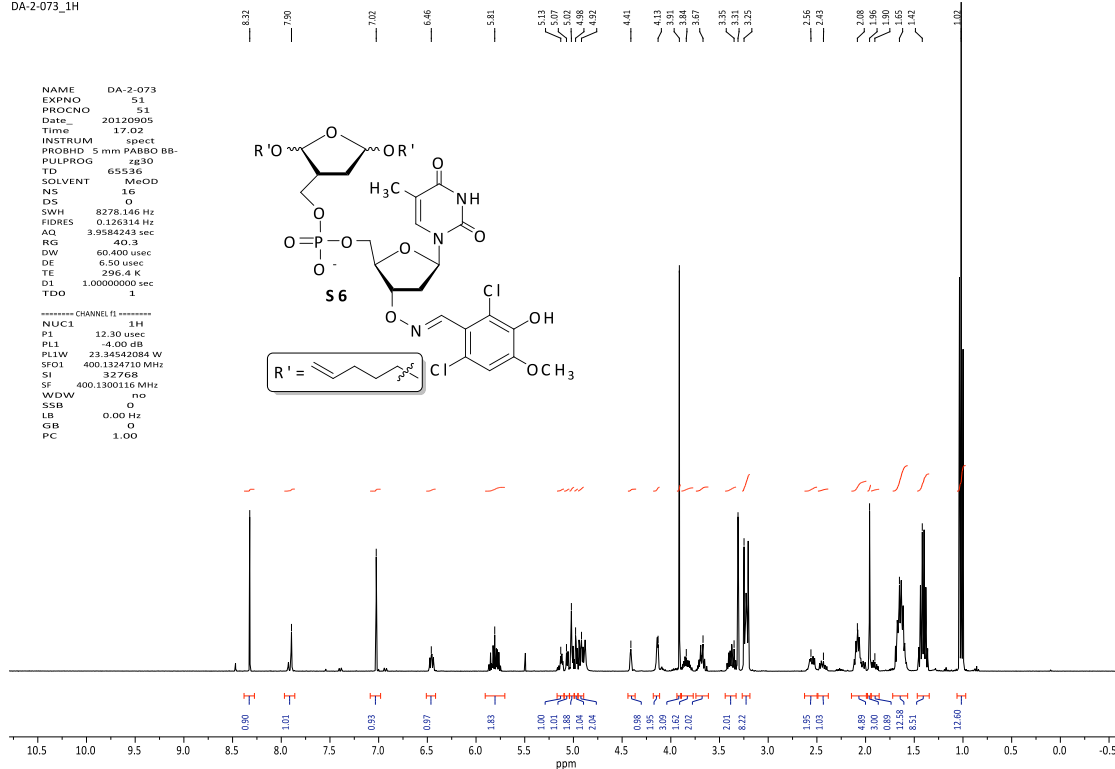

DA-2-073\_13C

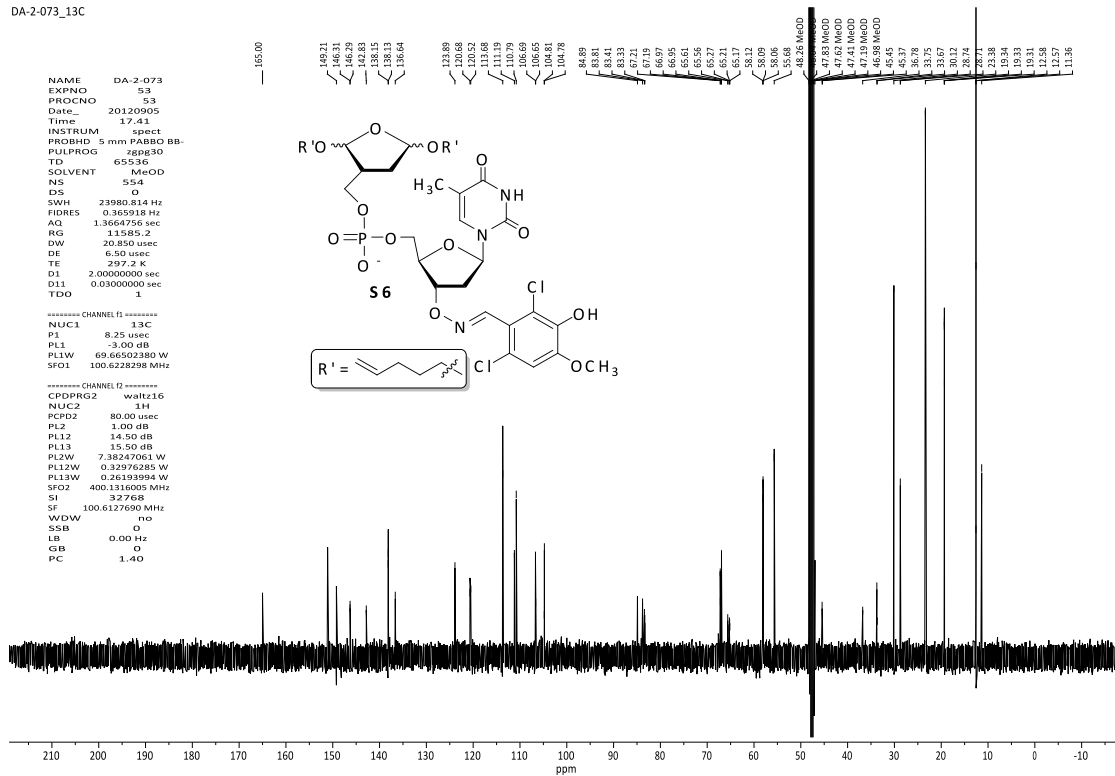Supporting Information Figure 29. <sup>1</sup>H and <sup>13</sup>C NMR spectra of S6 in methanol-d<sub>4</sub>.

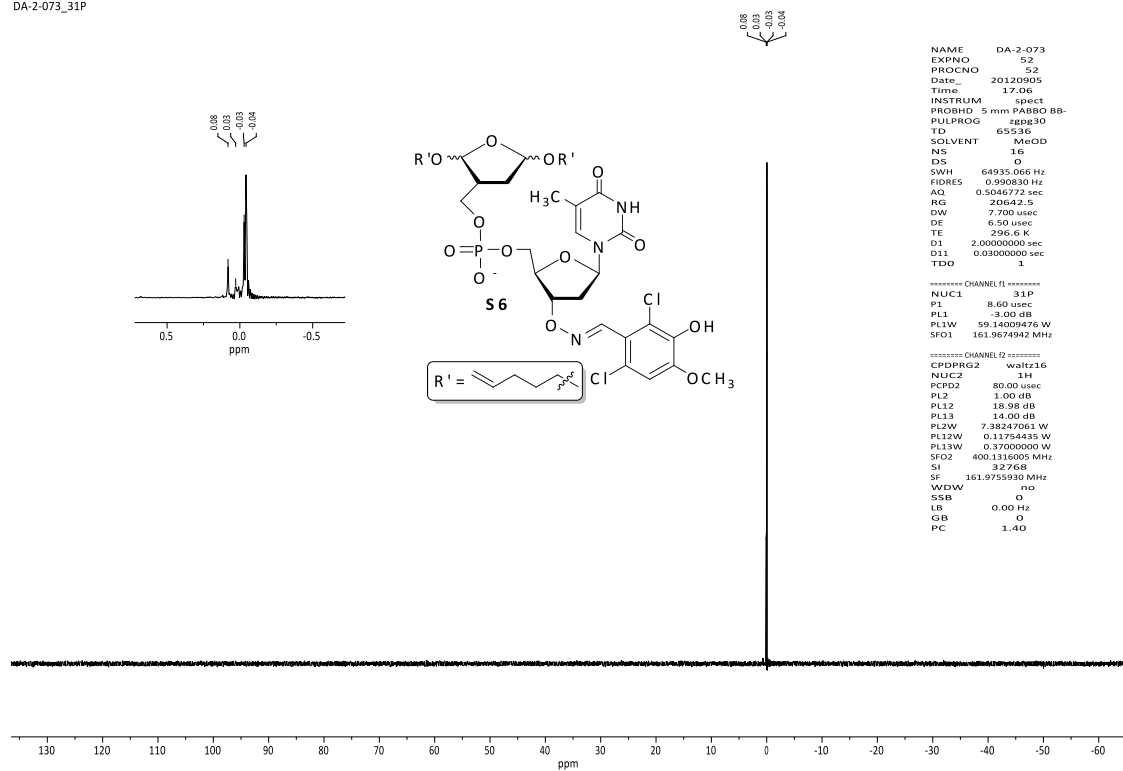

Supporting Information Figure 30. <sup>31</sup>P NMR spectrum of S6 in methanol-d<sub>4</sub>.

DA-2-088\_1H

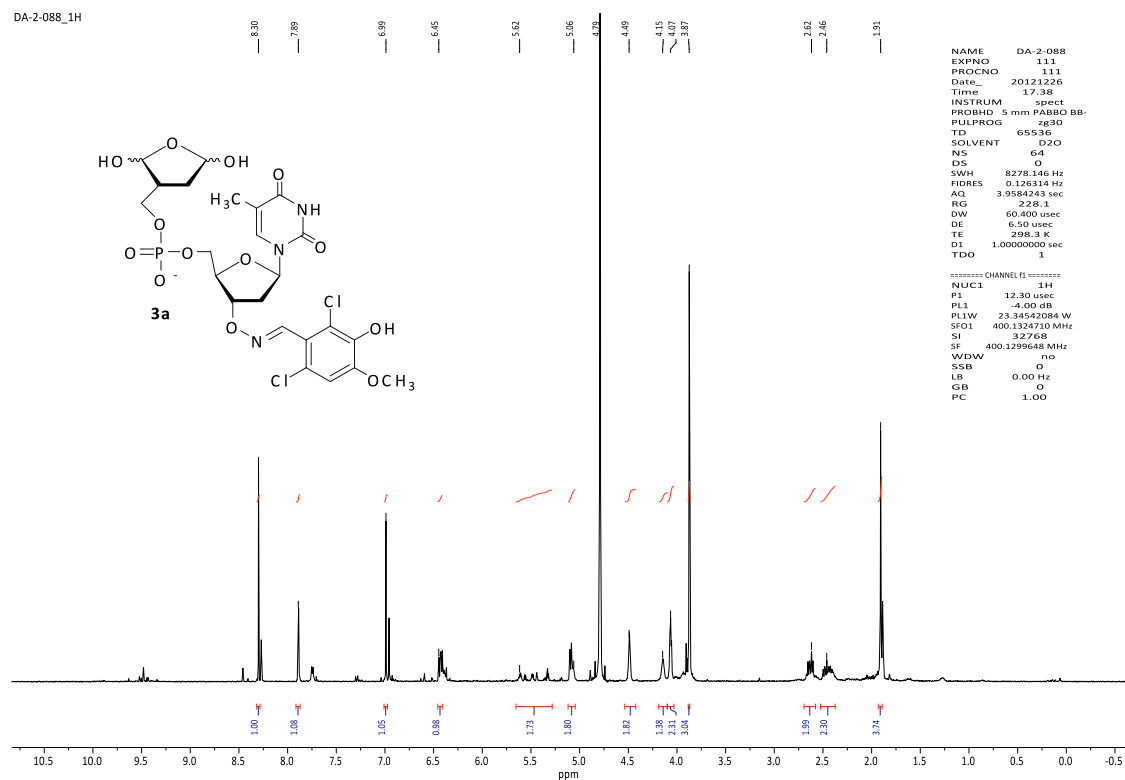

DA-2-088\_31P

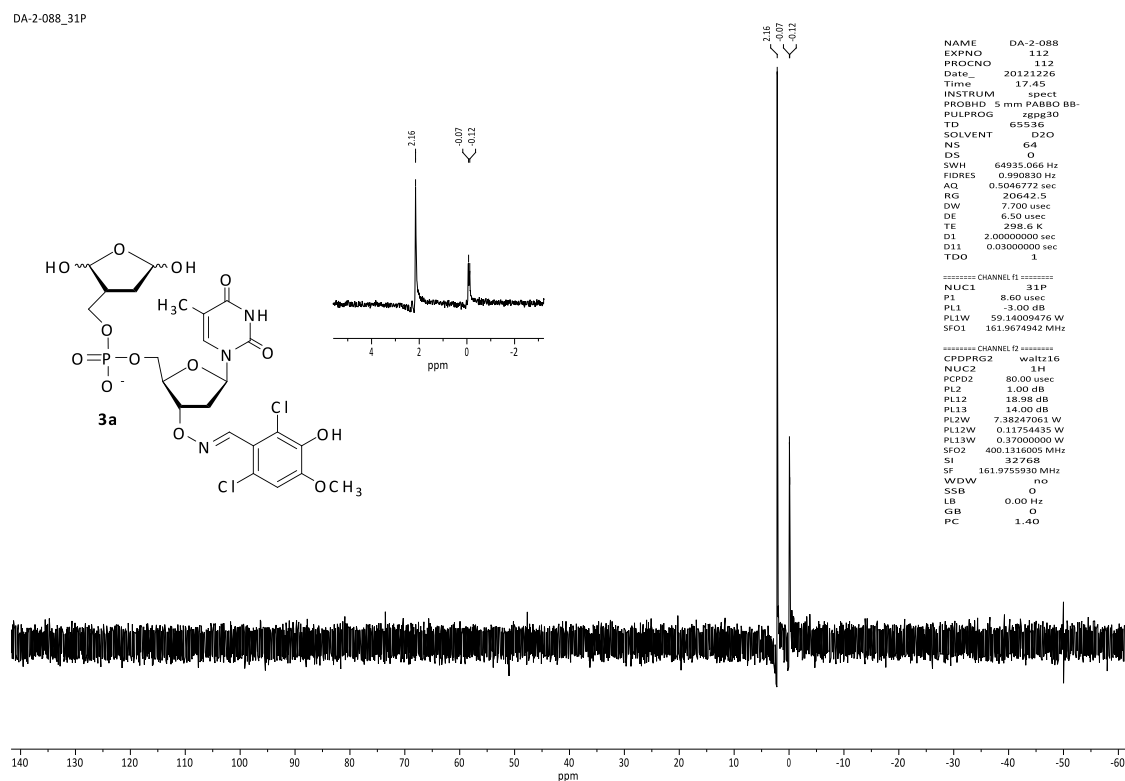Supporting Information Figure 31.  $^1\text{H}$  and  $^{31}\text{P}$  NMR spectra of **3a** in  $\text{D}_2\text{O}$ .

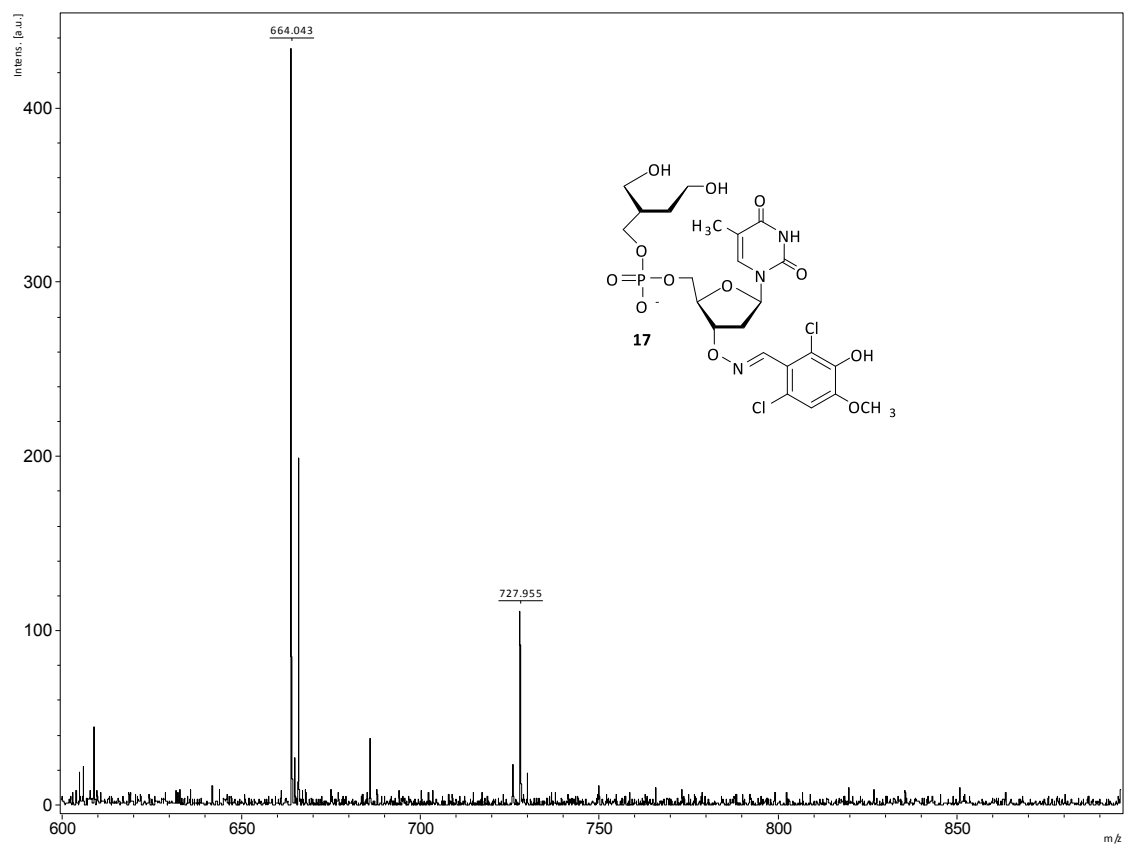

**Supporting Information Figure 32.** MALDI-TOF MS spectra of **17**.

DA-2-108\_1H

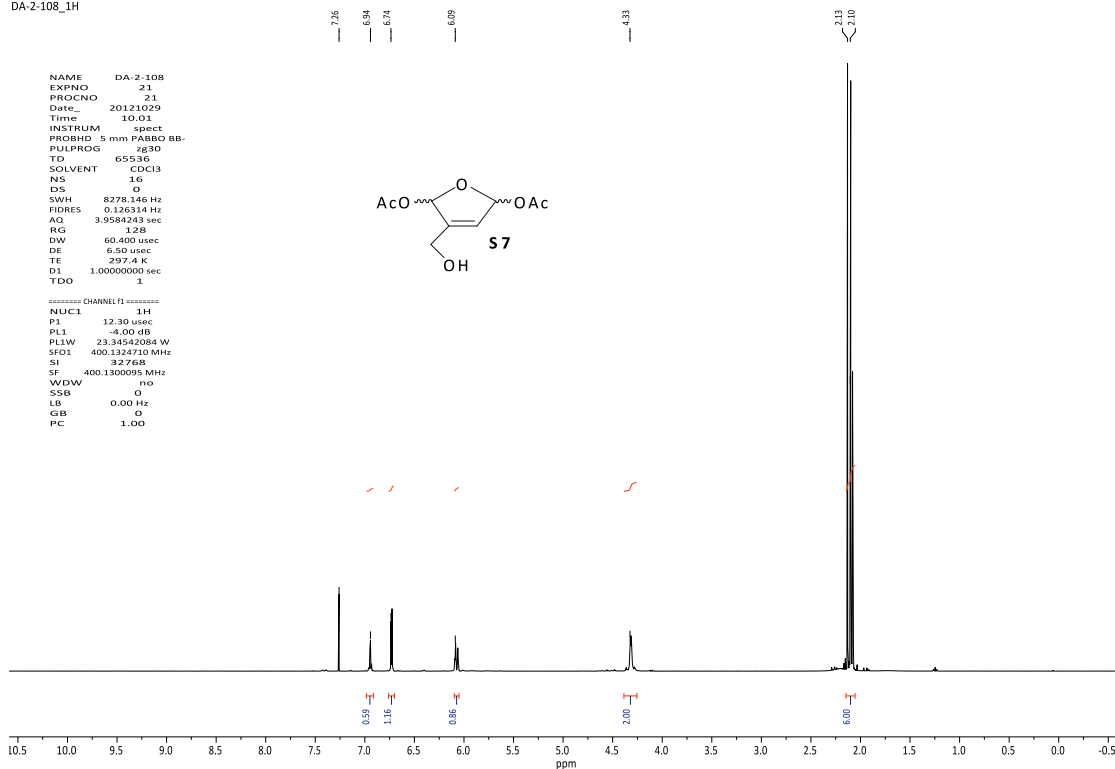

DA-2-108\_13C

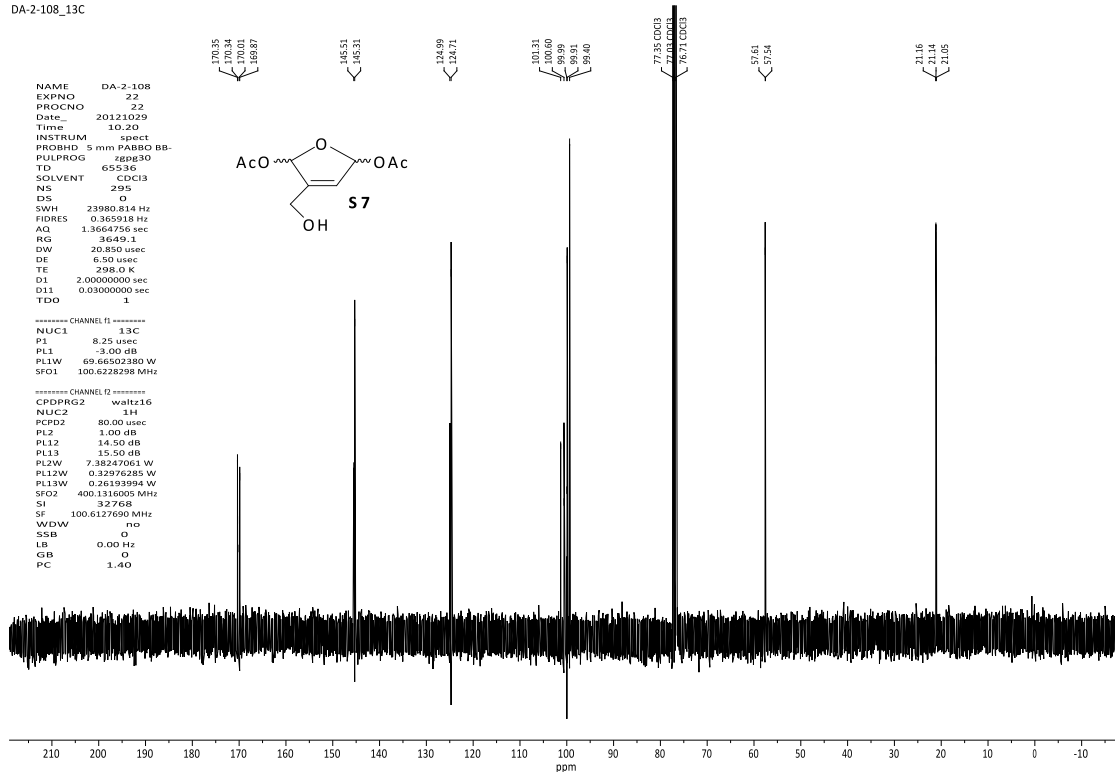

Supporting Information Figure 33. <sup>1</sup>H and <sup>13</sup>C NMR spectra of S7 in CDCl<sub>3</sub>.



DA-2-109\_1\_1H

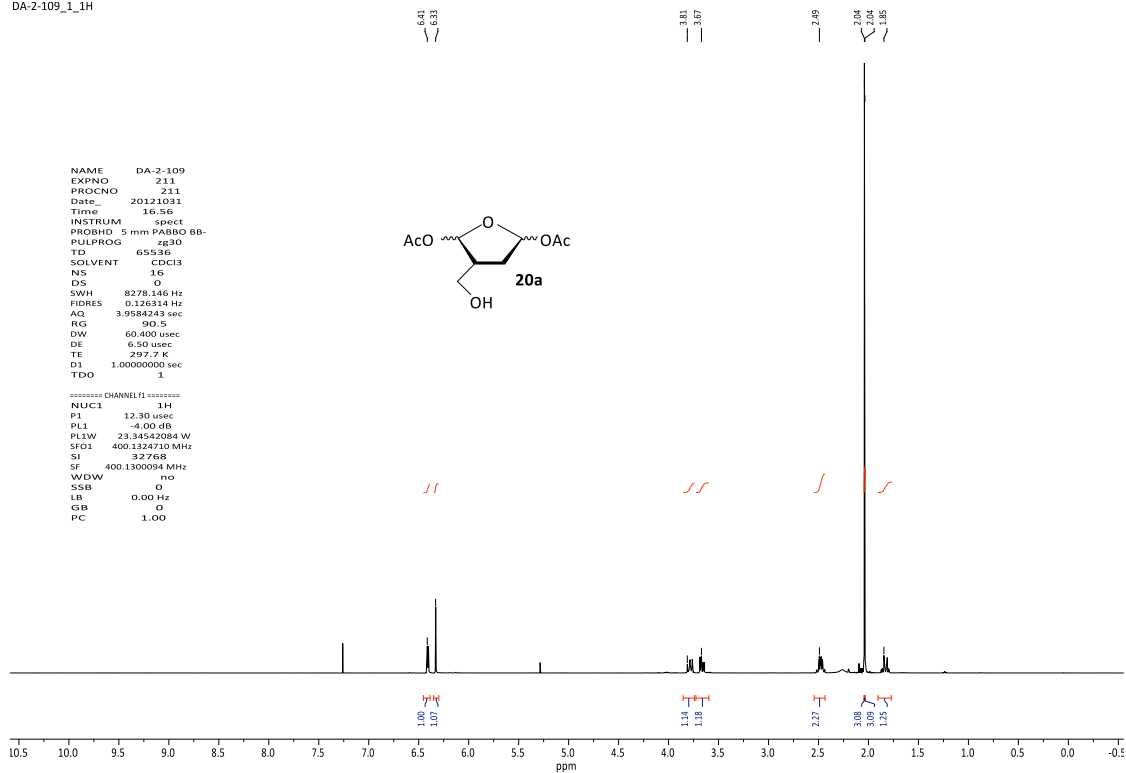

DA-2-109\_1\_13C

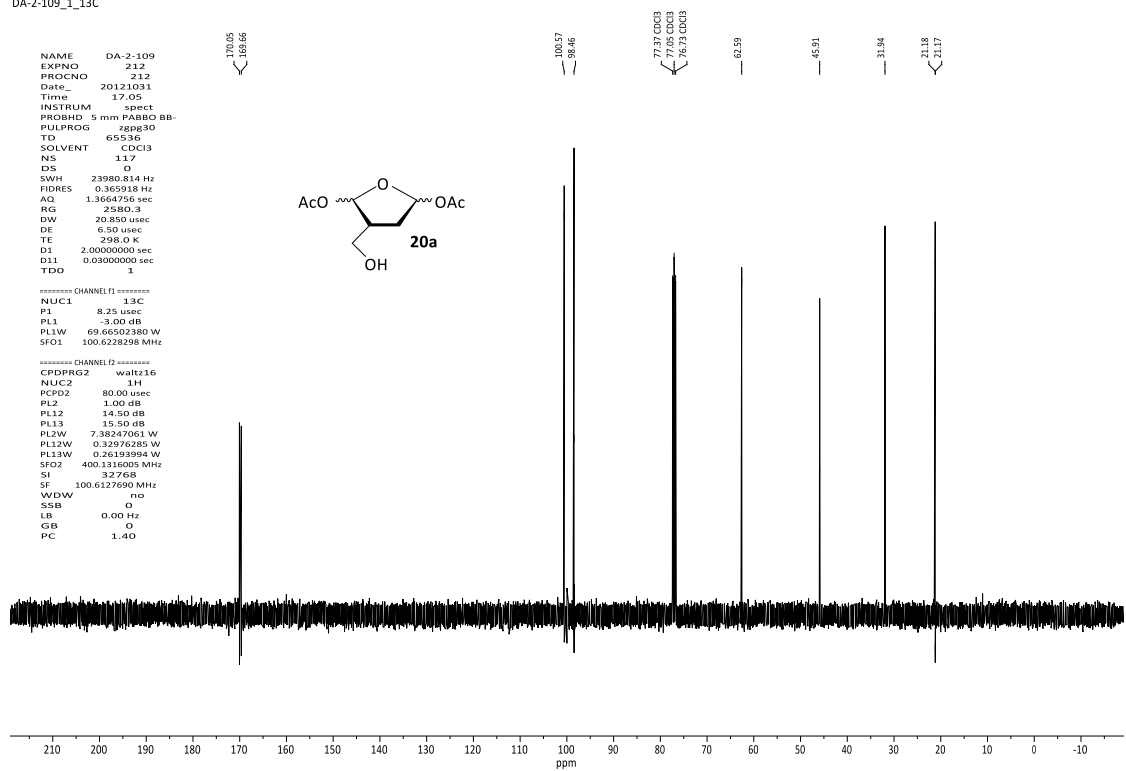

Supporting Information Figure 34. <sup>1</sup>H and <sup>13</sup>C NMR spectra of **20a** in CDCl<sub>3</sub>.

DA-2-109\_2\_1H

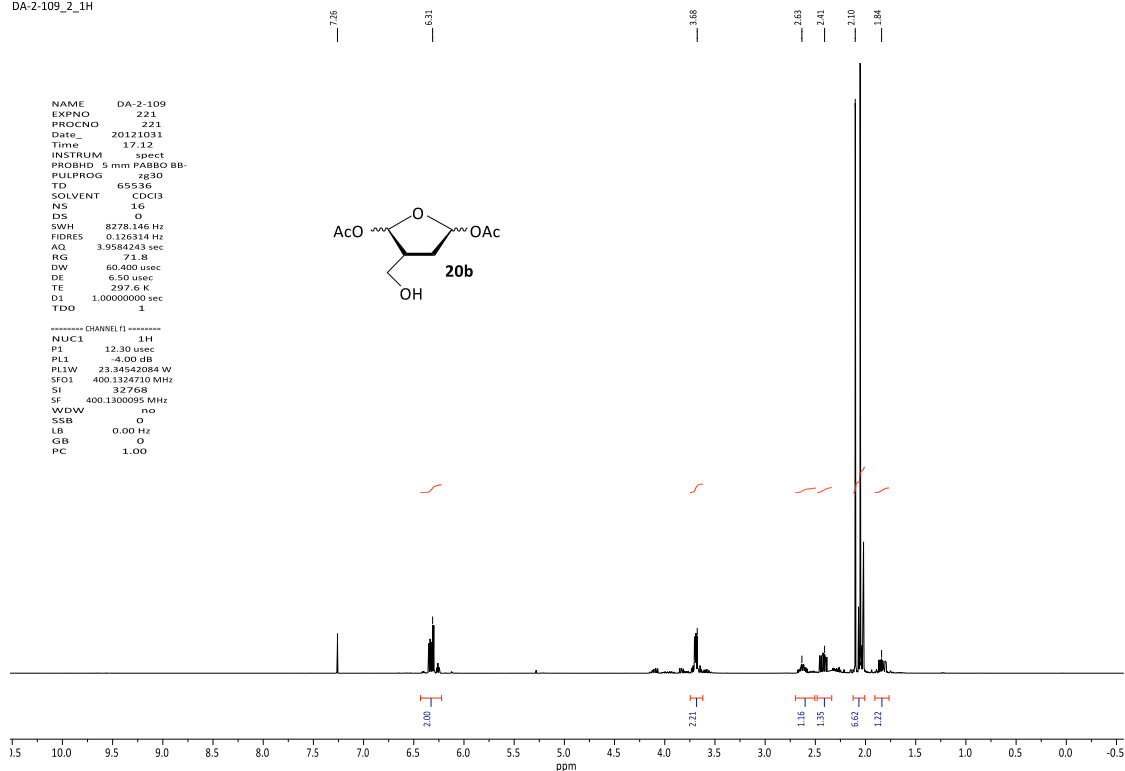

DA-2-109\_2\_13C

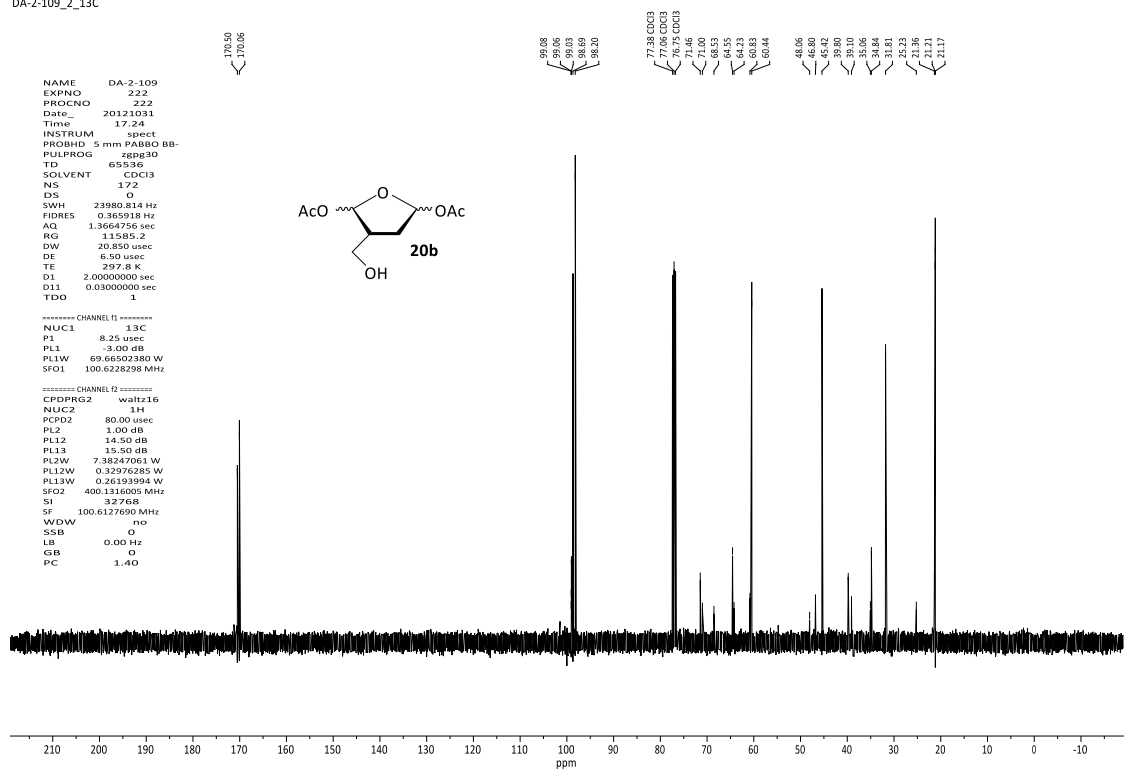

Supporting Information Figure 35. <sup>1</sup>H and <sup>13</sup>C NMR spectra of **20b** in CDCl<sub>3</sub>.



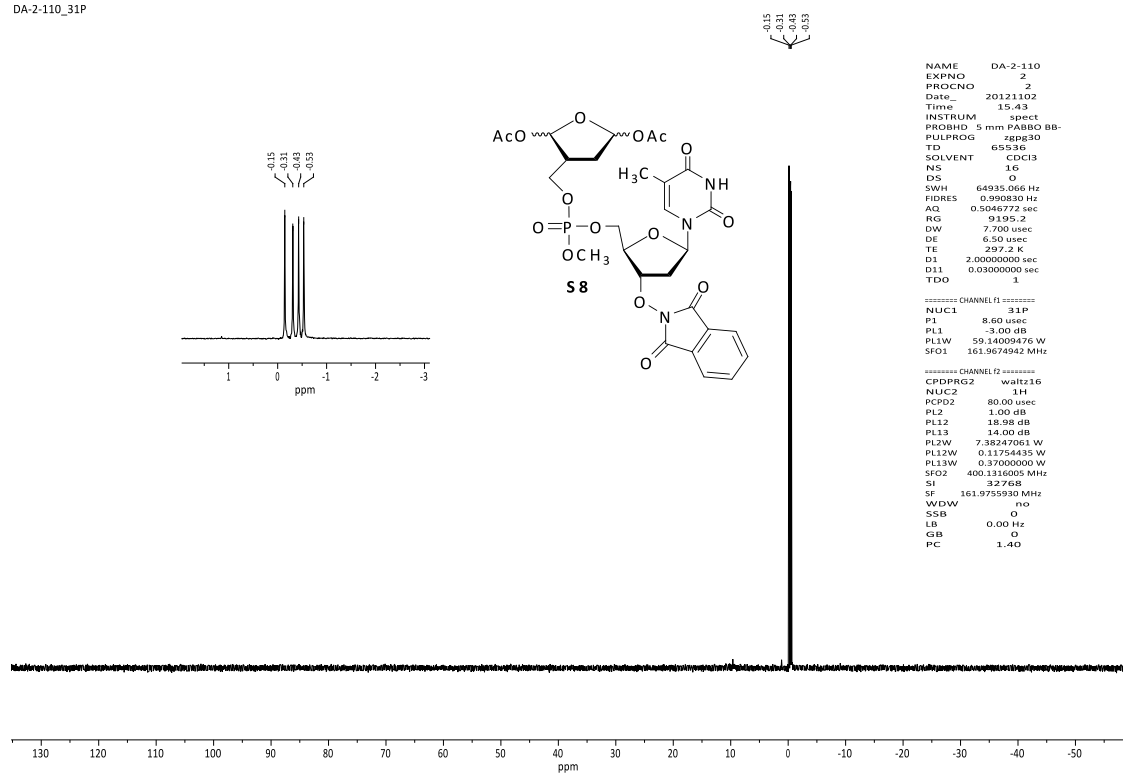

Supporting Information Figure 37. <sup>31</sup>P NMR spectrum of S8 in CDCl<sub>3</sub>.

DA-2-111\_1H

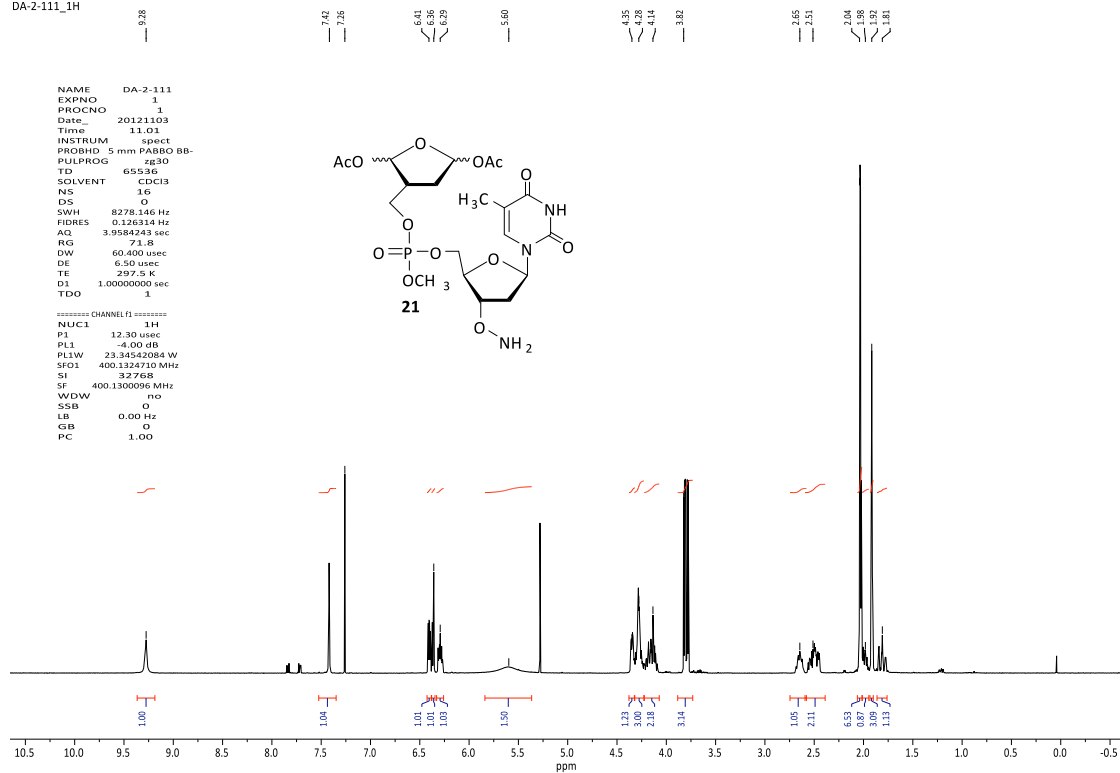

DA-2-111\_13C

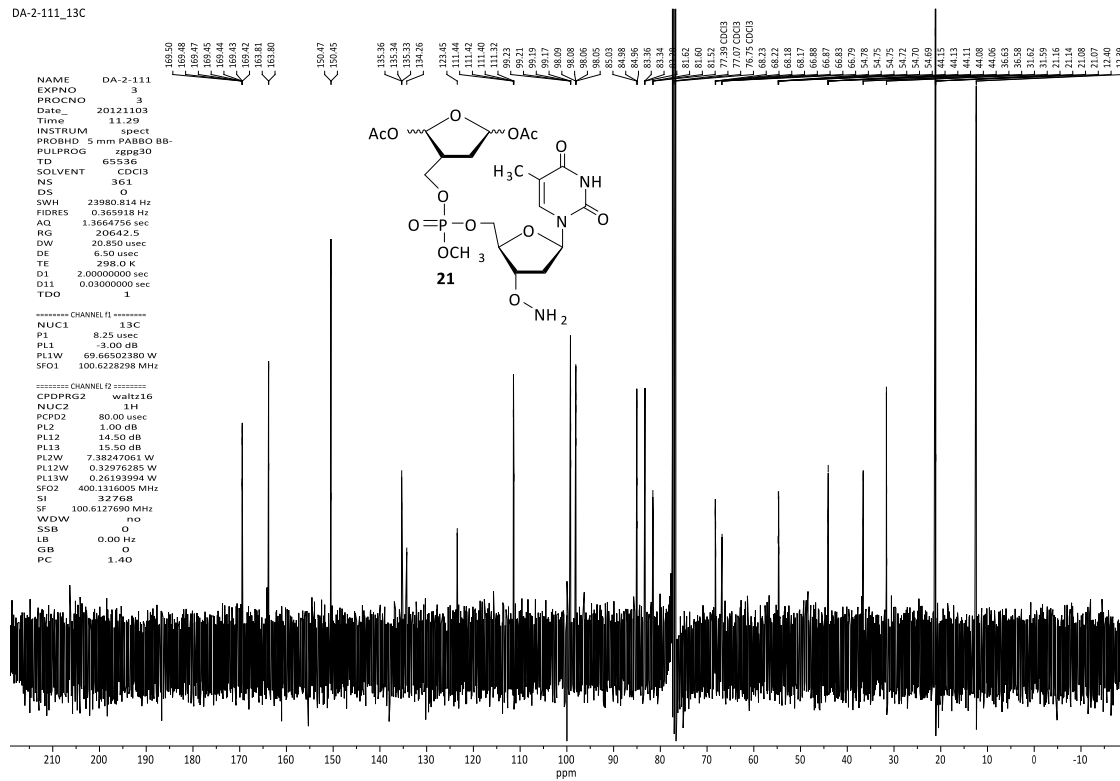Supporting Information Figure 38. <sup>1</sup>H and <sup>13</sup>C NMR spectra of **21** in CDCl<sub>3</sub>.

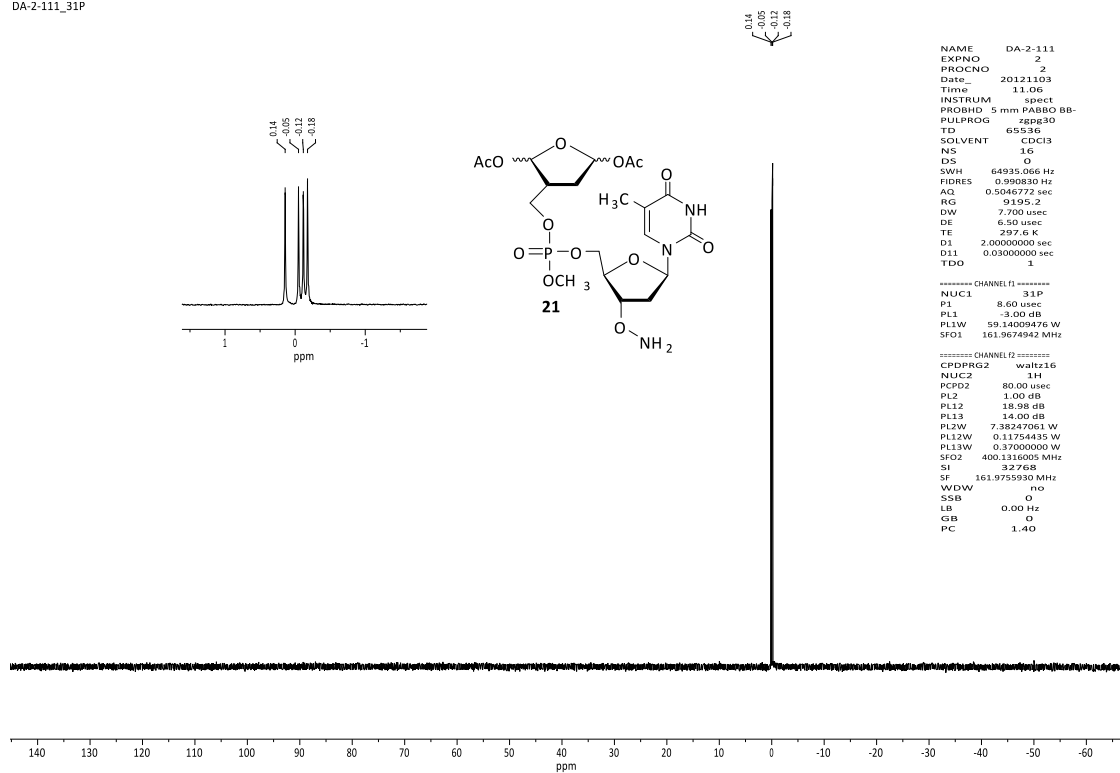

Supporting Information Figure 39.  $^{31}\text{P}$  NMR spectrum of **21** in  $\text{CDCl}_3$ .

DA-2-112\_1H

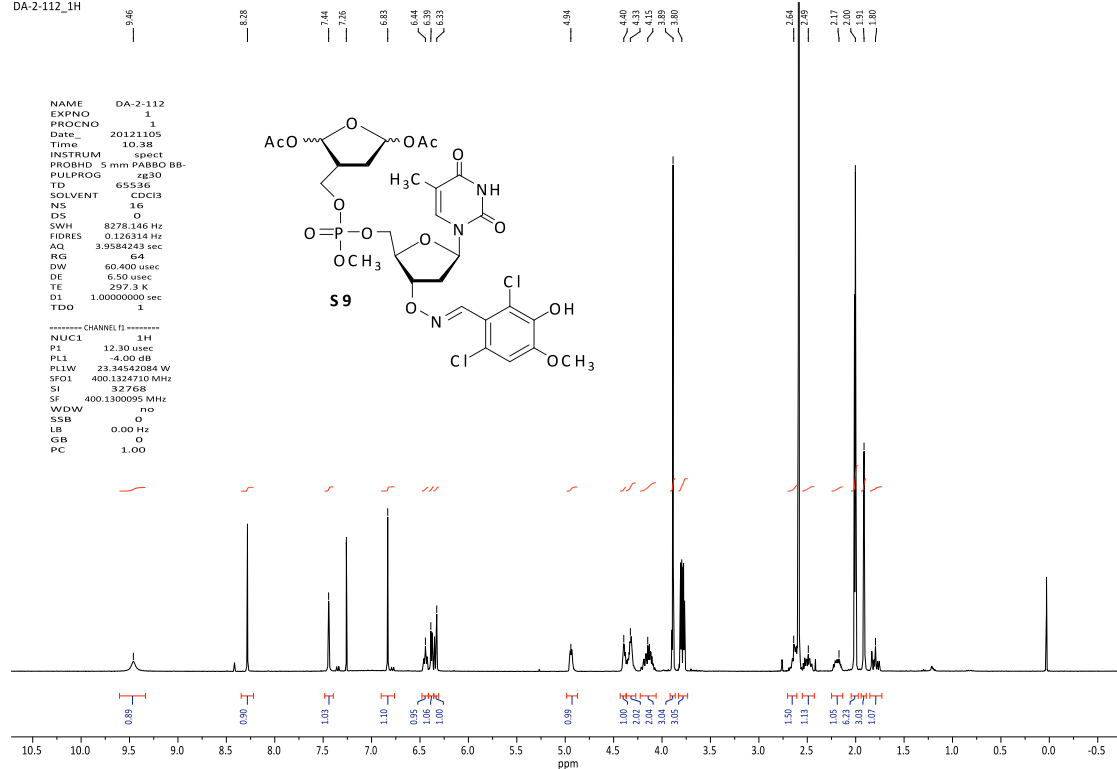

DA-2-112\_13C

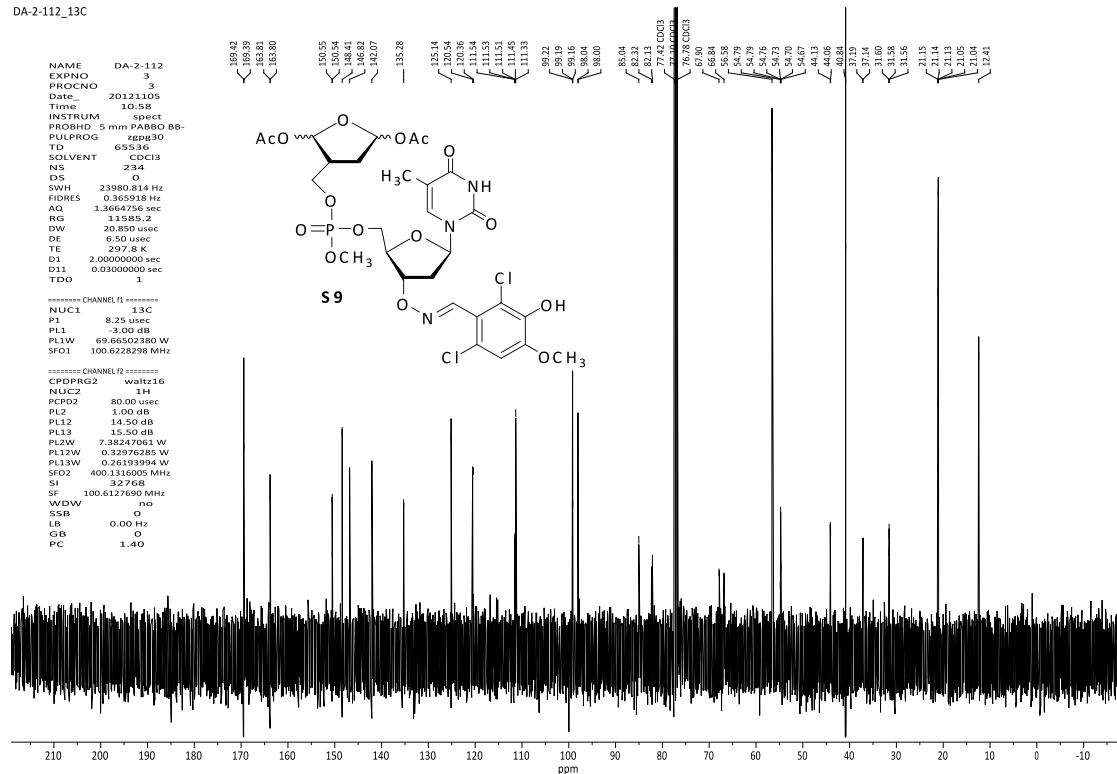Supporting Information Figure 40. <sup>1</sup>H and <sup>13</sup>C NMR spectra of S9 in CDCl<sub>3</sub>.

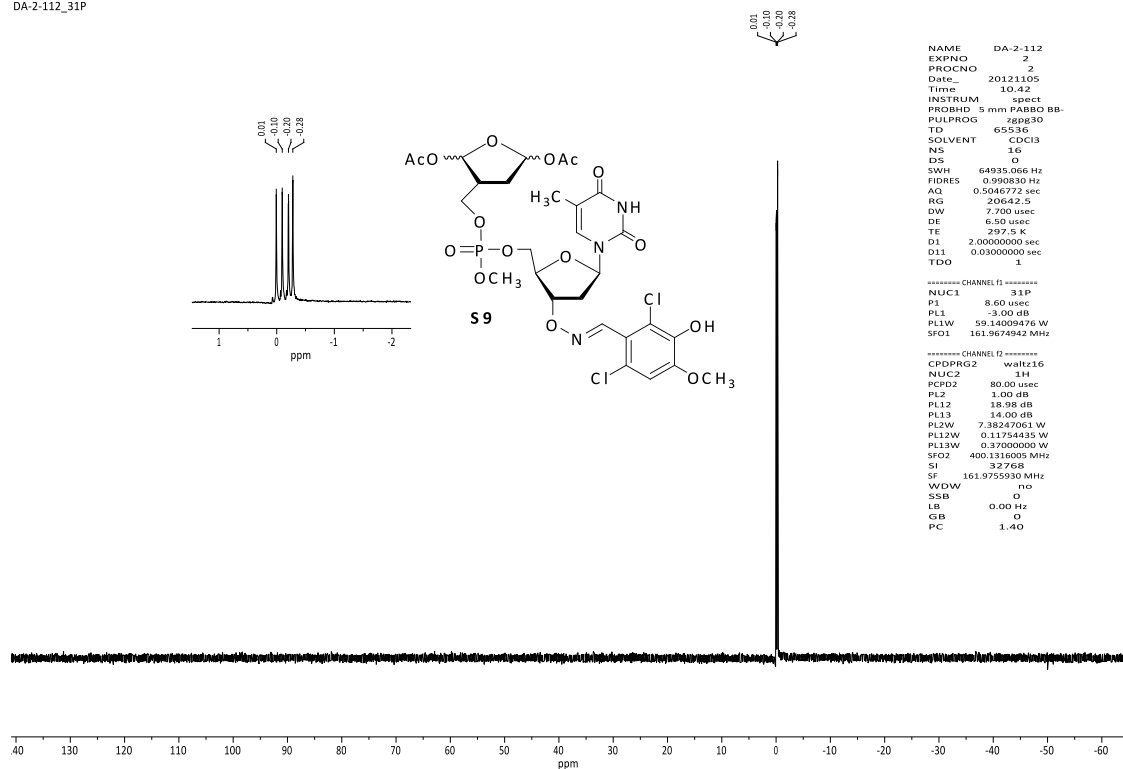

Supporting Information Figure 41.  $^{31}\text{P}$  NMR spectrum of S9 in  $\text{CDCl}_3$ .



DA-2-114\_1H

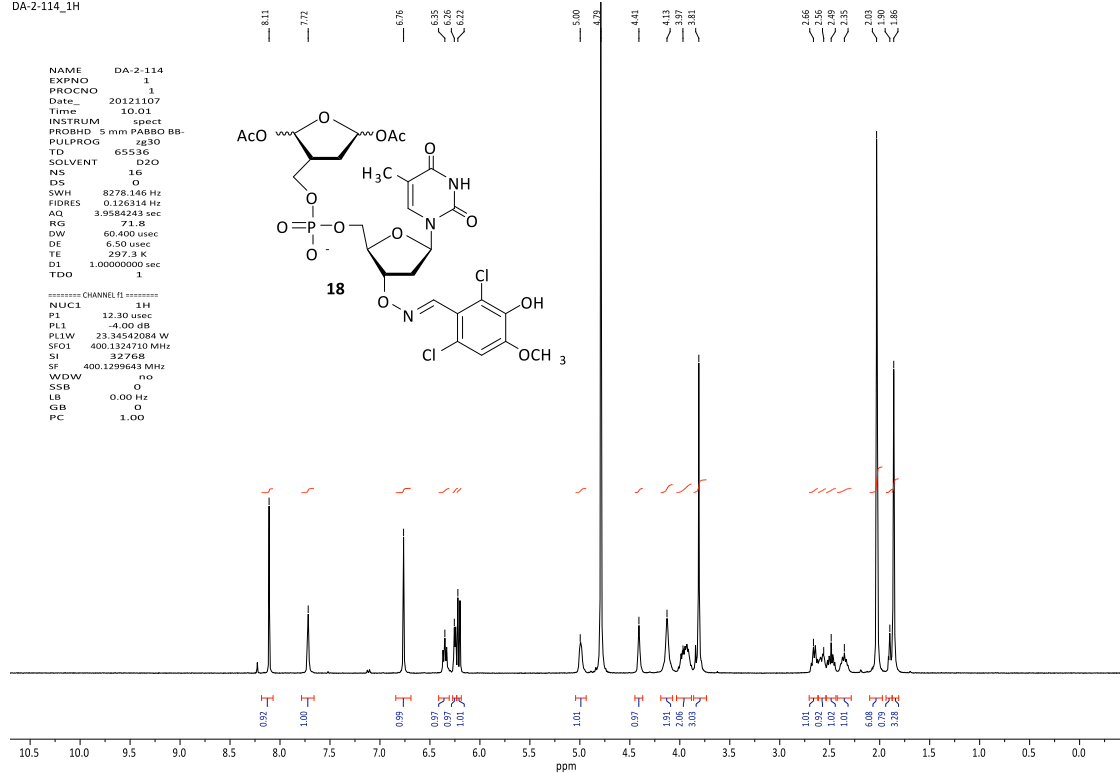

DA-2-114\_13C

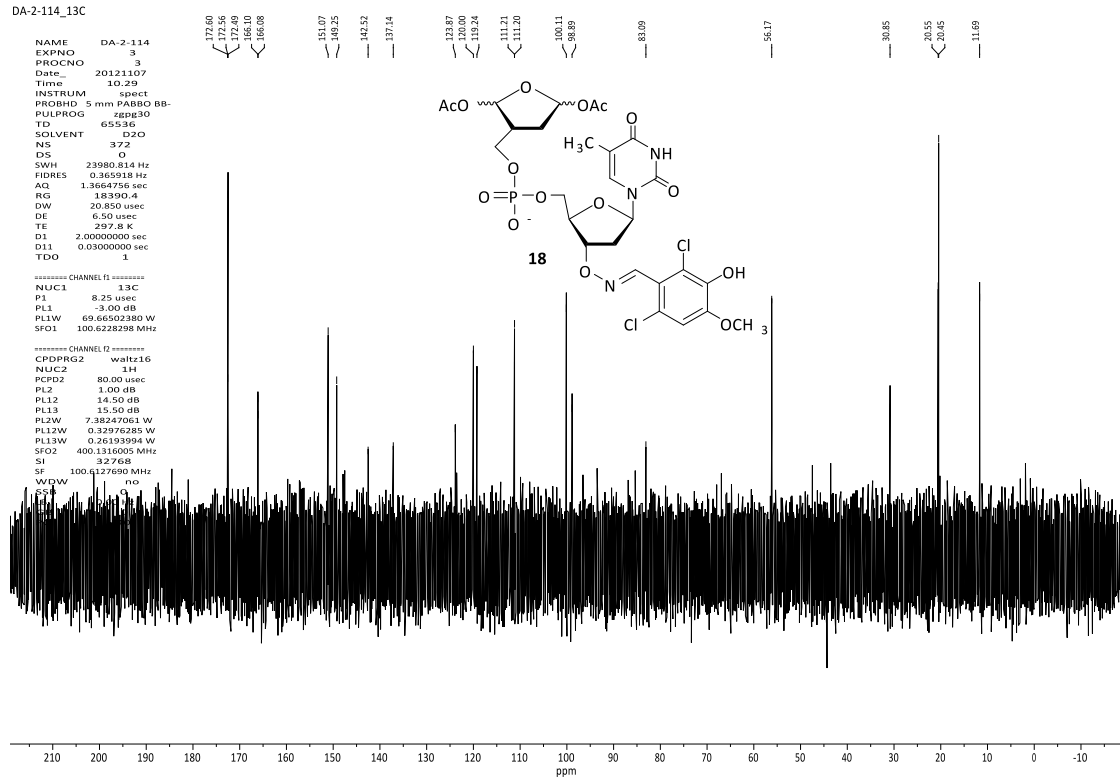

Supporting Information Figure 42. <sup>1</sup>H and <sup>13</sup>C NMR spectra of **18** in D<sub>2</sub>O.

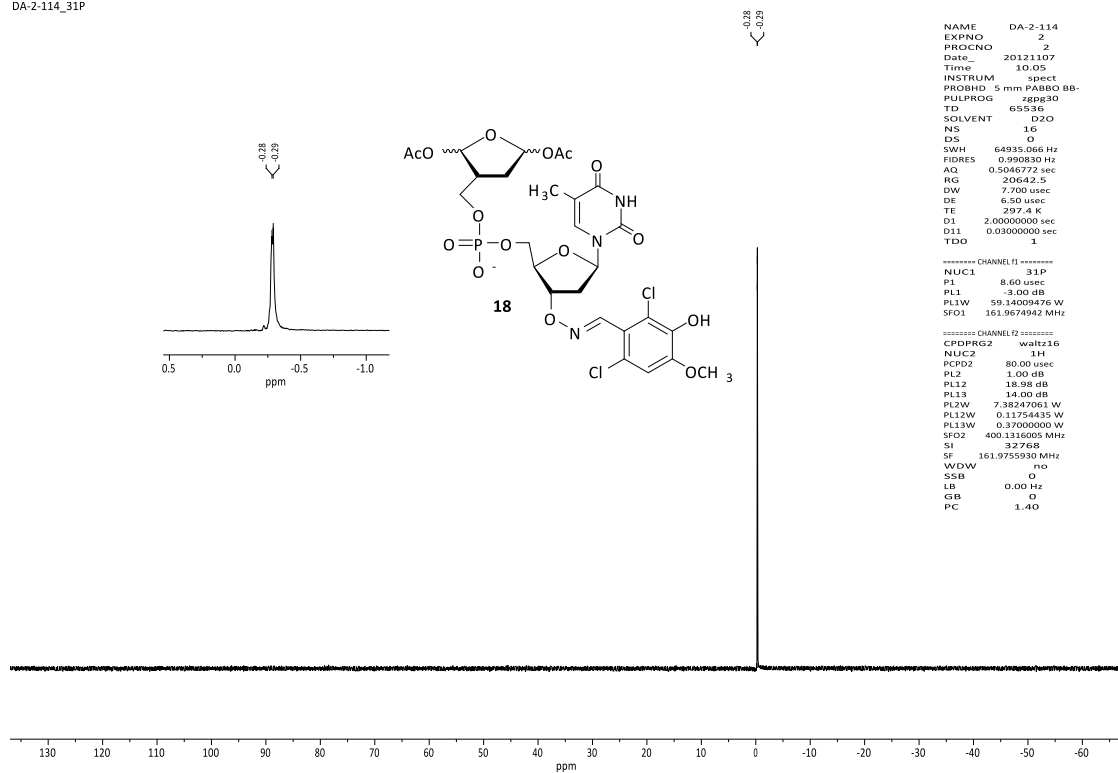

Supporting Information Figure 43.  $^{31}\text{P}$  NMR spectrum of **18** in  $\text{D}_2\text{O}$ .

DA-2-058\_1H

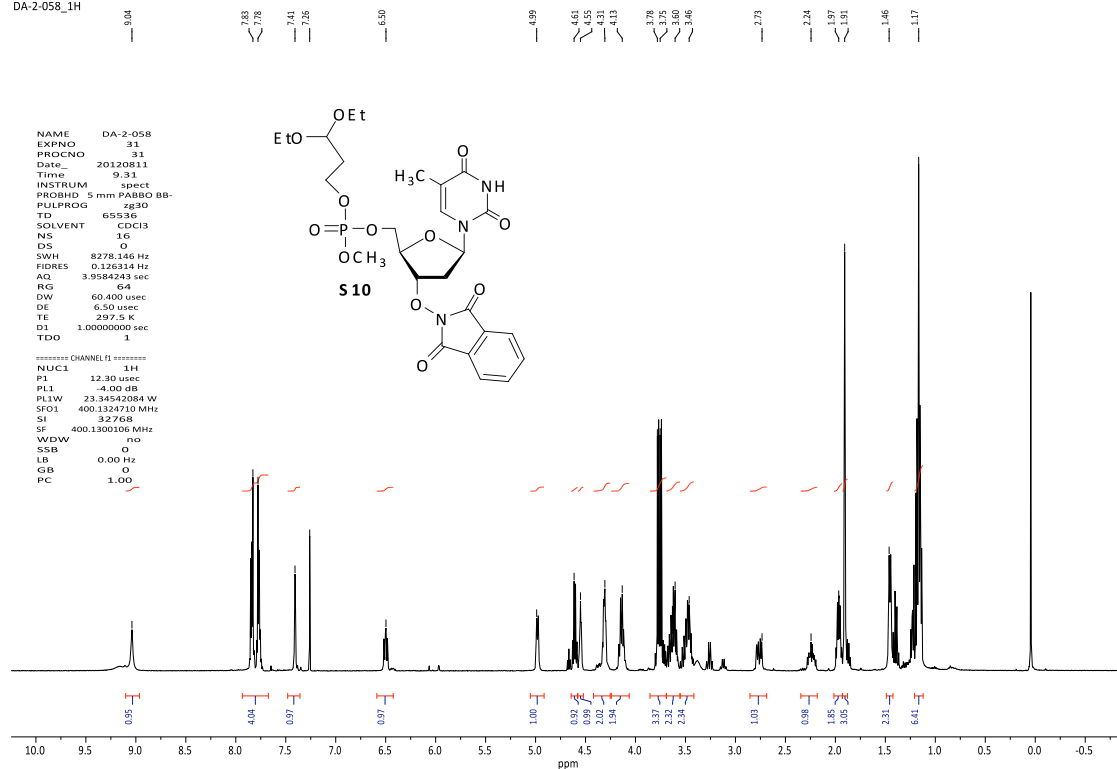

DA-2-058\_13C

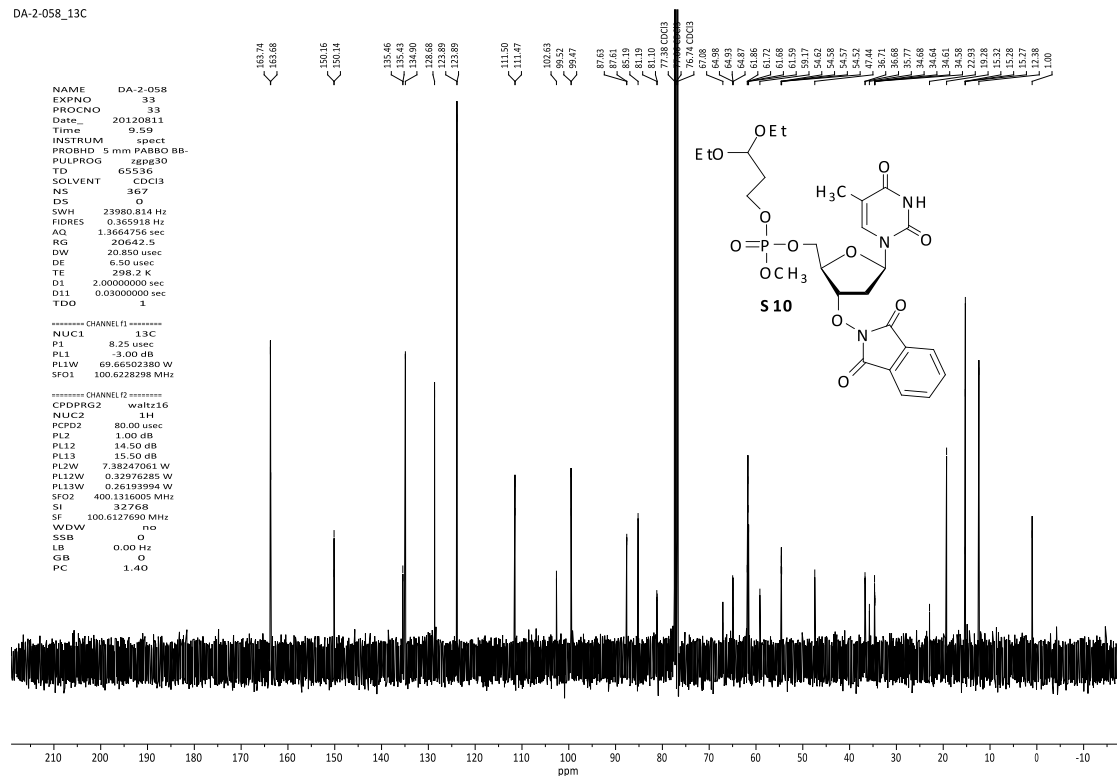

Supporting Information Figure 44. <sup>1</sup>H and <sup>13</sup>C NMR spectra of S10 in CDCl<sub>3</sub>.

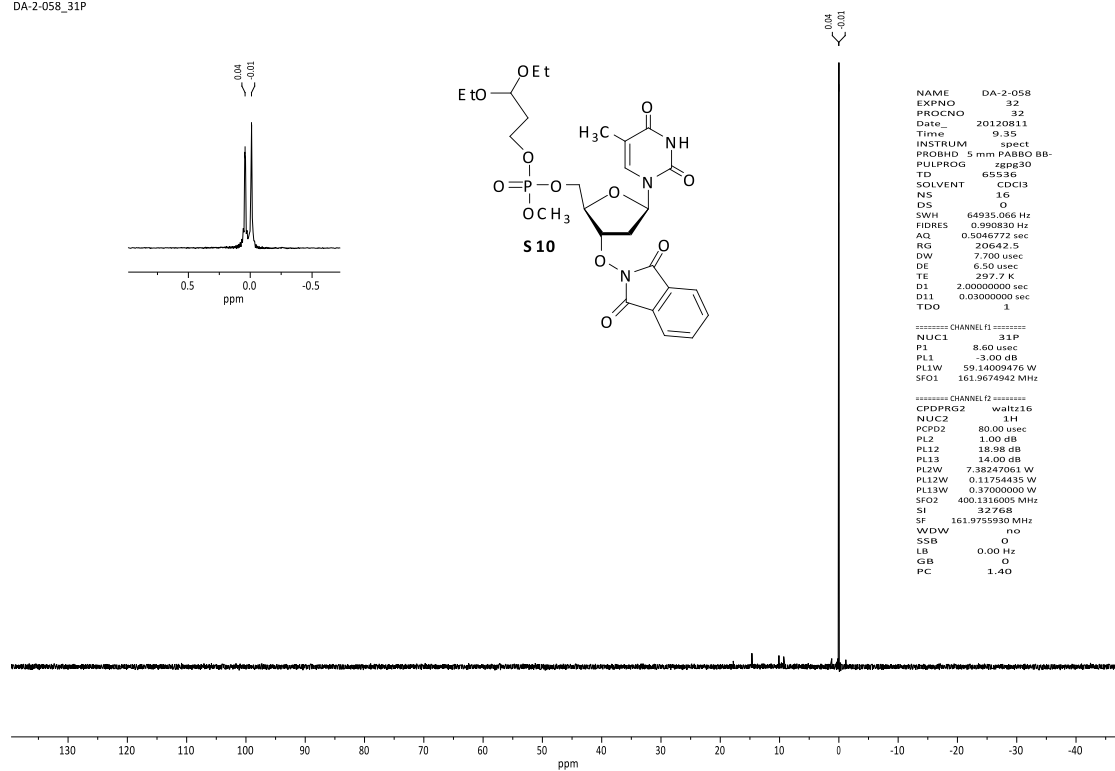

Supporting Information Figure 45.  $^{31}\text{P}$  NMR spectrum of **S10** in  $\text{CDCl}_3$ .

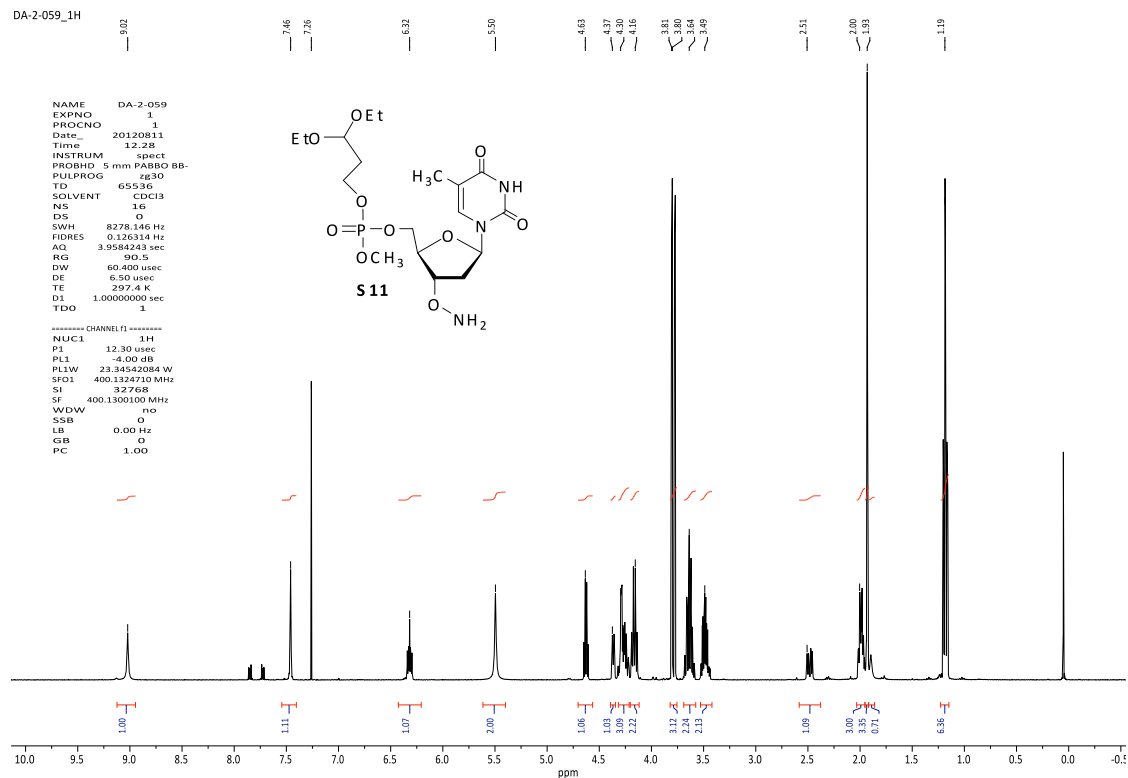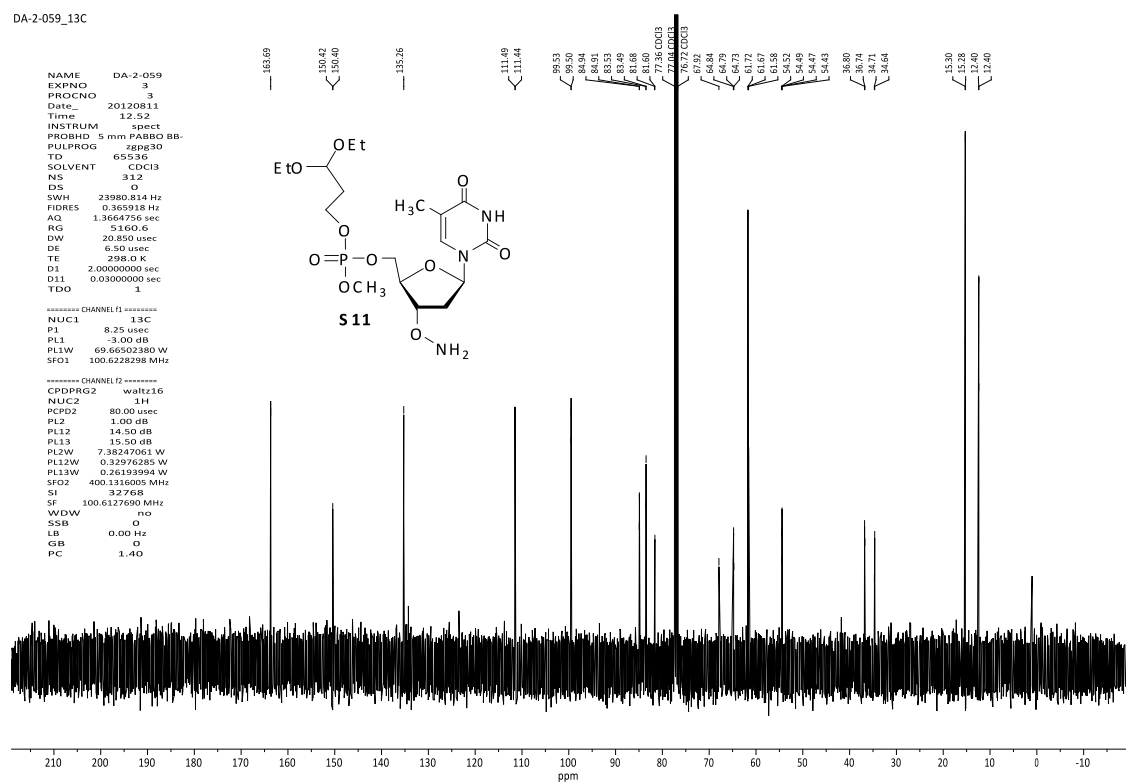

Supporting Information Figure 46. <sup>1</sup>H and <sup>13</sup>C NMR spectra of S11 in CDCl<sub>3</sub>.

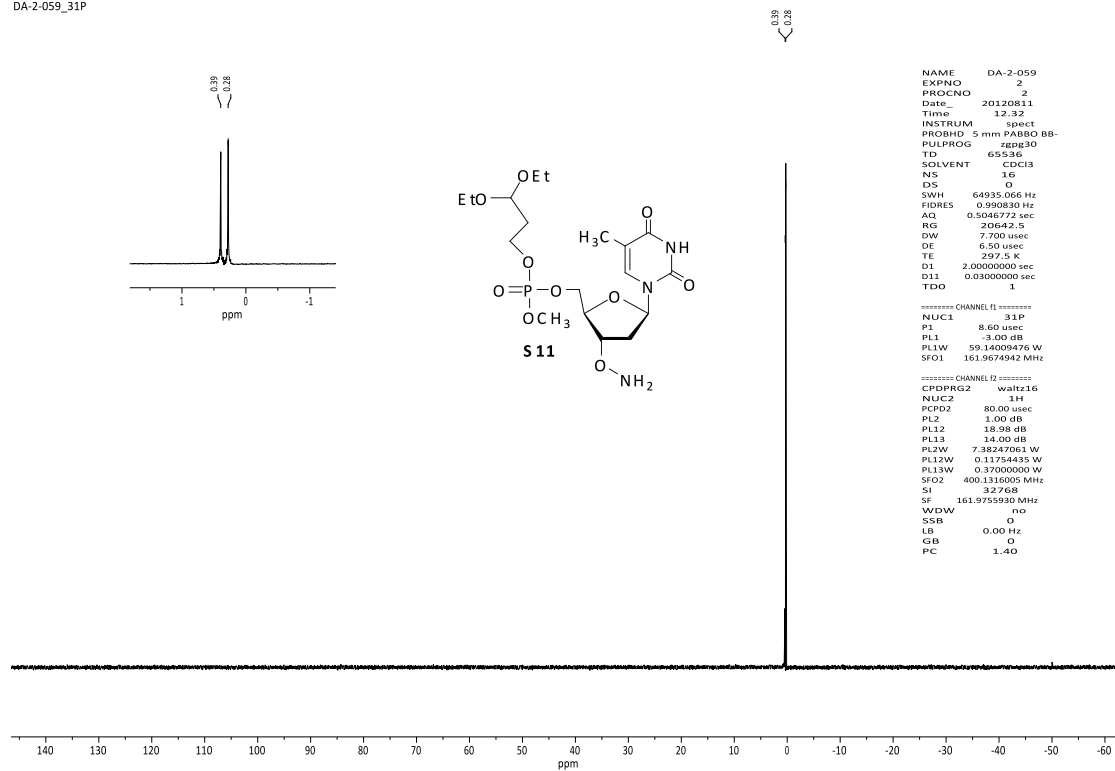

Supporting Information Figure 47. <sup>31</sup>P NMR spectrum of S11 in CDCl<sub>3</sub>.

DA-2-060\_1H

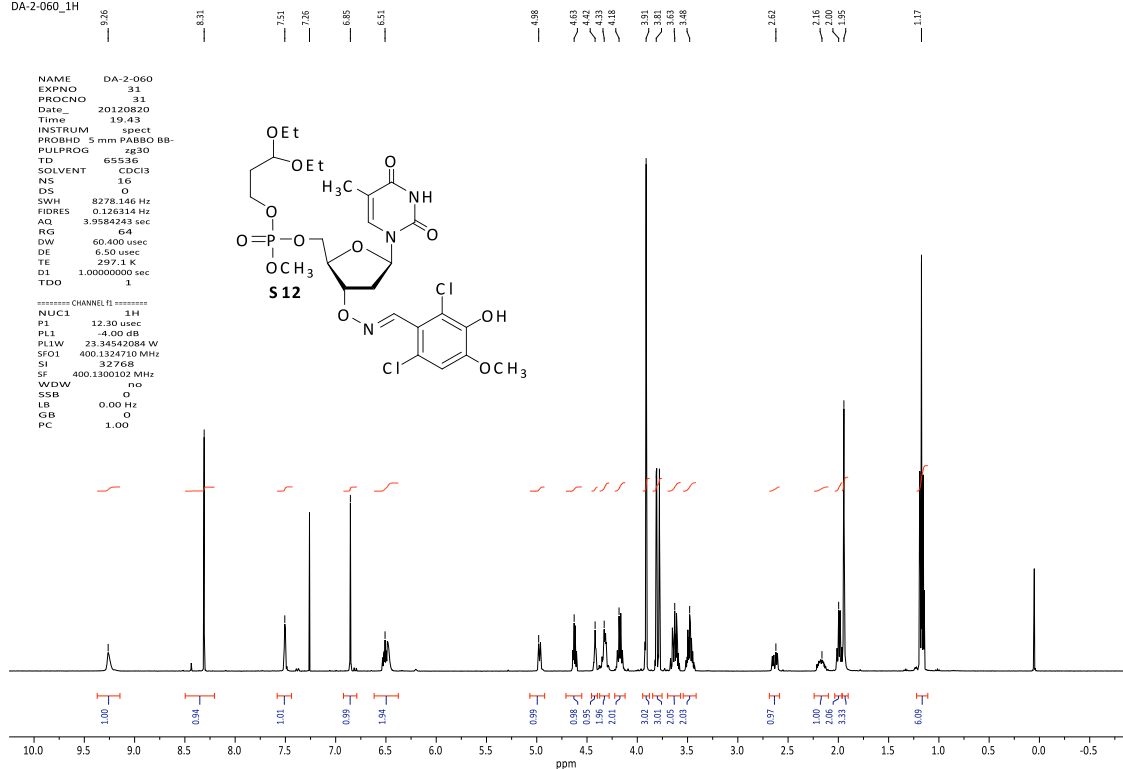

DA-2-060\_13C

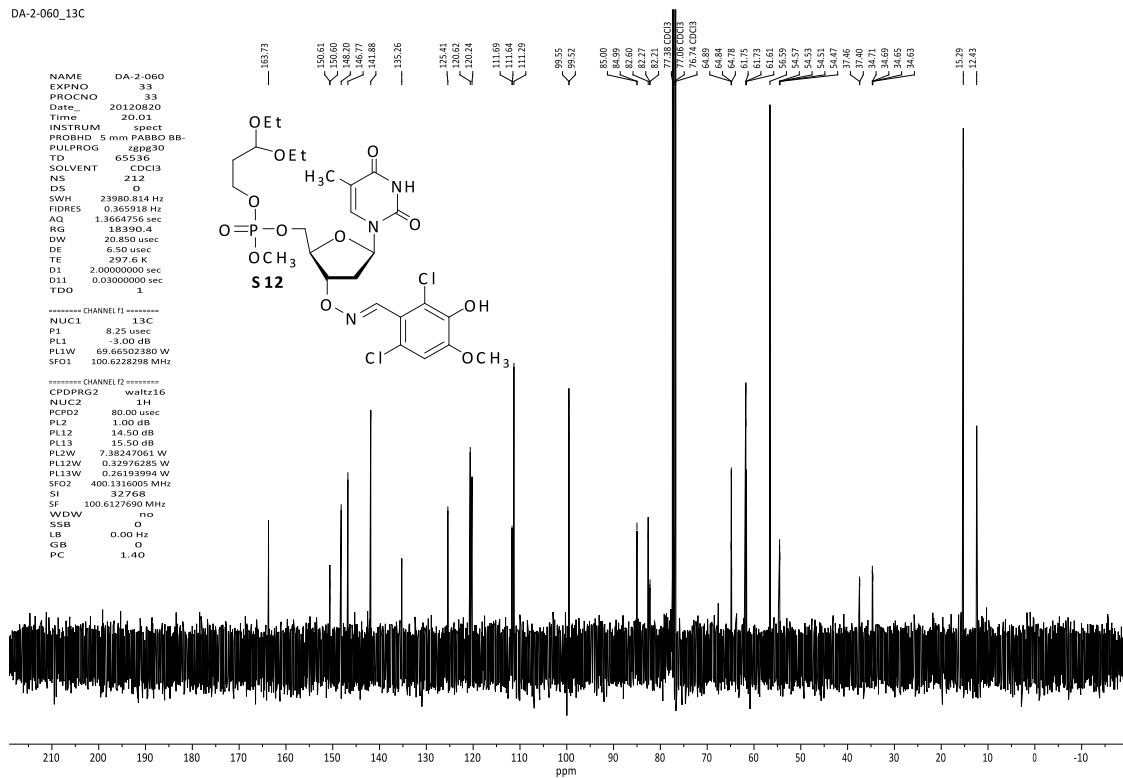

Supporting Information Figure 48. <sup>1</sup>H and <sup>13</sup>C NMR spectra of S12 in CDCl<sub>3</sub>.

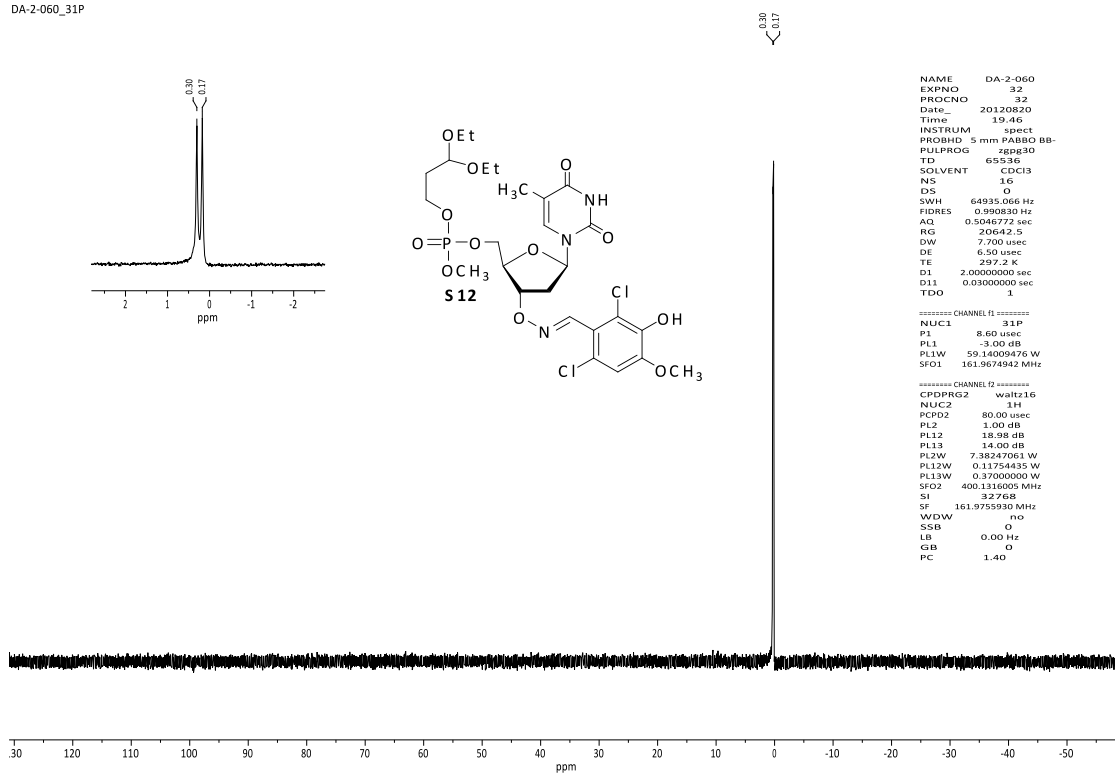

Supporting Information Figure 49.  $^{31}\text{P}$  NMR spectrum of S12 in  $\text{CDCl}_3$ .



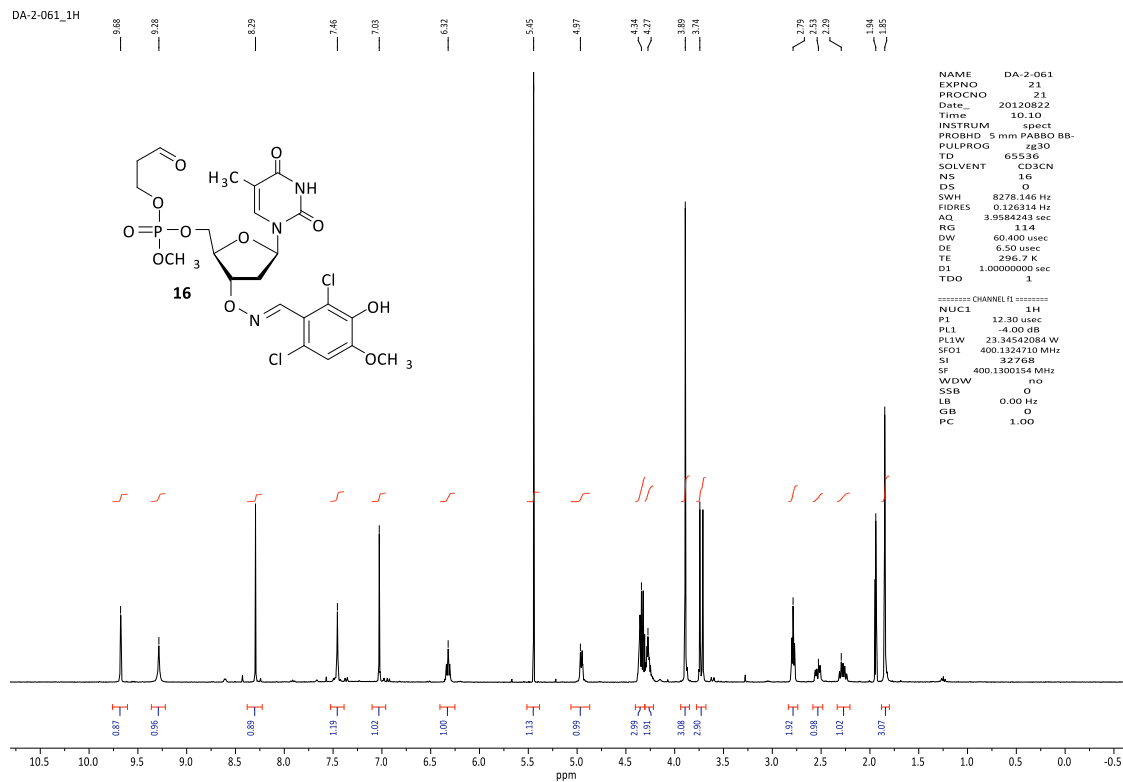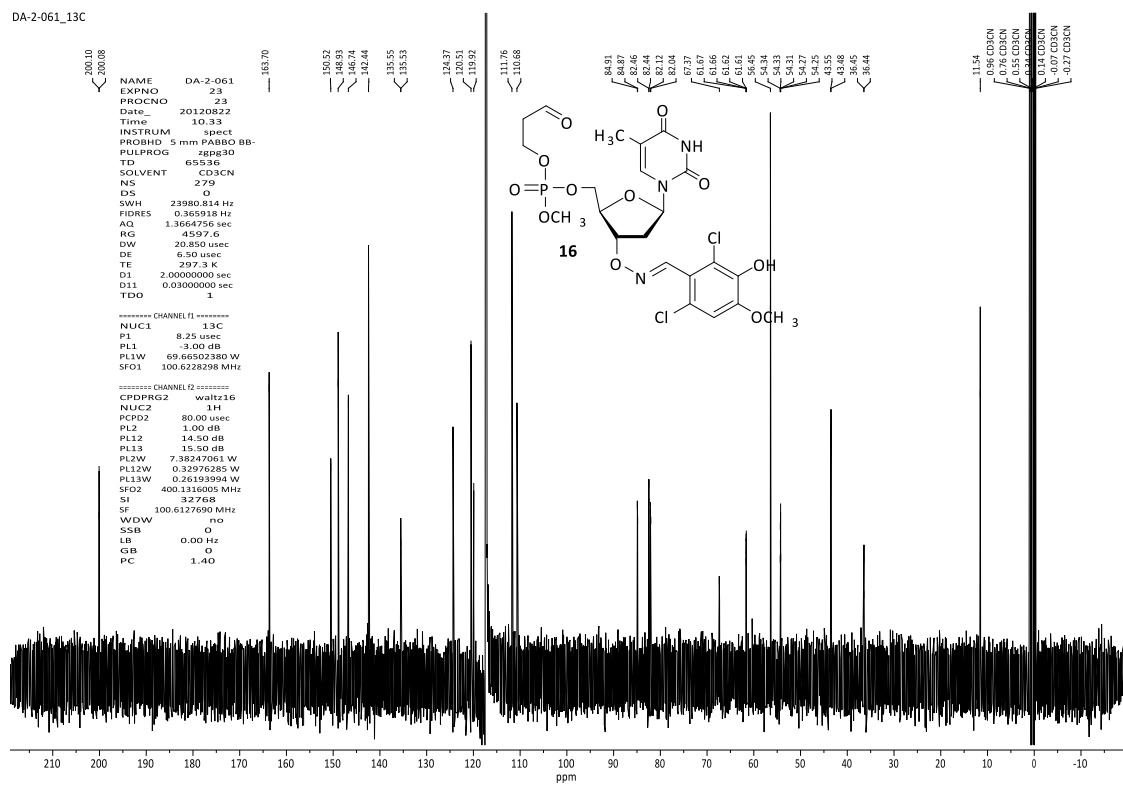

Supporting Information Figure 50.  $^1\text{H}$  and  $^{13}\text{C}$  NMR spectra of **16** in acetonitrile- $d_3$ .

DA-2-061\_31P

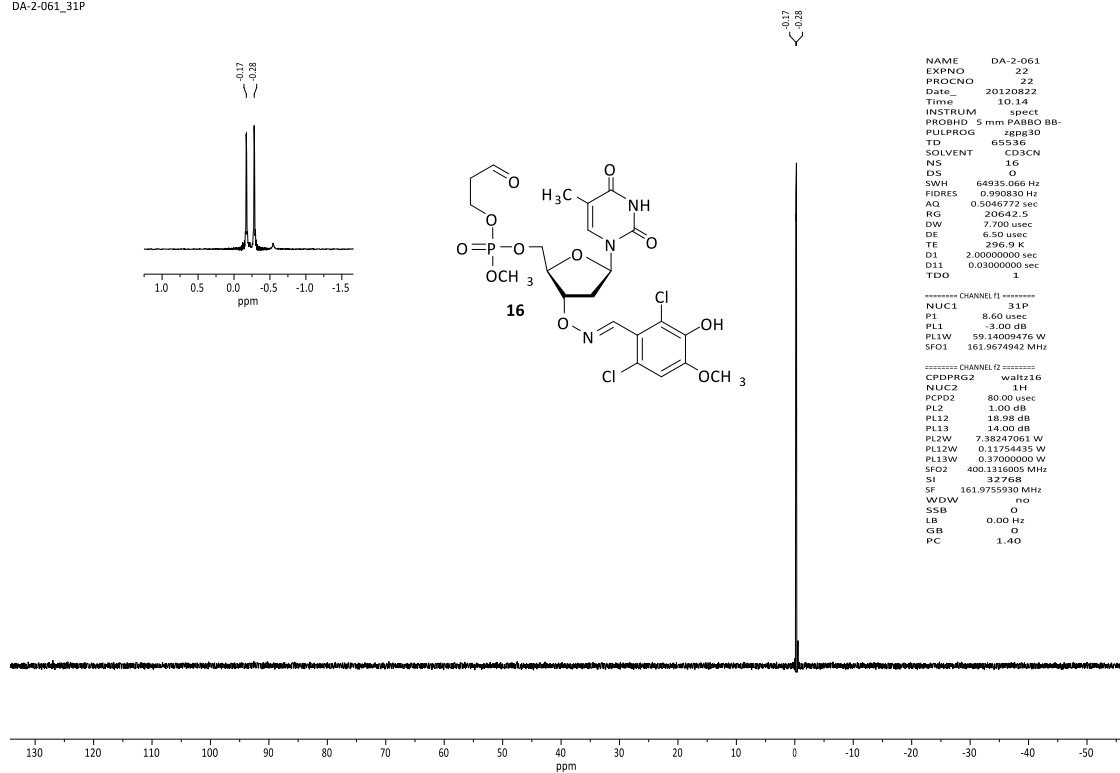

Supporting Information Figure 51. <sup>31</sup>P NMR spectrum of 16 in acetonitrile-d<sub>3</sub>.
